# Supplementary material for: Tandem catalytic allylic C–H amination and asymmetric [2,3]-rearrangement via bimetallic relay catalysis
Source: Royal Society of Chemistry journal article supplement (doi:10.1039/d4sc03315a), 2024-01-01
Supplement: d4sc03315a1.pdf [file d4sc03315a1.pdf]

*Supporting Information*

**Tandem Catalytic Allylic C–H Amination and Asymmetric  
[2,3]-Rearrangement via Bimetallic Relay Catalysis**

*Table of Contents*

|                                                                          |    |
|--------------------------------------------------------------------------|----|
| 1. General information .....                                             | 2  |
| 2. General procedure for the synthesis of amino amide.....               | 2  |
| 3. Preparation of allylbenzene derivatives .....                         | 2  |
| 4. Reaction optimization for [2,3]-rearrangement .....                   | 6  |
| 5. Scope Limitation.....                                                 | 15 |
| 6. General procedure for synthesis of [2,3]-rearrangement products ..... | 16 |
| 7. Synthetic applications .....                                          | 72 |
| 8. Determination of the absolute configuration .....                     | 82 |
| 9. Control experiment .....                                              | 83 |
| 10. Initial Rate Kinetic Isotope Effects (KIE) study .....               | 84 |
| 11. NMR spectrum.....                                                    | 85 |

## 1. General information

All solvents were dried and distilled according to general practice prior to use. All reagents were purchased from commercial sources and used without further purification unless specified otherwise. Solvents for flash column chromatography were technical grade and distilled prior to use. Analytical thin-layer chromatography (TLC) was performed using Huanghai silica gel plates with HSGF 254. Visualization of the developed chromatogram was performed by UV absorbance (254 nm) and appropriate stains. Flash column chromatography was performed using silica gel (200-300 mesh, from Leyan.com) with the indicated solvent system according to standard techniques. CDCl<sub>3</sub> was also bought from Leyan.com. <sup>1</sup>H NMR and <sup>13</sup>C NMR were recorded on a Bruker NMR 400 (400MHz, 101MHz). Multiplicities are described as: s (singlet), d (doublet), t (triplet), q (quartet), m (multiplet); and coupling constants (*J*) are reported in Hertz (Hz). <sup>13</sup>C NMR spectra were recorded with total proton decoupling. Melting points were recorded on a Shanghai Jingke SGWX-4B melting-point Meter and are uncorrected. Chiral HPLC was recorded on a Shimadzu LC-20AD spectrometer using Daicel Chiralcel columns. HRMS (ESI) analysis was performed by the Analytical Instrumentation Center at Peking University Shenzhen Graduate School and (HRMS) data were reported with ion mass/charge (*m/z*) ratios as values in atomic mass units.

## 2. General procedure for the synthesis of amino amide

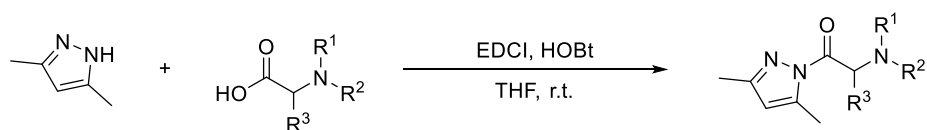

A solution of amino acid (1.1 equiv.) in anhydrous THF was cooled to 0 °C. The 3,5-dimethyl-1H-pyrazole (1.0 equiv.), EDCI (1.2 equiv.), HOBT (1.2 equiv.) and DMAP (0.1 equiv.) were successively added, the reaction mixture was stirred for 24 h at room temperature. To the mixture was added brine and the aqueous layer was separated and extracted with dichloromethane. The combined organic extracts were dried over anhydrous sodium sulfate, filtered and concentrated. The residue was subjected to column chromatography to give the product.

## 3. Preparation of allylbenzene derivatives

### 3.1 Method A

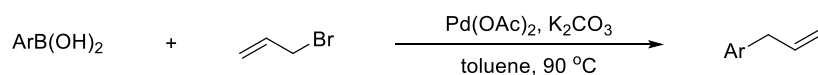

Under N<sub>2</sub> atmosphere, to a solution of arylboronic acid (1.0 equiv.), Pd(OAc)<sub>2</sub> (2.5 mol%) and K<sub>2</sub>CO<sub>3</sub> (2.0 equiv.) in toluene, allyl bromide (2.0 equiv.) was added via syringe. After being heated at 90 °C overnight, the mixture was cooled to room temperature, filtered and concentrated in vacuo. The residue was purified by silica gel chromatography to afford the product.

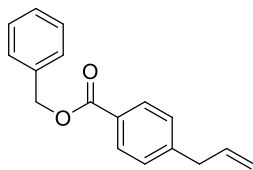

**benzyl 4-allylbenzoate (1p):** Following the general procedure, 4-((benzyloxy)carbonyl)phenylboronic acid (1.6 g, 6.25 mmol) to yield **1p** as a colorless oil (1.12 g, 71% yield).

**TLC:**  $R_f = 0.9$  (petroleum ether).

**$^1\text{H NMR}$**  (400 MHz,  $\text{CDCl}_3$ )  $\delta$  8.02 (d,  $J = 8.3$  Hz, 2H), 7.47 – 7.32 (m, 6H), 7.27 (s, 1H), 7.25 (s, 1H), 6.02 – 5.89 (m, 1H), 5.36 (s, 2H), 5.14 – 5.06 (m, 2H), 3.44 (d,  $J = 6.7$  Hz, 2H).

**$^{13}\text{C NMR}$**  (101 MHz,  $\text{CDCl}_3$ )  $\delta$  166.5, 145.7, 136.5, 136.2, 133.1, 130.0, 128.7, 128.7, 128.3, 128.2, 116.7, 66.6, 40.2.

**HRMS**  $m/z$   $[\text{M}+\text{H}]^+$  calcd for  $\text{C}_{17}\text{H}_{17}\text{O}_2^+$  = 253.1223, found 253.1225.

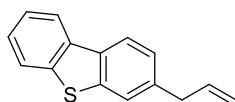

**3-allyldibenzo[*b,d*]thiophene (1t):** Following the general procedure, dibenzo[*b,d*]thiophen-3-ylboronic acid (1.5 g, 6.25 mmol) to yield **1t** as white solid (0.96 g, 65% yield), M.p. 50 – 51 °C.

**TLC:**  $R_f = 0.9$  (petroleum ether).

**$^1\text{H NMR}$**  (400 MHz,  $\text{CDCl}_3$ )  $\delta$  8.16 – 8.10 (m, 1H), 8.08 (d,  $J = 8.1$  Hz, 1H), 7.87 – 7.82 (m, 1H), 7.68 (s, 1H), 7.46 – 7.41 (m, 2H), 7.30 (dd,  $J = 8.1, 1.5$  Hz, 1H), 6.14 – 5.96 (m, 1H), 5.20 – 5.09 (m, 2H), 3.55 (d,  $J = 6.7$  Hz, 2H).

**$^{13}\text{C NMR}$**  (101 MHz,  $\text{CDCl}_3$ )  $\delta$  139.8, 139.4, 139.1, 137.3, 135.5, 133.9, 126.4, 125.5, 124.4, 122.9, 122.5, 121.5, 121.4, 116.3, 40.4.

**HRMS**  $m/z$   $[\text{M}+\text{H}]^+$  calcd for  $\text{C}_{15}\text{H}_{13}\text{S}^+$  = 225.0732, found 225.0736.

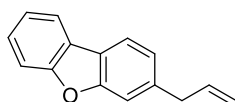

**3-allyldibenzo[*b,d*]furan (1u):** Following the general procedure, dibenzo[*b,d*]furan-3-ylboronic acid (1.5 g, 7.08 mmol) to yield **1u** as a colorless oil (1.02 g, 69% yield).

**TLC:**  $R_f = 0.9$  (petroleum ether).

**$^1\text{H NMR}$**  (400 MHz,  $\text{CDCl}_3$ )  $\delta$  7.94 (d,  $J = 7.7$  Hz, 1H), 7.78 (s, 1H), 7.57 (d,  $J = 8.3$  Hz, 1H), 7.53 – 7.42 (m, 2H), 7.39 – 7.27 (m, 2H), 6.18 – 6.01 (m, 1H), 5.21 – 5.07 (m, 2H), 3.57 (d,  $J = 6.6$  Hz, 2H).

**$^{13}\text{C NMR}$**  (101 MHz,  $\text{CDCl}_3$ )  $\delta$  156.6, 155.0, 137.9, 134.6, 127.9, 127.1, 124.4, 124.3, 122.7, 120.7, 120.4, 115.9, 111.7, 111.5, 40.2.

**HRMS**  $m/z$   $[\text{M}+\text{H}]^+$  calcd for  $\text{C}_{15}\text{H}_{13}\text{O}^+$  = 209.0961, found 209.0964.

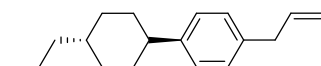

**1-allyl-4-((1*r*,4*s*)-4-propylcyclohexyl)benzene (1x):** Following the general procedure, (4-((1*r*,4*s*)-4-propylcyclohexyl)phenyl)boronic acid (1.8 g, 7.31 mmol) to yield **1x** as a colorless oil (1.23 g, 69% yield).

**TLC:**  $R_f = 0.9$  (petroleum ether).

**<sup>1</sup>H NMR** (400 MHz, CDCl<sub>3</sub>)  $\delta$  7.20 – 7.09 (m, 4H), 6.05 – 5.87 (m, 1H), 5.16 – 5.01 (m, 2H), 3.37 (d,  $J = 6.8$  Hz, 2H), 2.54 – 2.35 (m, 1H), 1.98 – 1.78 (m, 4H), 1.52 – 1.40 (m, 2H), 1.40 – 1.26 (m, 3H), 1.26 – 1.19 (m, 2H), 1.12 – 0.97 (m, 2H), 0.92 (t,  $J = 7.3$  Hz, 3H).

**<sup>13</sup>C NMR** (101 MHz, CDCl<sub>3</sub>)  $\delta$  145.8, 137.7, 137.5, 128.5, 126.9, 115.7, 44.3, 39.9, 39.8, 37.1, 34.5, 33.7, 20.1, 14.5.

**HRMS**  $m/z$  [M+H]<sup>+</sup> calcd for C<sub>18</sub>H<sub>27</sub><sup>+</sup> = 243.2107, found 243.2110.

### 3.2 Method B

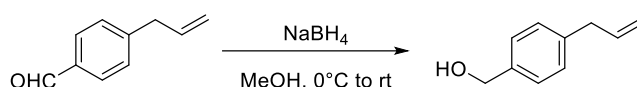

To a solution of 4-allylbenzaldehyde (5.0 mmol) in MeOH (20 mL) at 0 °C, NaBH<sub>4</sub> (0.38 g, 10 mmol) was slowly added. The reaction mixture was slowly warmed to room temperature and stirred overnight. After washed with 5% HCl (aq.), brine, and H<sub>2</sub>O, the combined organic layers were dried over Na<sub>2</sub>SO<sub>4</sub>, filtrated, and then concentrated under vacuum. The crude product was purified by flash column chromatography (petroleum ether/ethyl acetate = 10/1) to afford the desired product.

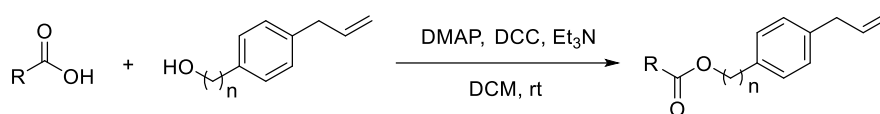

Under nitrogen atmosphere, to a solution of carboxylic acid compound (1.0 equiv.), DMAP (0.2 equiv.), DCC (1.1 equiv.), Et<sub>3</sub>N (2.0 equiv.) and alcohol in dichloromethane was added at rt. The mixture was stirred at room temperature overnight. After the reaction was completed, the suspension was filtered through a celite pad. The filtrate was concentrated under reduced pressure. The resulting crude product was purified by flash column chromatography (petroleum ether/ethyl acetate) to afford the desired product.

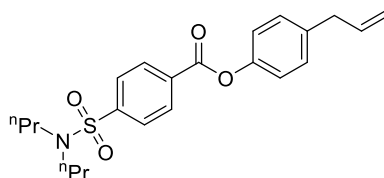

**4-Allylphenyl 4-(*N,N*-dipropylsulfamoyl)benzoate (1ca):** Following the general procedure, dibenzo[*b,d*]furan-3-ylboronic acid (1.0 g, 3.5 mmol) to yield **1ca** as a white solid (0.87 g, 62% yield), M.p. 66 – 68 °C.

**TLC:**  $R_f = 0.7$  (petroleum ether/ethyl acetate 10/1).

**<sup>1</sup>H NMR** (400 MHz, CDCl<sub>3</sub>)  $\delta$  = 8.32 – 8.30 (m, 2H), 7.95 – 7.93 (m, 2H), 7.31 – 7.22 (m, 2H), 7.15 – 7.13 (m, 2H), 6.04 – 5.90 (m, 1H), 5.15 – 5.07 (m, 2H), 3.42 (d,  $J = 6.6$  Hz, 2H), 3.18 – 3.09 (m, 4H), 1.61 – 1.52 (m, 4H), 0.88 (t,  $J = 7.4$  Hz, 6H).

$^{13}\text{C}$  NMR (101 MHz,  $\text{CDCl}_3$ )  $\delta$  = 164.1, 149.0, 144.9, 138.2, 137.1, 133.0, 130.9, 129.8, 127.2, 121.4, 116.3, 50.0, 39.7, 22.0, 11.2.

HRMS  $m/z$   $[\text{M}+\text{H}]^+$  calcd for  $\text{C}_{22}\text{H}_{28}\text{NO}_4\text{S}^+$  = 402.1734, found 402.1733.

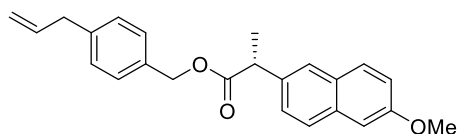

**4-allylbenzyl (*R*)-2-(6-methoxynaphthalen-2-yl)propanoate (1cb):** Following the general procedure, Naproxen (1.0 g, 4.3 mmol) to yield **1cb** as a white solid (1.14 g, 73% yield), M.p. 61 – 63 °C.

TLC:  $R_f$  = 0.8 (petroleum ether/ethyl acetate 10/1).

$^1\text{H}$  NMR (400 MHz,  $\text{CDCl}_3$ )  $\delta$  7.81 – 7.67 (m, 3H), 7.51 – 7.44 (m, 1H), 7.34 – 7.15 (m, 6H), 6.07 – 5.93 (m, 1H), 5.23 – 5.07 (m, 4H), 3.97 (s, 4H), 3.42 (d,  $J$  = 6.7 Hz, 2H), 1.65 (d,  $J$  = 7.2 Hz, 3H).

$^{13}\text{C}$  NMR (101 MHz,  $\text{CDCl}_3$ )  $\delta$  174.6, 157.7, 140.1, 137.3, 135.7, 133.82, 133.77, 129.4, 129.0, 128.8, 128.3, 127.2, 126.4, 126.1, 119.0, 116.1, 105.6, 66.5, 55.4, 45.5, 40.0, 18.7.

HRMS  $m/z$   $[\text{M}+\text{H}]^+$  calcd for  $\text{C}_{24}\text{H}_{25}\text{O}_3^+$  = 361.1798, found 361.1800.

## 4. Reaction optimization for [2,3]-rearrangement

**Table S1: Screening of Lewis acids**

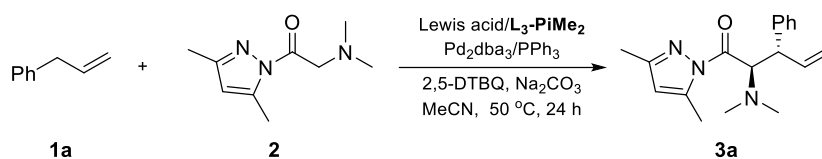

| Entry <sup>a</sup> | Lewis Acid                                           | Yield      | <i>dr</i> ( <i>anti:syn</i> ) | <i>er</i> |
|--------------------|------------------------------------------------------|------------|-------------------------------|-----------|
| 1                  | Sc(OTf) <sub>3</sub>                                 | No product | N.D. <sup>e</sup>             | N.D.      |
| 2                  | Ni(OTf) <sub>2</sub>                                 | No product | N.D.                          | N.D.      |
| 3                  | Zn(OTf) <sub>2</sub>                                 | No product | N.D.                          | N.D.      |
| 4                  | Fe(OTf) <sub>2</sub>                                 | No product | N.D.                          | N.D.      |
| 5                  | Yb(OTf) <sub>3</sub>                                 | No product | N.D.                          | N.D.      |
| 6                  | Mg(OTf) <sub>2</sub>                                 | trace      | N.D.                          | N.D.      |
| 7                  | Co(BF <sub>4</sub> ) <sub>2</sub> ·6H <sub>2</sub> O | No product | N.D.                          | N.D.      |

Reaction conditions: **1a** (0.2 mmol, 2.0 equiv.), **2** (0.1 mmol, 1.0 equiv.), Pd<sub>2</sub>(dba)<sub>3</sub> (4 mol%), PPh<sub>3</sub> (8 mol%), 2,5-DTBQ (0.11 mmol, 1.1 equiv.), Lewis acid (10 mol%), **L<sub>3</sub>-PiMe<sub>2</sub>** (10 mol%), and Na<sub>2</sub>CO<sub>3</sub> (0.12 mmol, 1.2 equiv.) in MeCN (2.0 mL) at 50 °C for 24 h. The yield and diastereomeric ratio (*dr*) were determined via <sup>1</sup>H NMR analysis of the crude reaction mixtures using 4-methylanisole as the internal standard. The enantiomeric ratio (*er*) was determined by chiral HPLC analysis. Compound **3a** was converted into its methyl ester derivative quantitatively with MeOH at 60 °C to determine its *er* value. [b] N.D. = no detection. 2,5-DTBQ = 2,5-ditertbutylquinone.

**Table S2: Screening of chiral *N,N'*-dioxide ligands**

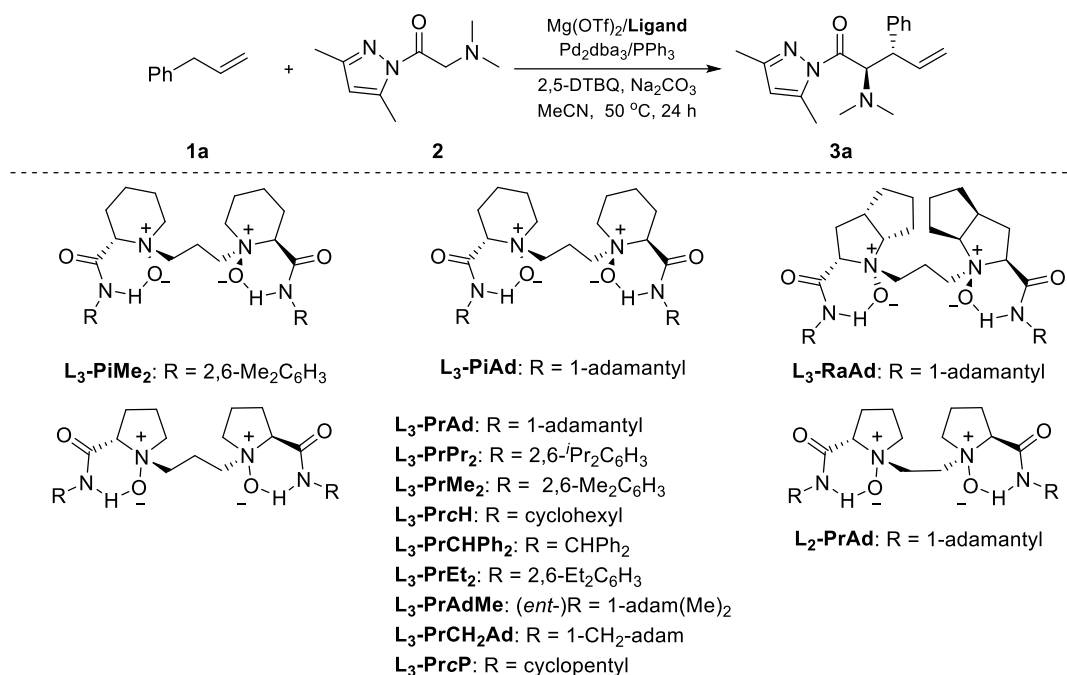

| Entry | Ligand                                            | Yield | <i>dr</i> ( <i>anti</i> : <i>syn</i> ) | <i>er</i>   |
|-------|---------------------------------------------------|-------|----------------------------------------|-------------|
| 1     | <b>L<sub>3</sub>-PiMe<sub>2</sub></b>             | trace | N.D.                                   | N.D.        |
| 2     | <b>L<sub>3</sub>-PiAd</b>                         | 44    | 2:1                                    | 54:46/51:49 |
| 3     | <b>L<sub>3</sub>-RaAd</b>                         | 47    | 3:1                                    | 82:18/62:38 |
| 4     | <b>L<sub>3</sub>-PrAd</b>                         | 55    | 5:1                                    | 78:22/62:38 |
| 5     | <b>L<sub>3</sub>-Pr<sup>i</sup>Pr<sub>2</sub></b> | 38    | 3:1                                    | 57:43/60:40 |
| 6     | <b>L<sub>3</sub>-PrMe<sub>2</sub></b>             | 35    | 2:1                                    | 56:44/53:47 |
| 7     | <b>L<sub>3</sub>-Pr<sub>c</sub>H</b>              | 48    | 3:1                                    | 60:40/57:43 |
| 8     | <b>L<sub>3</sub>-PrCHPh<sub>2</sub></b>           | 30    | 3:1                                    | 56:44/57:43 |
| 9     | <b>L<sub>3</sub>-PrEt<sub>2</sub></b>             | 35    | 2:1                                    | 56:44/57:43 |
| 10    | <b>L<sub>3</sub>-PrAdMe<sub>2</sub></b>           | 36    | 3:1                                    | 62:38/55:45 |
| 11    | <b>L<sub>3</sub>-PrCH<sub>2</sub>Ad</b>           | 35    | 2:1                                    | 60:40/56:44 |
| 12    | <b>L<sub>3</sub>-Pr<sub>c</sub>P</b>              | 35    | 2.5:1                                  | 66:34/76:24 |
| 13    | <b>L<sub>2</sub>-PrAd</b>                         | 30    | 1.5:1                                  | 57:43/59:41 |

Reaction conditions: **1a** (0.2 mmol, 2.0 equiv.), **2** (0.1 mmol, 1.0 equiv.),  $\text{Pd}_2(\text{dba})_3$  (4 mol%),  $\text{PPh}_3$  (8 mol%), 2,5-DTBQ (0.11 mmol, 1.1 equiv.),  $\text{Mg}(\text{OTf})_2$  (10 mol%), **Ligand** (10 mol%), and  $\text{Na}_2\text{CO}_3$  (0.12 mmol, 1.2 equiv.) in MeCN (2.0 mL) at 50 °C for 24 h. The yield and diastereomeric ratio (*dr*) were determined via <sup>1</sup>H NMR analysis of the crude reaction mixtures using 4-methylanisole as the internal standard. The enantiomeric ratio (*er*) was determined by chiral HPLC analysis. Compound **3a** was converted into its methyl ester derivative quantitatively with MeOH at 60 °C to determine its *er* value.

**Table S3: Screening of Lewis acids again with the use of L<sub>3</sub>-PrAd**

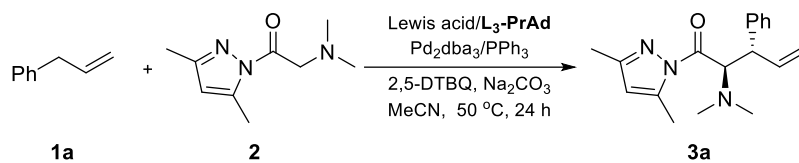

| Entry | Lewis Acid           | Yield | <i>dr</i> ( <i>anti:syn</i> ) | <i>er</i> |
|-------|----------------------|-------|-------------------------------|-----------|
| 1     | Sc(OTf) <sub>3</sub> | trace | N.D.                          | N.D.      |
| 2     | Ni(OTf) <sub>2</sub> | trace | N.D.                          | N.D.      |

Reaction conditions: **1a** (0.2 mmol, 2.0 equiv.), **2** (0.1 mmol, 1.0 equiv.), Pd<sub>2</sub>(dba)<sub>3</sub> (4 mol%), PPh<sub>3</sub> (8 mol%), 2,5-DTBQ (0.11 mmol, 1.1 equiv.), lewis acid (10 mol%), **L<sub>3</sub>-PrAd** (10 mol%), Na<sub>2</sub>CO<sub>3</sub> (1.2 equiv.) in MeCN (2.0 mL) at 50 °C for 24 h. The yield and diastereomeric ratio (*dr*) were determined via <sup>1</sup>H NMR analysis of the crude reaction mixtures using 4-methylanisole as the internal standard. The enantiomeric ratio (*er*) was determined by chiral HPLC analysis. Compound **3a** was converted into its methyl ester derivative quantitatively with MeOH at 60 °C to determine its *er* value.



**Table S4: Screening of solvent**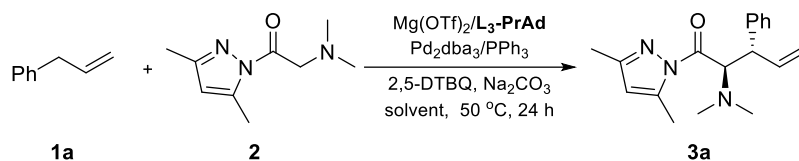

| Entry | Solvent                 | Yield      | <i>dr</i> ( <i>anti:syn</i> ) | <i>er</i>   |
|-------|-------------------------|------------|-------------------------------|-------------|
| 1     | Dichloromethane         | trace      | N.D.                          | N.D.        |
| 2     | Toluene                 | No product | N.D.                          | N.D.        |
| 3     | Tetrahydrofuran         | No product | N.D.                          | N.D.        |
| 4     | 2-Methyltetrahydrofuran | 15         | 2.5:1                         | N.D.        |
| 5     | 1,4-Dioxane             | 61         | 1:1                           | 54:46/50:50 |
| 6     | Ethyl acetate           | 67         | 1.5:1                         | 53:47/52:48 |
| 7     | Acetonitrile            | 55         | 5:1                           | 78:22/62:38 |
| 8     | Isobutyronitrile        | No product | N.D.                          | N.D.        |
| 9     | Benzonitrile            | No product | N.D.                          | N.D.        |

Reaction conditions: **1a** (0.2 mmol, 2.0 equiv.), **2** (0.1 mmol, 1.0 equiv.),  $\text{Pd}_2(\text{dba})_3$  (4 mol%),  $\text{PPh}_3$  (8 mol%), 2,5-DTBQ (0.11 mmol, 1.1 equiv.),  $\text{Mg}(\text{OTf})_2$  (10 mol%), **L<sub>3</sub>-PrAd** (10 mol%),  $\text{Na}_2\text{CO}_3$  (1.2 equiv.) in solvent (2.0 mL) at 50 °C for 24 h. The yield and diastereomeric ratio (*dr*) were determined via  $^1\text{H}$  NMR analysis of the crude reaction mixtures using 4-methylanisole as the internal standard. The enantiomeric ratio (*er*) was determined by chiral HPLC analysis. Compound **3a** was converted into its methyl ester derivative quantitatively with MeOH at 60 °C to determine its *er* value.

**Table S5: Screening of palladium catalyst**

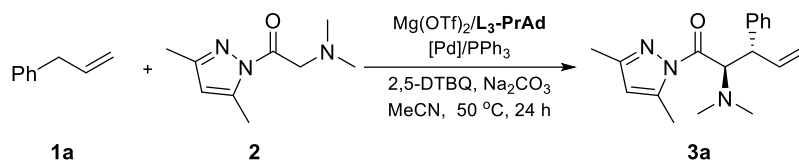

| Entry | [Pd]                                            | Yield | <i>dr</i> ( <i>anti:syn</i> ) | <i>er</i>   |
|-------|-------------------------------------------------|-------|-------------------------------|-------------|
| 1     | $\text{Pd}(\text{PPh}_3)_4$                     | trace | N.D.                          | N.D.        |
| 2     | $\text{Pd}(\text{MeCN})_2\text{Cl}_2$           | trace | N.D.                          | N.D.        |
| 3     | $\text{Pd}(\text{MeCN})_4(\text{BF}_4)_2$       | trace | N.D.                          | N.D.        |
| 4     | $\text{Pd}(\text{TFA})_2$                       | 48    | 3.5:1                         | 76:24/54:46 |
| 5     | $\text{Pd}_2(\text{dba})_3$                     | 55    | 5:1                           | 78:22/62:38 |
| 6     | $\text{Pd}_2(\text{dba})_3 \cdot \text{CHCl}_3$ | 69    | 4.5:1                         | 77:23/61:39 |

Reaction conditions: **1a** (0.2 mmol, 2.0 equiv), **2** (0.1 mmol, 1.0 equiv), [**Pd**] (4 or 8 mol% for dimer or monomer),  $\text{PPh}_3$  (8 mol%), 2,5-DTBQ (0.11 mmol, 1.1 equiv.),  $\text{Mg}(\text{OTf})_2$  (10 mol%), **L<sub>3</sub>-PrAd** (10 mol%), and  $\text{Na}_2\text{CO}_3$  (0.12 mmol, 1.2 equiv.) in MeCN (2.0 mL) at 50 °C for 24 h. The yield and diastereomeric ratio (*dr*) were determined via  $^1\text{H}$  NMR analysis of the crude reaction mixtures using 4-methylanisole as the internal standard. The enantiomeric ratio (*er*) was determined by chiral HPLC analysis. Compound **3a** was converted into its methyl ester derivative quantitatively with MeOH at 60 °C to determine its *er* value.

**Table S6: Screening of base**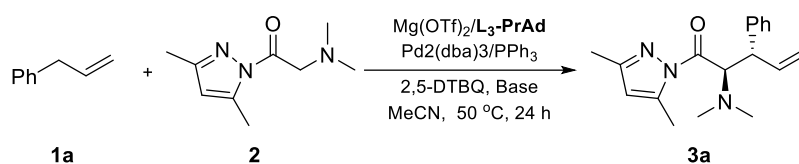

| Entry | Base                             | Yield      | <i>dr</i> ( <i>anti</i> : <i>syn</i> ) | <i>er</i>   |
|-------|----------------------------------|------------|----------------------------------------|-------------|
| 1     | DABCO                            | trace      | N.D. <sup>e</sup>                      | N.D.        |
| 2     | Et <sub>3</sub> N                | 29         | 1:1                                    | 65:35/55:45 |
| 3     | <sup>t</sup> Pr <sub>2</sub> NEt | 48         | 3.5:1                                  | 76:24/54:46 |
| 4     | KO <sup>t</sup> Bu               | trace      | N.D.                                   | N.D.        |
| 5     | LiOAc                            | No product | N.D.                                   | N.D.        |
| 6     | KOAc                             | 37         | 1:1                                    | 0/0         |
| 7     | K <sub>2</sub> CO <sub>3</sub>   | 59         | 1:1                                    | 53:47/52:48 |
| 8     | Na <sub>2</sub> CO <sub>3</sub>  | 55         | 5:1                                    | 78:22/62:38 |
| 9     | Na <sub>2</sub> HPO <sub>4</sub> | 47         | 3:1                                    | 77:24/61:39 |
| 10    | K <sub>2</sub> HPO <sub>4</sub>  | 52         | 4.5:1.                                 | 78:22/63:37 |
| 11    | No base                          | 41         | 3:1                                    | 80:20/62:38 |

Reaction conditions: **1a** (0.2 mmol, 2.0 equiv.), **2** (0.1 mmol, 1.0 equiv.), Pd<sub>2</sub>(dba)<sub>3</sub> (4 mol%), PPh<sub>3</sub> (8 mol%), 2,5-DTBQ (0.11 mmol, 1.1 equiv.), Mg(OTf)<sub>2</sub> (10 mol%), **L<sub>3</sub>-PrAd** (10 mol%), and base (0.12 mmol, 1.2 equiv.) in MeCN (2.0 mL) at 50 °C for 24 h. The yield and diastereomeric ratio (*dr*) were determined via <sup>1</sup>H NMR analysis of the crude reaction mixtures using 4-methylanisole as the internal standard. The enantiomeric ratio (*er*) was determined by chiral HPLC analysis. Compound **3a** was converted into its methyl ester derivative quantitatively with MeOH at 60 °C to determine its *er* value.

**Table S7: Screening of temperature**

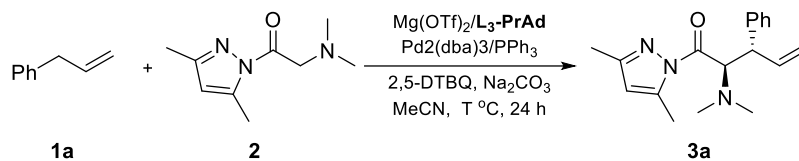

| Entry | T °C | Yield | <i>dr</i> ( <i>anti</i> : <i>syn</i> ) | <i>er</i>   |
|-------|------|-------|----------------------------------------|-------------|
| 1     | 50   | 55    | 5:1                                    | 78:22/62:38 |
| 2     | 45   | 50    | 4:1                                    | 80:20/65:35 |
| 3     | 40   | 58    | 6:1                                    | 82:18/67:33 |
| 4     | 35   | 19    | 7:1                                    | N.D.        |

Reaction conditions: **1a** (0.2 mmol, 2.0 equiv.), **2** (0.1 mmol, 1.0 equiv.),  $\text{Pd}_2(\text{dba})_3$  (4 mol%),  $\text{PPh}_3$  (8 mol%), 2,5-DTBQ (0.11 mmol, 1.1 equiv.),  $\text{Mg}(\text{OTf})_2$  (10 mol%), **L<sub>3</sub>-PrAd** (10 mol%), and  $\text{Na}_2\text{CO}_3$  (0.12 mmol, 1.2 equiv.) in MeCN (2.0 mL) at T °C for 24 h. The yield and diastereomeric ratio (*dr*) were determined via  $^1\text{H}$  NMR analysis of the crude reaction mixtures using 4-methylanisole as the internal standard. The enantiomeric ratio (*er*) was determined by chiral HPLC analysis. Compound **3a** was converted into its methyl ester derivative quantitatively with MeOH at 60 °C to determine its *er* value.

**Table S8: Optimization for reaction of dimethylglycine pyrazoleamide **1a** with allylbenzene **2**.**

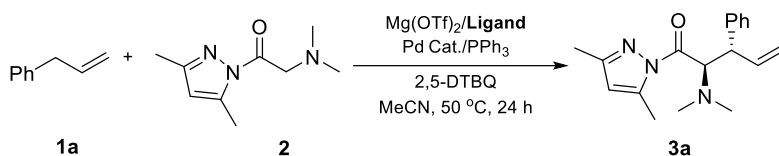

| Entry              | [Pd]                                                  | Additive                                 | Yield | <i>dr</i> ( <i>anti:syn</i> ) | <i>er</i>   |
|--------------------|-------------------------------------------------------|------------------------------------------|-------|-------------------------------|-------------|
| 1                  | Pd <sub>2</sub> dba <sub>3</sub>                      | -                                        | 47    | 3:1                           | 82:18/62:38 |
| 2 <sup>a</sup>     | Pd <sub>2</sub> dba <sub>3</sub>                      | -                                        | 60    | 4.5:1                         | 83:17/60:40 |
| 3 <sup>a</sup>     | Pd <sub>2</sub> (dba) <sub>3</sub> ·CHCl <sub>3</sub> | -                                        | 65    | 4.5:1                         | 84:16/60:40 |
| 4 <sup>a,b</sup>   | Pd <sub>2</sub> (dba) <sub>3</sub> ·CHCl <sub>3</sub> | -                                        | 62    | 5:1                           | 87:13/63:37 |
| 5 <sup>a,b,c</sup> | Pd <sub>2</sub> (dba) <sub>3</sub> ·CHCl <sub>3</sub> | -                                        | 56    | 5:1                           | 93:7/60:40  |
| 6 <sup>a,b,c</sup> | Pd <sub>2</sub> (dba) <sub>3</sub> ·CHCl <sub>3</sub> | 40 mg 4Å MS                              | trace | N.D. <sup>e</sup>             | N.D.        |
| 7 <sup>a,b,c</sup> | Pd <sub>2</sub> (dba) <sub>3</sub> ·CHCl <sub>3</sub> | TBAB                                     | trace | N.D.                          | N.D.        |
| 8 <sup>a,b,c</sup> | Pd <sub>2</sub> (dba) <sub>3</sub> ·CHCl <sub>3</sub> | 15% mmol NaBAR <sup>F</sup> <sub>4</sub> | 67    | 8:1                           | 95:5/-      |

Reaction conditions: **1a** (0.2 mmol, 2.0 equiv.), **2** (0.1 mmol, 1.0 equiv.), [**Pd**] (4 or 8 mol% for dimer or monomer), PPh<sub>3</sub> (8 mol%), 2,5-DTBQ (0.11 mmol, 1.1 equiv.), Mg(OTf)<sub>2</sub> (10 mol%), **L3-PrAd** (10 mol%), and Na<sub>2</sub>CO<sub>3</sub> (0.12 mmol, 1.2 equiv.) in MeCN (2.0 mL) at T °C for 24 h. The yield and diastereomeric ratio (*dr*) were determined via <sup>1</sup>H NMR analysis of the crude reaction mixtures using 4-methylanisole as the internal standard. The enantiomeric ratio (*er*) was determined by chiral HPLC analysis. Compound **3a** was converted into its methyl ester derivative quantitatively with MeOH at 60 °C to determine its *er* value. [a] 2,5-DTBQ (1.5 equiv.). [b] At 20 °C for 72 h. [c] No base.

**Table S9: Screening of achiral phosphorus ligands**

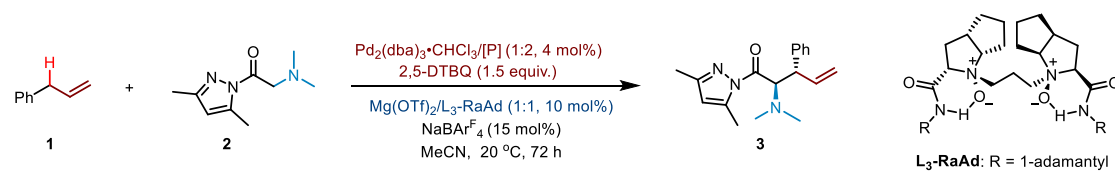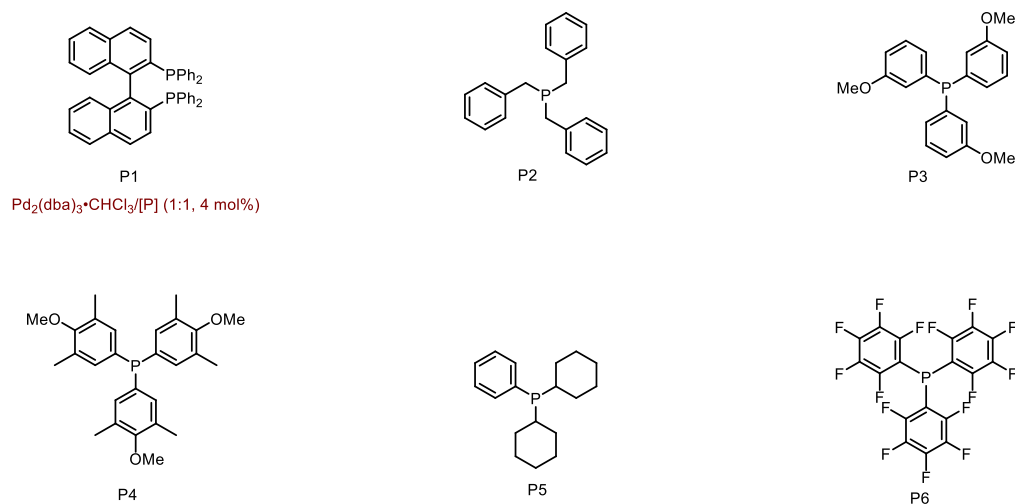

| Entry | [P] | Yield |
|-------|-----|-------|
| 1     | P1  | N.D.  |
| 2     | P2  | trace |
| 3     | P3  | trace |
| 4     | P4  | trace |
| 5     | P5  | <10%  |
| 6     | P6  | N.D.  |

Reaction conditions: **1a** (0.2 mmol, 2.0 equiv.), **2** (0.1 mmol, 1.0 equiv.),  $\text{Pd}_2(\text{dba})_3 \cdot \text{CHCl}_3$  (4 mol%), [P] (4 or 8 mol% for dimer or monomer), 2,5-DTBQ (0.15 mmol, 1.5 equiv.),  $\text{Mg}(\text{OTf})_2$  (10 mol%),  $\text{L}_3\text{-PrAd}$  (10 mol%) in MeCN (2.0 mL) at 20 °C for 72 h. The yield was determined via  $^1\text{H}$  NMR analysis of the crude reaction mixtures using 4-methylanisole as the internal standard.

## 5. Scope Limitation

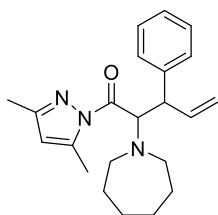

trace

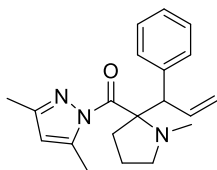

trace

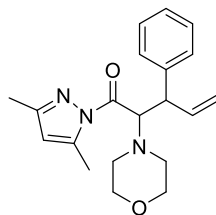

trace

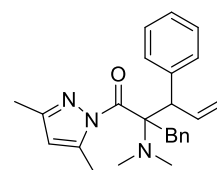

N.D.

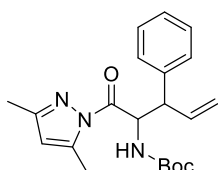

N.D.

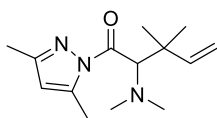

N.D.

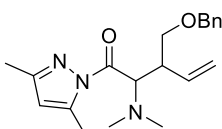

N.D.

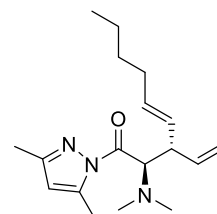

N.D.

## 6. General procedure for synthesis of [2,3]-rearrangement products

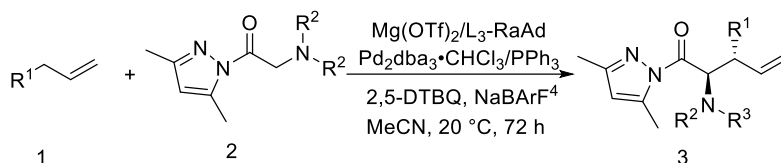

Under an Ar atmosphere, a tube was added Mg(OTf)<sub>2</sub> (0.02 mmol, 10mol%), *N,N'*-dioxide ligand **L<sub>3</sub>-RaAd** (0.02 mmol, 10 mol%), amino amide **2** (0.2 mmol, 1.0 equiv.) and MeCN (1.5 mL). Another tube was added Pd<sub>2</sub>(dba)<sub>3</sub>·CHCl<sub>3</sub> (4 mol%), PPh<sub>3</sub> (8 mol%) and MeCN (0.5 mL). After being stirred at 35 °C for 1 h, two tubes were mixed. Then, 2,5-DTBQ (1.5 equiv.), terminal alkene **1** (0.4 mmol, 2.0 equiv.) and MeCN (2.0 mL) were added sequentially. The reaction mixture was stirred at 20 °C for 48-72 h. After the reaction was completed, the suspension was filtered through a celite pad. The filtrate was concentrated under vacuum, and the residue was purified by silica gel chromatography to give the desired product **3**.

The product **3** was dissolved in 1.0 mL of methanol. The reaction was stirred at 60 °C overnight. The reaction mixture was subjected to column chromatography on silica gel to afford the corresponding methyl ester derivative. The *er* value was determined by HPLC using a Daicel chiral column. The analytical data of the products were summarized below.



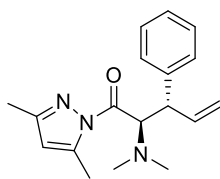

**(2R,3S)-1-(3,5-dimethyl-1H-pyrazol-1-yl)-2-(dimethylamino)-3-phenylpent-4-en-1-one (3a):**

Following the general procedure, the reaction was conducted at 0.2 mmol scale, product **3a** was obtained as a colorless liquid (38.1 mg, 64% yield, *anti:syn* = 8:1).

**TLC:**  $R_f = 0.7$  (petroleum ether/ethyl acetate 10/1).

$[\alpha]_D^{28} = +49.7$  ( $c = 0.40$ , in  $\text{CH}_2\text{Cl}_2$ ).

**$^1\text{H NMR}$**  (400 MHz,  $\text{CDCl}_3$ )  $\delta$  7.25-7.20 (m, 2H), 7.18-7.11 (m, 2H), 7.09-7.03 (m, 1H), 6.25 – 6.14 (m, 1H), 5.77 (s, 1H), 5.36 (d,  $J = 11.7$  Hz, 1H), 5.18 – 5.09 (m, 2H), 3.91 (m, 1H), 2.44 (s, 6H), 2.31 (s, 3H), 2.17 (s, 3H).

**$^{13}\text{C NMR}$**  (101 MHz,  $\text{CDCl}_3$ )  $\delta$  171.0, 151.3, 143.3, 140.4, 139.7, 128.5, 128.3, 126.6, 115.9, 111.2, 66.4, 49.9, 41.3, 14.4, 13.8.

**HRMS**  $m/z$   $[\text{M}+\text{H}]^+$  calcd for  $\text{C}_{18}\text{H}_{24}\text{N}_3\text{O}^+$  = 298.1919, found 298.1920.

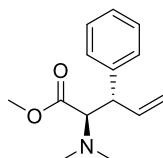

**Methyl (2R,3S)-2-(dimethylamino)-3-phenylpent-4-enoate (3a-methyl ester):** Following the general procedure, product **3a-methyl ester** was obtained as a colorless liquid, 22.4 mg, 48% yield in two steps,

**TLC:**  $R_f = 0.6$  (petroleum ether/ethyl acetate 10/1).

$[\alpha]_D^{28} = +26.1$  ( $c = 0.12$ , in  $\text{CH}_2\text{Cl}_2$ ).

**$^1\text{H NMR}$**  (400 MHz,  $\text{CDCl}_3$ )  $\delta$  = 7.30 – 7.25 (m, 2H), 7.23 – 7.16 (m, 3H), 6.12 (m, 1H), 5.19 – 5.04 (m, 2H), 3.82 – 3.68 (m, 1H), 3.58 (d,  $J = 11.7$  Hz, 1H), 3.42 (s, 3H), 2.40 (s, 6H).

**$^{13}\text{C NMR}$**  (101 MHz,  $\text{CDCl}_3$ )  $\delta$  = 170.3, 140.8, 138.9, 128.6, 128.3, 126.9, 116.2, 71.8, 50.6, 49.8, 41.4.

**HPLC:** 95:5 *er*, chiral stationary column: OJ-H, mobile phase: hexane/ $i$ PrOH = 99/1, flow rate 0.8 mL/min,  $\lambda = 254$  nm, 30 °C, major isomer:  $t_r$  (major) = 6.3 min,  $t_r$  (minor) = 7.4 min.

**HRMS**  $m/z$   $[\text{M}+\text{H}]^+$  calcd for  $\text{C}_{14}\text{H}_{20}\text{NO}_2^+$  = 234.1494, found 234.1493.

### Racemic **3a**-methyl ester

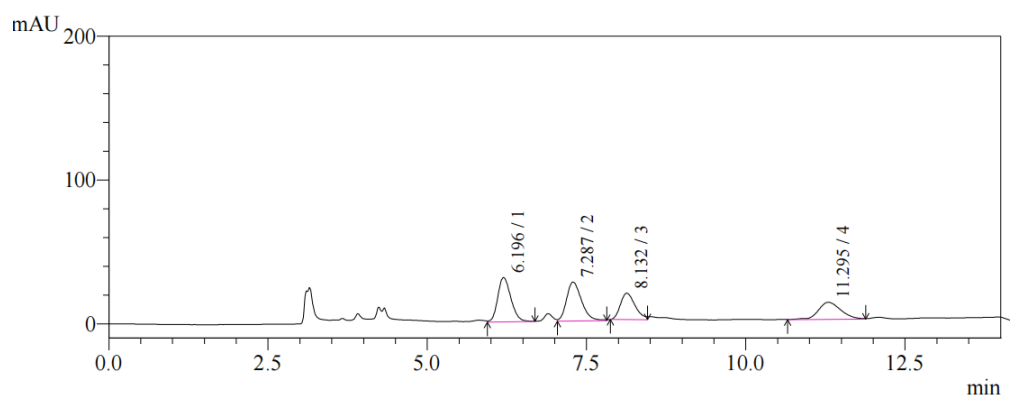

1 PDA Multi 1 / 254nm,4nm

PeakTable

PDA Ch1 254nm

| Peak# | Ret. Time | Area    | Height | Area %  | Height % |
|-------|-----------|---------|--------|---------|----------|
| 1     | 6.196     | 445606  | 30889  | 30.068  | 34.995   |
| 2     | 7.287     | 449643  | 27207  | 30.341  | 30.823   |
| 3     | 8.132     | 295599  | 18377  | 19.946  | 20.819   |
| 4     | 11.295    | 291136  | 11795  | 19.645  | 13.363   |
| Total |           | 1481983 | 88268  | 100.000 | 100.000  |

### Enantioenriched **3a**-methyl ester

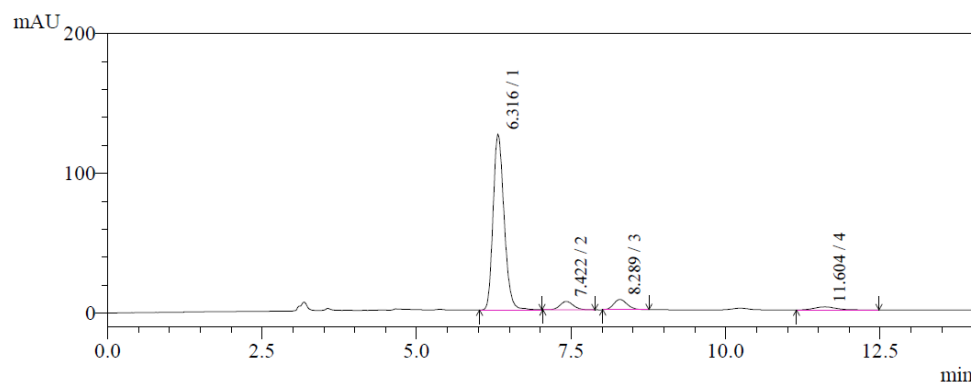

1 PDA Multi 1 / 220nm,4nm

PeakTable

PDA Ch1 220nm

| Peak# | Ret. Time | Area    | Height | Area %  | Height % |
|-------|-----------|---------|--------|---------|----------|
| 1     | 6.316     | 1561485 | 125926 | 85.963  | 88.994   |
| 2     | 7.422     | 88696   | 5972   | 4.883   | 4.220    |
| 3     | 8.289     | 112649  | 7394   | 6.202   | 5.225    |
| 4     | 11.604    | 53640   | 2208   | 2.953   | 1.560    |
| Total |           | 1816469 | 141499 | 100.000 | 100.000  |

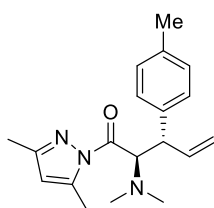

**(2R,3S)-1-(3,5-dimethyl-1H-pyrazol-1-yl)-2-(dimethylamino)-3-(p-tolyl)pent-4-en-1-one (3b)**

Following the general procedure, the reaction was conducted at 0.2 mmol scale, product **3b** was obtained as a colorless liquid (25.0 mg, 40% yield, *anti:syn* = 7:1).

**TLC:**  $R_f$  = 0.6 (petroleum ether/ethyl acetate 10/1).

$[\alpha]_D^{28}$  = +66.7 ( $c$  = 0.14, in  $\text{CH}_2\text{Cl}_2$ ).

**$^1\text{H}$  NMR (500 MHz,  $\text{CDCl}_3$ )**  $\delta$  7.12 (d,  $J$  = 8.1 Hz, 2H), 6.96 (d,  $J$  = 7.9 Hz, 2H), 6.21 – 6.12 (m, 1H), 5.79 (s, 1H), 5.34 (d,  $J$  = 11.7 Hz, 1H), 5.11 (s, 1H), 5.09 (d,  $J$  = 4.2 Hz, 1H), 3.88 (dd,  $J$  = 11.7, 8.6 Hz, 1H), 2.43 (s, 6H), 2.32 (s, 3H), 2.21 (s, 3H), 2.18 (s, 3H).

**$^{13}\text{C}$  NMR (101 MHz,  $\text{CDCl}_3$ )**  $\delta$  170.9, 151.3, 143.4, 140.0, 137.4, 136.1, 129.0, 128.3, 115.6, 111.2, 66.3, 49.4, 41.3, 21.0, 14.4, 13.9.

**HPLC:** 93:7 *er*, chiral stationary column: AD-H, mobile phase: hexane/*i*PrOH = 99/1, flow rate 0.5 mL/min,  $\lambda$  = 254 nm, 30 °C,  $t_r$  (major) = 8.6 min,  $t_r$  (minor) = 8.2 min.

**HRMS**  $m/z$   $[\text{M}+\text{H}]^+$  calcd for  $\text{C}_{19}\text{H}_{26}\text{N}_3\text{O}^+$  = 312.2076, found 312.2076.

### Racemic **3b**

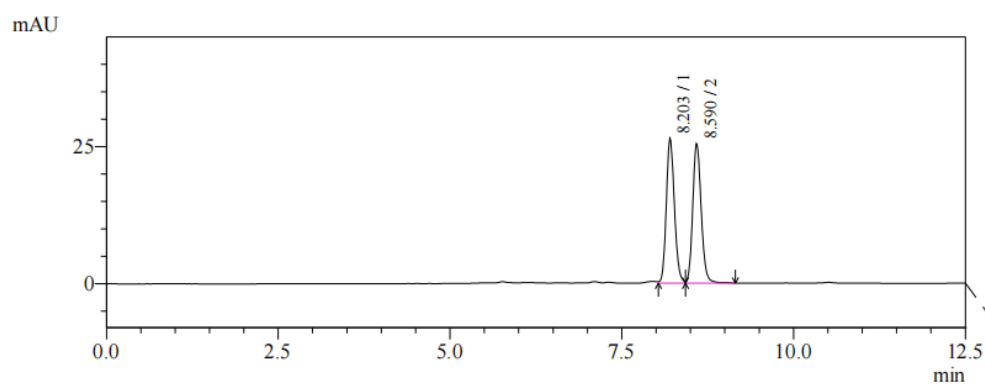

1 PDA Multi 1 / 254nm,4nm

PeakTable

| PDA Ch1 254nm |           |        |        |         |          |
|---------------|-----------|--------|--------|---------|----------|
| Peak#         | Ret. Time | Area   | Height | Area %  | Height % |
| 1             | 8.203     | 216224 | 26399  | 49.761  | 50.913   |
| 2             | 8.590     | 218300 | 25452  | 50.239  | 49.087   |
| Total         |           | 434524 | 51851  | 100.000 | 100.000  |

### Enantioenriched **3b**

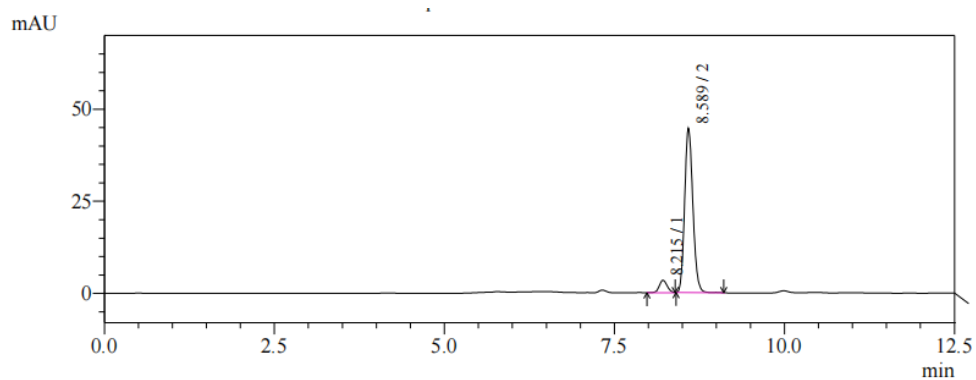

1 PDA Multi 1 / 254nm,4nm

PeakTable

| PDA Ch1 254nm |           |        |        |         |          |
|---------------|-----------|--------|--------|---------|----------|
| Peak#         | Ret. Time | Area   | Height | Area %  | Height % |
| 1             | 8.215     | 28904  | 3426   | 7.127   | 7.124    |
| 2             | 8.589     | 376632 | 44664  | 92.873  | 92.876   |
| Total         |           | 405536 | 48090  | 100.000 | 100.000  |

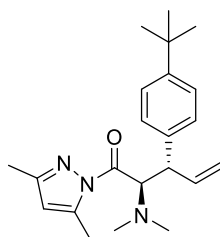

**(2R,3S)-3-(4-(*tert*-butyl)phenyl)-1-(3,5-dimethyl-1H-pyrazol-1-yl)-2-(dimethylamino)pent-4-en-1-one (3c)** Following the general procedure, the reaction was conducted at 0.2 mmol scale, product **3c** was obtained as a colorless liquid (49.8 mg, 70% yield, *anti:syn* =9:1).

**TLC:**  $R_f$  = 0.7 (petroleum ether/ethyl acetate 10/1).

$[\alpha]_D^{28}$  = +44.8 ( $c$  = 0.21, in  $\text{CH}_2\text{Cl}_2$ ).

**$^1\text{H NMR}$**  (400 MHz,  $\text{CDCl}_3$ )  $\delta$  7.16-7.09 (m, 4H), 6.18 (m, 1H), 5.74 (s, 1H), 5.31 (d,  $J$  = 11.6 Hz, 1H), 5.16-5.10 (m, 2H), 3.93-3.80 (m, 1H), 2.46 (s, 6H), 2.27 (s, 3H), 2.17 (s, 3H), 1.20 (s, 9H).

**$^{13}\text{C NMR}$**  (101 MHz,  $\text{CDCl}_3$ )  $\delta$  170.5, 150.1, 148.2, 142.2, 138.7, 136.0, 126.9, 124.0, 114.6, 109.9, 65.5, 48.6, 40.3, 33.2, 30.2, 13.2, 12.7.

**HRMS**  $m/z$   $[\text{M}+\text{H}]^+$  calcd for  $\text{C}_{22}\text{H}_{32}\text{N}_3\text{O}^+$  = 354.2545, found 354.2546.

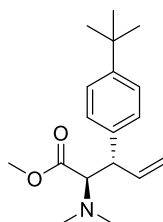

**Methyl (2R,3S)-3-(4-(*tert*-butyl)phenyl)-2-(dimethylamino)pent-4-enoate (3c-methyl ester):** Following the general procedure, product **3c-methyl ester** was obtained as a colorless liquid, 35.9 mg, 62% yield in two steps,

**TLC:**  $R_f$  = 0.6 (petroleum ether/ethyl acetate 10/1).

$[\alpha]_D^{28}$  = +63.8 ( $c$  = 0.28, in  $\text{CH}_2\text{Cl}_2$ ).

**$^1\text{H NMR}$**  (400 MHz,  $\text{CDCl}_3$ )  $\delta$  7.30 – 7.26 (m, 3H), 7.14 – 7.08 (m, 2H), 6.18 – 6.02 (m, 1H), 5.19 – 5.05 (m, 2H), 3.73 (dd,  $J$  = 12.0, 8.5 Hz, 1H), 3.56 (d,  $J$  = 11.6 Hz, 1H), 3.41 (s, 3H), 2.39 (s, 6H), 1.28 (s, 9H).

**$^{13}\text{C NMR}$**  (101 MHz,  $\text{CDCl}_3$ )  $\delta$  170.4, 149.7, 139.1, 137.6, 127.7, 125.5, 115.9, 71.8, 50.6, 49.4, 41.4, 34.4, 31.4.

**HPLC:** 94:6 *er*, chiral stationary column: OD-H, mobile phase: hexane/ $^i$ PrOH = 99/1, flow rate 1.0 mL/min,  $\lambda$  = 254 nm, 30 °C,  $t_r$  (major) = 3.9 min,  $t_r$  (minor) = 4.2 min.

**HRMS**  $m/z$   $[\text{M}+\text{H}]^+$  calcd for  $\text{C}_{18}\text{H}_{28}\text{NO}_2^+$  = 290.2115, found 290.2116.

### Racemic **3c**-methyl ester

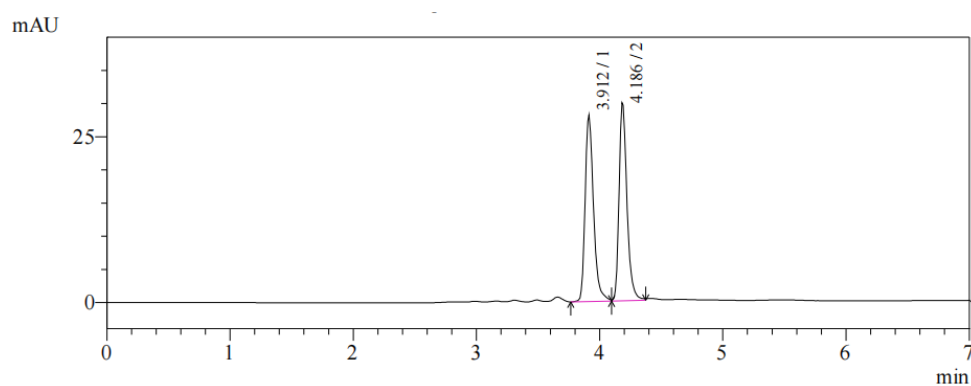

1 PDA Multi 1 / 254nm,4nm

PeakTable

| Peak# | Ret. Time | Area   | Height | Area %  | Height % |
|-------|-----------|--------|--------|---------|----------|
| 1     | 3.912     | 132809 | 28167  | 50.014  | 48.532   |
| 2     | 4.186     | 132734 | 29871  | 49.986  | 51.468   |
| Total |           | 265543 | 58039  | 100.000 | 100.000  |

### Enantioenriched **3c**-methyl ester

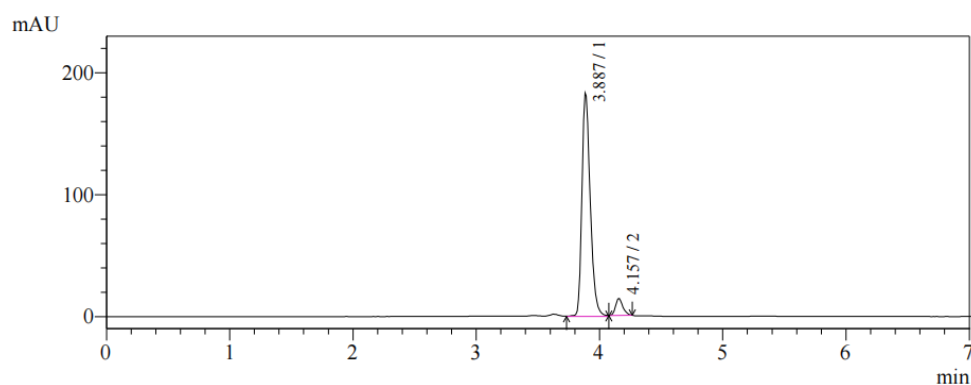

1 PDA Multi 1 / 254nm,4nm

PeakTable

| Peak# | Ret. Time | Area   | Height | Area %  | Height % |
|-------|-----------|--------|--------|---------|----------|
| 1     | 3.887     | 864134 | 183429 | 93.755  | 92.929   |
| 2     | 4.157     | 57562  | 13958  | 6.245   | 7.071    |
| Total |           | 921696 | 197387 | 100.000 | 100.000  |

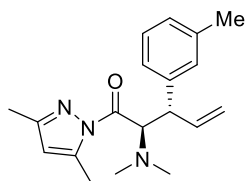

**(2*S*,3*R*)-1-(3,5-dimethyl-1*H*-pyrazol-1-yl)-2-(dimethylamino)-3-(*m*-tolyl)pent-4-en-1-one**

**(3d):** Following the general procedure, the reaction was conducted at 0.2 mmol scale, product **3d** was obtained as a colorless liquid (44.0 mg, 71% yield, *anti:syn* >19:1).

**TLC:**  $R_f = 0.7$  (petroleum ether/ethyl acetate 10/1).

$[\alpha]_D^{28} = +54.9$  ( $c = 0.46$ , in  $\text{CH}_2\text{Cl}_2$ ).

**$^1\text{H NMR}$**  (400 MHz,  $\text{CDCl}_3$ )  $\delta$  7.09 – 6.98 (m, 3H), 6.87 (d,  $J = 6.0$  Hz, 1H), 6.26 – 6.09 (m, 1H), 5.77 (s, 1H), 5.36 (d,  $J = 11.7$  Hz, 1H), 5.17 – 5.10 (m, 2H), 3.87 (dd,  $J = 11.7, 8.7$  Hz, 1H), 2.45 (s, 6H), 2.30 (s, 3H), 2.21 (s, 3H), 2.18 (s, 3H).

**$^{13}\text{C NMR}$**  (101 MHz,  $\text{CDCl}_3$ )  $\delta$  171.3, 151.3, 143.3, 140.1, 139.8, 137.8, 129.3, 128.1, 127.4, 125.5, 115.8, 111.1, 66.3, 50.0, 41.3, 21.3, 14.4, 13.8.

**HRMS**  $m/z$   $[\text{M}+\text{H}]^+$  calcd for  $\text{C}_{19}\text{H}_{26}\text{N}_3\text{O}^+$  = 312.2076, found 312.2072.

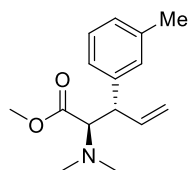

**Methyl (2*R*,3*S*)-2-(dimethylamino)-3-(*m*-tolyl)pent-4-enoate (3d-methyl ester):** Following the general procedure, product **3d-methyl ester** was obtained as a colorless liquid, 31.5 mg, 64% yield in two steps,

**TLC:**  $R_f = 0.6$  (petroleum ether/ethyl acetate 10/1).

$[\alpha]_D^{28} = +41.6$  ( $c = 0.30$ , in  $\text{CH}_2\text{Cl}_2$ ).

**$^1\text{H NMR}$**  (400 MHz,  $\text{CDCl}_3$ )  $\delta$  7.19-7.12 (m, 1H), 7.04-6.96 (m, 3H), 6.18-6.03 (m, 1H), 5.17 – 5.06 (m, 2H), 3.75 – 3.68 (m, 1H), 3.57 (d,  $J = 11.7$  Hz, 1H), 3.43 (s, 3H), 2.39 (s, 6H), 2.31 (s, 3H).

**$^{13}\text{C NMR}$**  (101 MHz,  $\text{CDCl}_3$ )  $\delta = 170.3, 140.8, 139.1, 138.2, 129.0, 128.5, 127.7, 125.2, 116.0, 71.7, 50.6, 49.8, 41.4, 21.5$ .

**HPLC:** 93.5:6.5 *er*, chiral stationary column: OJ-H, mobile phase: hexane/ $i$ PrOH = 99.5/0.5, flow rate 1.0 mL/min,  $\lambda = 254$  nm, 30 °C, major isomer:  $t_r$  (major) = 5.2 min,  $t_r$  (minor) = 5.9 min.

**HRMS**  $m/z$   $[\text{M}+\text{H}]^+$  calcd for  $\text{C}_{15}\text{H}_{22}\text{NO}_2^+$  = 248.1651, found 248.1646.

### Racemic **3d**-methyl ester

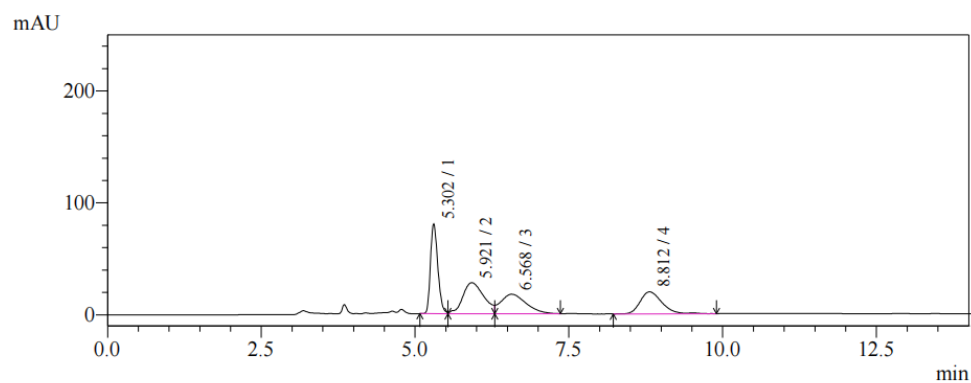

PeakTable

PDA Ch1 254nm

| Peak# | Ret. Time | Area    | Height | Area %  | Height % |
|-------|-----------|---------|--------|---------|----------|
| 1     | 5.302     | 666116  | 80217  | 28.980  | 55.334   |
| 2     | 5.921     | 656847  | 27690  | 28.577  | 19.101   |
| 3     | 6.568     | 492649  | 17374  | 21.433  | 11.984   |
| 4     | 8.812     | 482926  | 19689  | 21.010  | 13.581   |
| Total |           | 2298538 | 144969 | 100.000 | 100.000  |

### Enantioenriched **3d**-methyl ester

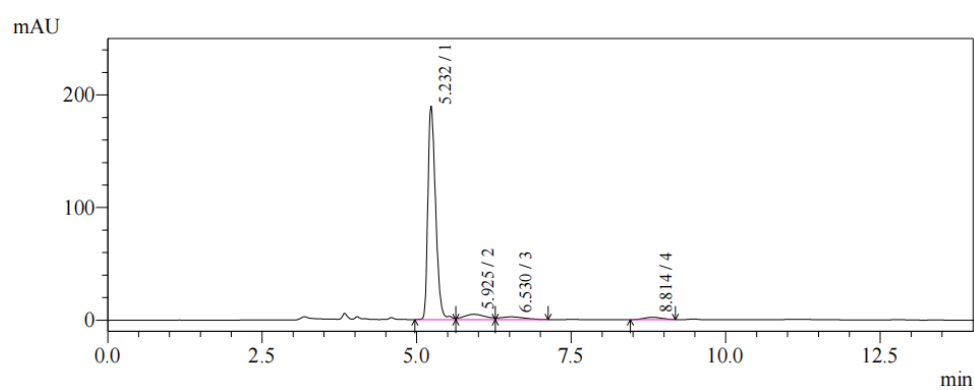

PeakTable

PDA Ch1 254nm

| Peak# | Ret. Time | Area    | Height | Area %  | Height % |
|-------|-----------|---------|--------|---------|----------|
| 1     | 5.232     | 1656741 | 189413 | 88.184  | 95.382   |
| 2     | 5.925     | 114247  | 4669   | 6.081   | 2.351    |
| 3     | 6.530     | 65555   | 2388   | 3.489   | 1.203    |
| 4     | 8.814     | 42182   | 2114   | 2.245   | 1.064    |
| Total |           | 1878725 | 198583 | 100.000 | 100.000  |



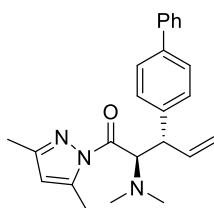

**(2R,3S)-3-([1,1'-biphenyl]-4-yl)-1-(3,5-dimethyl-1H-pyrazol-1-yl)-2-(dimethylamino)pent-4-en-1-one (3e):** Following the general procedure, the reaction was conducted at 0.2 mmol scale, product **3e** was obtained as a colorless liquid (53.0 mg, 71% yield, *anti:syn* = 6:1).

**TLC:**  $R_f$  = 0.6 (petroleum ether/ethyl acetate 10/1).

$[\alpha]_D^{28}$  = +78.5 ( $c$  = 0.40, in  $\text{CH}_2\text{Cl}_2$ ).

**$^1\text{H NMR}$**  (400 MHz,  $\text{CDCl}_3$ )  $\delta$  = 7.52 – 7.46 (m, 2H), 7.41 – 7.35 (m, 4H), 7.33 – 7.27 (m, 3H), 6.29 – 6.15 (m, 1H), 5.77 (s, 1H), 5.39 (d,  $J$  = 11.7 Hz, 1H), 5.22 – 5.12 (m, 2H), 3.99 – 3.94 (m, 1H), 2.46 (s, 6H), 2.32 (s, 3H), 2.17 (s, 3H).

**$^{13}\text{C NMR}$**  (101 MHz,  $\text{CDCl}_3$ )  $\delta$  = 171.0, 151.4, 143.4, 140.9, 139.7, 139.6, 139.4, 128.9, 128.7, 127.1, 127.0, 127.0, 116.0, 111.3, 66.4, 49.6, 41.4, 14.4, 13.9.

**HPLC:** 95:5 *er*, chiral stationary column: AD-H, mobile phase: hexane/*i*PrOH = 99.5/0.5, flow rate 1.0 mL/min,  $\lambda$  = 254 nm, 30 °C,  $t_r$  (major) = 6.1 min,  $t_r$  (minor) = 5.2 min.

**HRMS**  $m/z$   $[\text{M}+\text{H}]^+$  calcd for  $\text{C}_{24}\text{H}_{28}\text{N}_3\text{O}^+$  = 374.2227, found 374.2229.

### Racemic **3e**

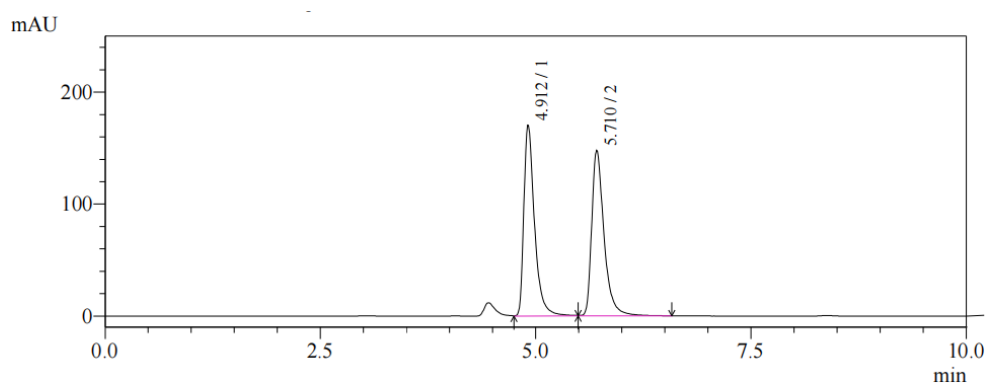

1 PDA Multi 1 / 254nm,4nm

PeakTable

PDA Ch1 254nm

| Peak# | Ret. Time | Area    | Height | Area %  | Height % |
|-------|-----------|---------|--------|---------|----------|
| 1     | 4.912     | 1474243 | 170445 | 49.979  | 53.520   |
| 2     | 5.710     | 1475477 | 148027 | 50.021  | 46.480   |
| Total |           | 2949720 | 318472 | 100.000 | 100.000  |

### Enantioenriched **3e**

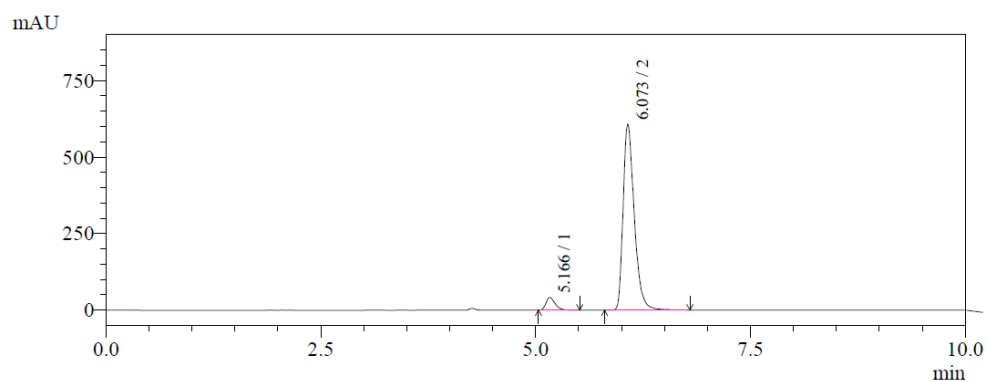

1 PDA Multi 1 / 254nm,4nm

PeakTable

PDA Ch1 254nm

| Peak# | Ret. Time | Area    | Height | Area %  | Height % |
|-------|-----------|---------|--------|---------|----------|
| 1     | 5.166     | 310006  | 41507  | 5.355   | 6.396    |
| 2     | 6.073     | 5478892 | 607479 | 94.645  | 93.604   |
| Total |           | 5788899 | 648985 | 100.000 | 100.000  |

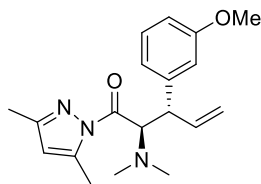

**(2R,3S)-1-(3,5-dimethyl-1H-pyrazol-1-yl)-2-(dimethylamino)-3-(3-methoxyphenyl)pent-4-en-1-one (3f):** Following the general procedure, the reaction was conducted at 0.2 mmol scale, product **3f** was obtained as a colorless liquid (42.0 mg, 64% yield, *anti:syn* = 10:1).

**TLC:**  $R_f$  = 0.8 (petroleum ether/ethyl acetate 10/1).

$[\alpha]_D^{20}$  = +75.7 ( $c$  = 0.74, in  $\text{CH}_2\text{Cl}_2$ ).

**$^1\text{H NMR}$**  (400 MHz,  $\text{CDCl}_3$ )  $\delta$  7.10 (t,  $J$  = 7.9 Hz, 1H), 6.88 – 6.82 (m, 2H), 6.70 – 6.62 (m, 1.0 Hz, 1H), 6.26 – 6.15 (m, 1H), 5.83 (d,  $J$  = 1.1 Hz, 1H), 5.42 (d,  $J$  = 11.8 Hz, 1H), 5.19 (dd,  $J$  = 2.0, 1.0 Hz, 1H), 5.18 – 5.14 (m, 1H), 3.93 (dd,  $J$  = 11.8, 8.5 Hz, 1H), 3.73 (s, 3H), 2.48 (s, 6H), 2.36 (d,  $J$  = 1.1 Hz, 3H), 2.21 (s, 3H).

**$^{13}\text{C NMR}$**  (101 MHz,  $\text{CDCl}_3$ )  $\delta$  171.6, 170.8, 159.7, 159.5, 151.6, 151.3, 143.6, 143.4, 143.0, 141.9, 139.6, 138.6, 129.5, 129.3, 121.1, 120.7, 116.6, 115.9, 114.6, 113.1, 113.0, 111.6, 111.4, 111.2, 66.1, 65.8, 55.2, 55.1, 50.2, 49.9, 41.3, 14.7, 14.4, 14.0, 13.8.

**HPLC:** 95:5 *er*, chiral stationary column: AD, mobile phase: hexane/ $i$ PrOH = 99.5/0.5, flow rate 1.0 mL/min,  $\lambda$  = 254 nm, 30 °C,  $t_r$  (major) = 6.4 min,  $t_r$  (minor) = 7.5 min.

**HRMS**  $m/z$   $[\text{M}+\text{H}]^+$  calcd for  $\text{C}_{19}\text{H}_{26}\text{N}_3\text{O}_2^+$  = 328.2020, found 328.2019.

Racemic **3f**

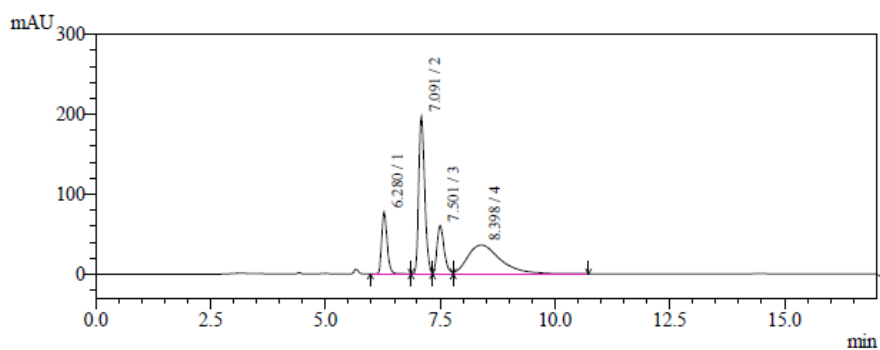

1 PDA Multi 1 / 254nm,4nm

PeakTable

| PDA Ch1 254nm |           |         |        |         |          |  |
|---------------|-----------|---------|--------|---------|----------|--|
| Peak#         | Ret. Time | Area    | Height | Area %  | Height % |  |
| 1             | 6.280     | 639648  | 77720  | 13.001  | 20.888   |  |
| 2             | 7.091     | 1809276 | 197633 | 36.774  | 53.115   |  |
| 3             | 7.501     | 659902  | 60702  | 13.413  | 16.314   |  |
| 4             | 8.398     | 1811197 | 36029  | 36.813  | 9.683    |  |
| Total         |           | 4920023 | 372084 | 100.000 | 100.000  |  |

Enantioenriched **3f**

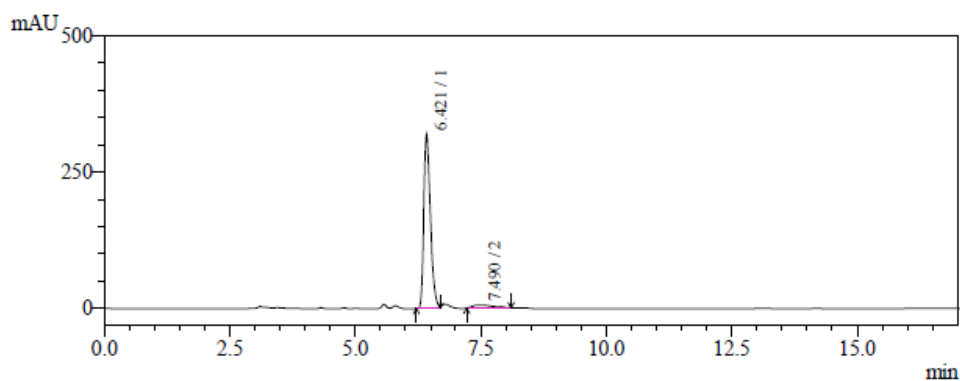

1 PDA Multi 1 / 254nm,4nm

PeakTable

| PDA Ch1 254nm |           |         |        |         |          |  |
|---------------|-----------|---------|--------|---------|----------|--|
| Peak#         | Ret. Time | Area    | Height | Area %  | Height % |  |
| 1             | 6.421     | 2949775 | 319695 | 94.989  | 98.318   |  |
| 2             | 7.490     | 155620  | 5470   | 5.011   | 1.682    |  |
| Total         |           | 3105395 | 325166 | 100.000 | 100.000  |  |

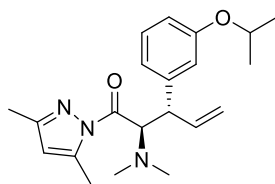

**(2R,3S)-1-(3,5-dimethyl-1H-pyrazol-1-yl)-2-(dimethylamino)-3-(3-isopropoxyphenyl)pent-4-en-1-one (3g):** Following the general procedure, the reaction was conducted at 0.2 mmol scale, product **3g** was obtained as a colorless liquid (42.0 mg, 59% yield, *anti:syn* = 15:1).

**TLC:**  $R_f$  = 0.6 (petroleum ether/ethyl acetate 10/1).

$[\alpha]_D^{20}$  = +99.9 ( $c$  = 0.24, in  $\text{CH}_2\text{Cl}_2$ ).

**$^1\text{H NMR}$**  (400 MHz,  $\text{CDCl}_3$ )  $\delta$  7.08 (t,  $J$  = 7.8 Hz, 1H), 6.82 (d,  $J$  = 7.8 Hz, 2H), 6.64 (dd,  $J$  = 8.3, 1.6 Hz, 1H), 6.27 – 6.14 (m, 1H), 5.82 (s, 1H), 5.39 (d,  $J$  = 11.7 Hz, 1H), 5.20 – 5.13 (m, 2H), 4.51 – 4.40 (m, 1H), 3.91 (dd,  $J$  = 11.7, 8.6 Hz, 1H), 2.47 (s, 6H), 2.36 (s, 3H), 2.20 (s, 3H), 1.29 (d,  $J$  = 6.0 Hz, 3H), 1.24 (d,  $J$  = 6.0 Hz, 3H).

**$^{13}\text{C NMR}$**  (101 MHz,  $\text{CDCl}_3$ )  $\delta$  170.9, 157.8, 151.3, 143.4, 141.8, 139.6, 129.3, 121.1, 115.9, 115.3, 115.1, 111.2, 69.7, 66.2, 49.9, 41.3, 22.1, 22.0, 14.4, 13.8.

**HPLC:** 93:7 *er*, chiral stationary column: OD, mobile phase: hexane/ $i$ PrOH = 99.7/0.3, flow rate 0.5 mL/min,  $\lambda$  = 254 nm, 30 °C,  $t_r$  (major) = 16.3 min,  $t_r$  (minor) = 19.1 min.

**HRMS**  $m/z$   $[\text{M}+\text{H}]^+$  calcd for  $\text{C}_{21}\text{H}_{30}\text{N}_3\text{O}_2^+$  = 356.2333, found 356.2332.

Racemic **3g**

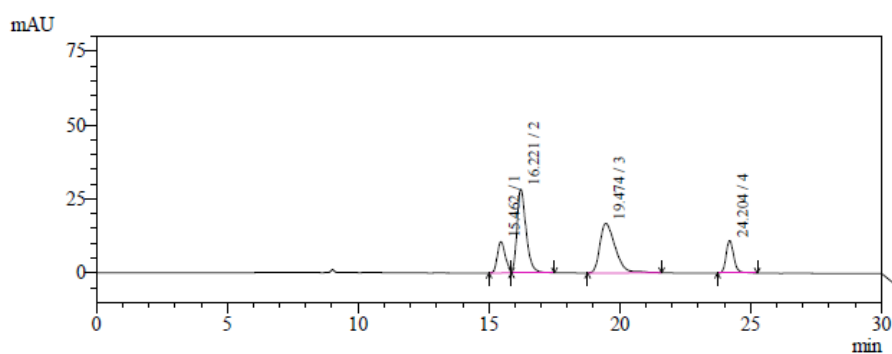

1 PDA Multi 1 / 254nm,4nm

PeakTable

| PDA Ch1 254nm |           |         |        |         |          |
|---------------|-----------|---------|--------|---------|----------|
| Peak#         | Ret. Time | Area    | Height | Area %  | Height % |
| 1             | 15.462    | 227498  | 10587  | 12.426  | 15.867   |
| 2             | 16.221    | 685805  | 28355  | 37.460  | 42.495   |
| 3             | 19.474    | 689733  | 16741  | 37.675  | 25.090   |
| 4             | 24.204    | 227717  | 11042  | 12.438  | 16.548   |
| Total         |           | 1830753 | 66725  | 100.000 | 100.000  |

Enantioenriched **3g**

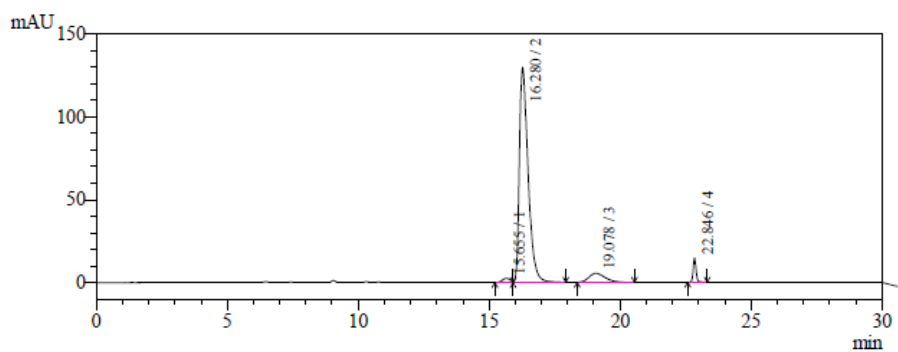

1 PDA Multi 1 / 254nm,4nm

PeakTable

| PDA Ch1 254nm |           |         |        |         |          |
|---------------|-----------|---------|--------|---------|----------|
| Peak#         | Ret. Time | Area    | Height | Area %  | Height % |
| 1             | 15.655    | 50783   | 2464   | 1.495   | 1.625    |
| 2             | 16.280    | 3006226 | 129365 | 88.486  | 85.317   |
| 3             | 19.078    | 229811  | 5340   | 6.764   | 3.522    |
| 4             | 22.846    | 110572  | 14459  | 3.255   | 9.536    |
| Total         |           | 3397391 | 151629 | 100.000 | 100.000  |

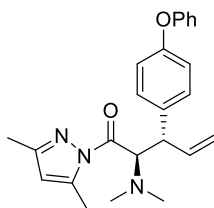

**(2R,3S)-1-(3,5-dimethyl-1H-pyrazol-1-yl)-2-(dimethylamino)-3-(4-phenoxyphenyl)pent-4-en-1-one (3h)**: Following the general procedure, the reaction was conducted at 0.2 mmol scale, product **3h** was obtained as a colorless liquid (55.0 mg, 71% yield, *anti:syn* = 6:1).

**TLC**:  $R_f = 0.6$  (petroleum ether/ethyl acetate 10/1).

$[\alpha]_D^{28} = +103.5$  ( $c = 0.42$ , in  $\text{CH}_2\text{Cl}_2$ ).

**$^1\text{H NMR}$**  (400 MHz,  $\text{CDCl}_3$ )  $\delta = 7.30 - 7.24$  (m, 3H), 7.21 – 7.17 (m, 2H), 7.08 – 7.02 (m, 1H), 6.86 – 6.78 (m, 4H), 6.25 – 6.17 (m, 1H), 5.82 (s, 1H), 5.32 (d,  $J = 11.7$  Hz, 1H), 5.20 – 5.12 (m, 2H), 3.92 – 3.87 (m, 1H), 2.46 (s, 6H), 2.34 (d,  $J = 0.8$  Hz, 3H), 2.16 (s, 3H).

**$^{13}\text{C NMR}$**  (101 MHz,  $\text{CDCl}_3$ )  $\delta = 171.5, 155.5, 151.4, 143.3, 139.5, 135.4, 129.9, 129.6, 122.9, 119.1, 118.4, 116.1, 111.2, 66.7, 49.4, 41.3, 14.5, 13.8$ .

**HPLC**: 93:7 *er*, chiral stationary column: AD-H, mobile phase: hexane/ $i$ PrOH = 99.5/0.5, flow rate 1.0 mL/min,  $\lambda = 254$  nm, 30 °C,  $t_r$  (major) = 7.2 min,  $t_r$  (minor) = 5.7 min.

**HRMS**  $m/z$   $[\text{M}+\text{H}]^+$  calcd for  $\text{C}_{24}\text{H}_{28}\text{N}_3\text{O}_2^+$  = 390.2176, found 390.2175.

### Racemic **3h**

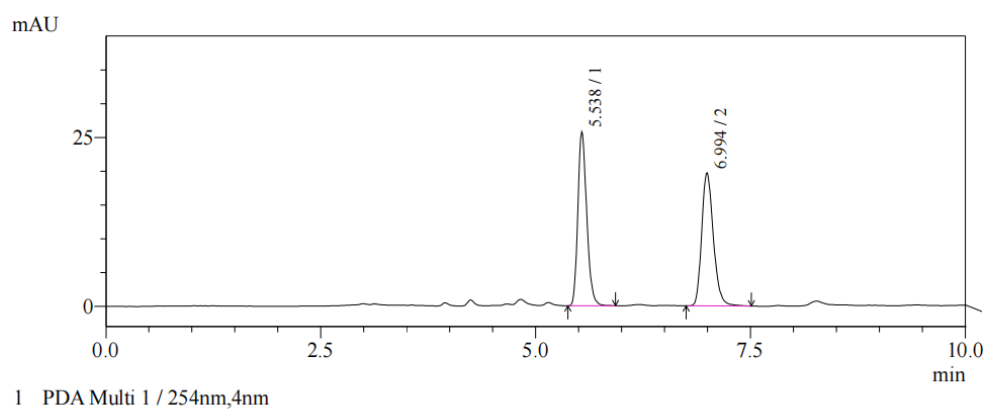

PeakTable

| Peak# | Ret. Time | Area   | Height | Area %  | Height % |
|-------|-----------|--------|--------|---------|----------|
| 1     | 5.538     | 185481 | 25766  | 49.908  | 56.640   |
| 2     | 6.994     | 186167 | 19725  | 50.092  | 43.360   |
| Total |           | 371648 | 45491  | 100.000 | 100.000  |

### Enantioenriched **3h**

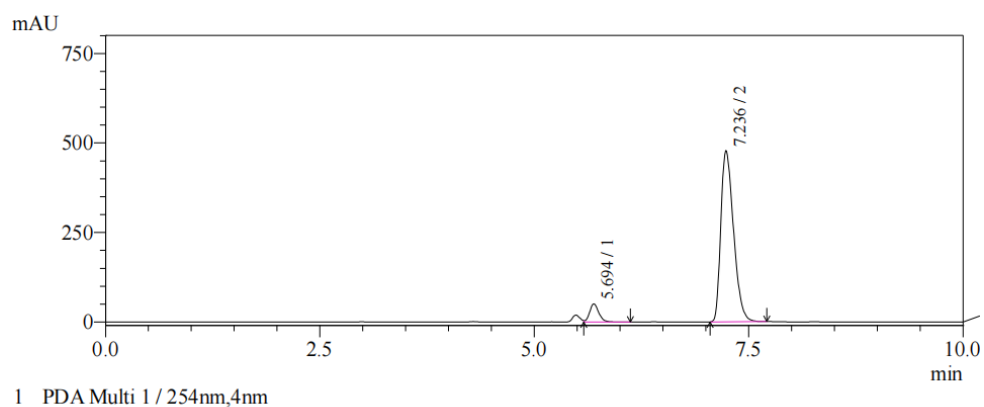

PeakTable

| Peak# | Ret. Time | Area    | Height | Area %  | Height % |
|-------|-----------|---------|--------|---------|----------|
| 1     | 5.694     | 373811  | 51009  | 7.046   | 9.637    |
| 2     | 7.236     | 4931170 | 478299 | 92.954  | 90.363   |
| Total |           | 5304981 | 529308 | 100.000 | 100.000  |



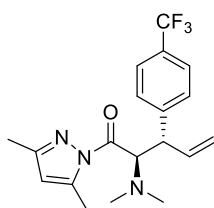

**(2*R*,3*S*)-1-(3,5-dimethyl-1*H*-pyrazol-1-yl)-2-(dimethylamino)-3-(4-(trifluoromethyl)phenyl)pent-4-en-1-one (3i)** Following the general procedure, the reaction was conducted at 0.2 mmol scale, product **3i** was obtained as a colorless liquid (38.0 mg, 52% yield, *anti:syn* = 2:1).

**TLC:**  $R_f$  = 0.6 (petroleum ether/ethyl acetate 10/1).

$[\alpha]_D^{28}$  = +57.5 ( $c$  = 0.69, in  $\text{CH}_2\text{Cl}_2$ ).

**$^1\text{H}$  NMR** (500 MHz,  $\text{CDCl}_3$ )  $\delta$  7.42 (d,  $J$  = 8.2 Hz, 2H), 7.35 (d,  $J$  = 8.2 Hz, 2H), 6.24-6.13 (m, 1H), 5.81 (s, 1H), 5.36 (d,  $J$  = 11.7 Hz, 1H), 5.17 (d,  $J$  = 10.2 Hz, 1H), 5.10 (d,  $J$  = 17.1 Hz, 1H), 3.98 (dd,  $J$  = 11.7, 8.3 Hz, 1H), 2.44 (s, 6H), 2.33 (s, 3H), 2.17 (s, 3H).

**$^{13}\text{C}$  NMR** (125 MHz,  $\text{CDCl}_3$ )  $\delta$  170.7, 151.7, 144.8, 143.5, 139.0, 129.0, 125.4, 125.3 (q,  $J_{\text{C-F}}$  = 3.9 Hz,  $J_{\text{C-F}}$  = 8.0 Hz), 123.2, 116.7, 111.5, 66.3, 49.6, 41.4, 14.4, 13.8.

**$^{19}\text{F}$  NMR** (376 MHz,  $\text{CDCl}_3$ )  $\delta$  -62.51.

**HPLC:** major isomer, 90:10 *er*, chiral stationary column: IA, mobile phase: hexane/*i*PrOH = 99/1, flow rate 0.5 mL/min,  $\lambda$  = 254 nm, 30 °C,  $t_r$  (major) = 9.2 min,  $t_r$  (minor) = 7.6 min.

minor isomer, 65:35 *er*, chiral stationary column: IA, mobile phase: hexane/*i*PrOH = 99.5/0.5, flow rate 0.5 mL/min,  $\lambda$  = 254 nm, 30 °C,  $t_r$  (major) = 10.1 min,  $t_r$  (minor) = 8.6 min.

**HRMS**  $m/z$   $[\text{M}+\text{H}]^+$  calcd for  $\text{C}_{19}\text{H}_{23}\text{F}_3\text{N}_3\text{O}^+$  = 366.1793, found 366.1790.

Racemic-major **3i**

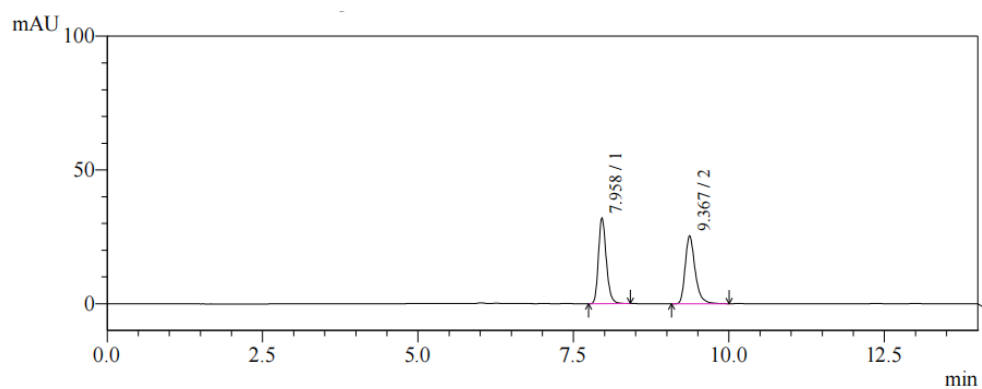

1 PDA Multi 1 / 254nm,4nm

PeakTable

| PDA Ch1 254nm |           |        |        |         |          |
|---------------|-----------|--------|--------|---------|----------|
| Peak#         | Ret. Time | Area   | Height | Area %  | Height % |
| 1             | 7.958     | 281450 | 32111  | 49.896  | 55.818   |
| 2             | 9.367     | 282621 | 25416  | 50.104  | 44.182   |
| Total         |           | 564071 | 57527  | 100.000 | 100.000  |

Enantioenriched-major **3i**

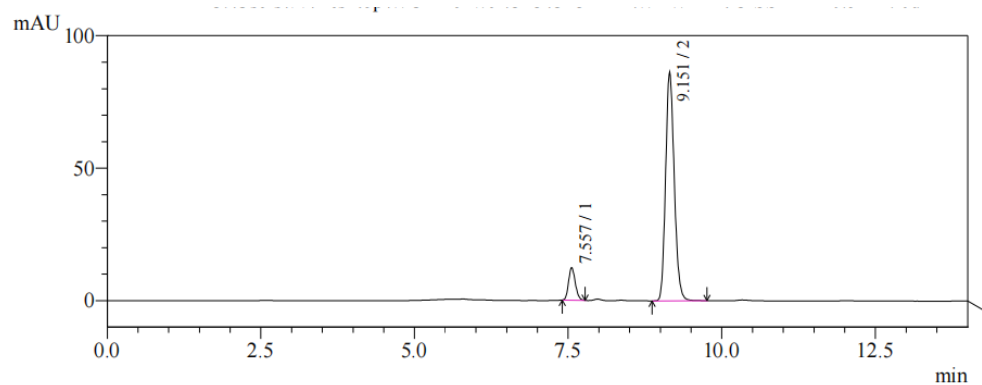

1 PDA Multi 1 / 254nm,4nm

PeakTable

| PDA Ch1 254nm |           |        |        |         |          |
|---------------|-----------|--------|--------|---------|----------|
| Peak#         | Ret. Time | Area   | Height | Area %  | Height % |
| 1             | 7.557     | 93462  | 12223  | 9.972   | 12.384   |
| 2             | 9.151     | 843785 | 86476  | 90.028  | 87.616   |
| Total         |           | 937247 | 98698  | 100.000 | 100.000  |

Racemic-minor **3i**

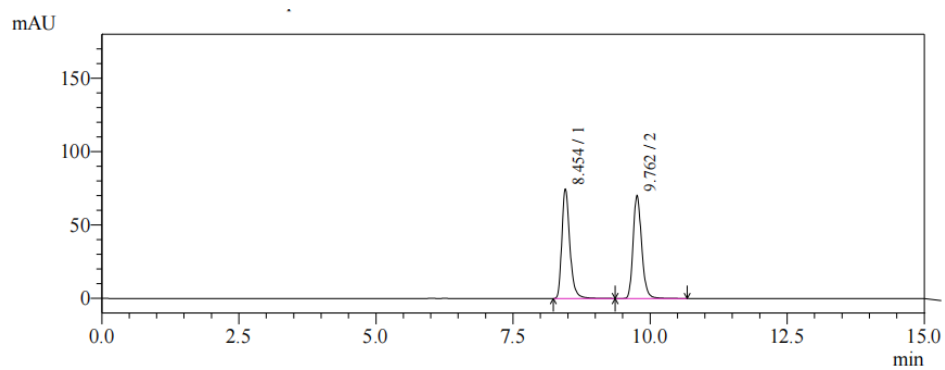

1 PDA Multi 1 / 254nm,4nm

PeakTable

| PDA Ch1 254nm |           |         |        |         |          |
|---------------|-----------|---------|--------|---------|----------|
| Peak#         | Ret. Time | Area    | Height | Area %  | Height % |
| 1             | 8.454     | 757561  | 74752  | 49.756  | 51.520   |
| 2             | 9.762     | 764988  | 70341  | 50.244  | 48.480   |
| Total         |           | 1522549 | 145092 | 100.000 | 100.000  |

Enantioenriched-minor **3i**

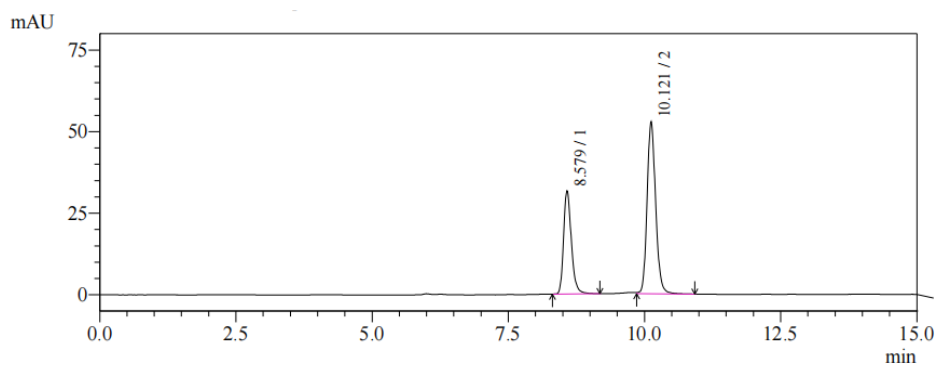

1 PDA Multi 1 / 254nm,4nm

PeakTable

| PDA Ch1 254nm |           |        |        |         |          |
|---------------|-----------|--------|--------|---------|----------|
| Peak#         | Ret. Time | Area   | Height | Area %  | Height % |
| 1             | 8.579     | 314524 | 31702  | 35.137  | 37.493   |
| 2             | 10.121    | 580614 | 52853  | 64.863  | 62.507   |
| Total         |           | 895137 | 84555  | 100.000 | 100.000  |

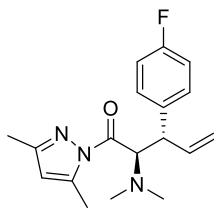

**(2R,3S)-1-(3,5-dimethyl-1H-pyrazol-1-yl)-2-(dimethylamino)-3-(4-fluorophenyl)pent-4-en-1-one (3j):** Following the general procedure, the reaction was conducted at 0.2 mmol scale, product **3j** was obtained as a colorless liquid (29.0 mg, 46% yield, *anti:syn* = 5:1).

**TLC:**  $R_f = 0.7$  (petroleum ether/ethyl acetate 10/1).

$[\alpha]_D^{28} = +46.4$  ( $c = 0.54$ , in  $\text{CH}_2\text{Cl}_2$ ).

**$^1\text{H NMR}$**  (400 MHz,  $\text{CDCl}_3$ )  $\delta = 7.23 - 7.16$  (m, 2H), 6.90 – 6.79 (m, 2H), 6.22 – 6.13 (m, 1H), 5.80 (s, 1H), 5.31 (d,  $J=11.8$  Hz, 1H), 5.19 – 5.05 (m, 2H), 2.43 (s, 6H), 2.33 (s, 3H), 2.17 (s, 3H).

**$^{13}\text{C NMR}$**  (101 MHz,  $\text{CDCl}_3$ )  $\delta = 170.9$ , 161.6 (d,  $J_{\text{C-F}} = 243.3$  Hz) 151.5, 143.4, 139.5, 136.1 (d,  $J_{\text{C-F}} = 3.2$  Hz), 130.1 (d,  $J_{\text{C-F}} = 7.9$  Hz), 116.1, 115.1 (d,  $J_{\text{C-F}} = 21.0$  Hz), 111.4, 66.5, 49.0, 41.3, 14.4, 13.8.

**$^{19}\text{F NMR}$  (376 MHz,  $\text{CDCl}_3$ )**  $\delta = -72.98$ .

**HPLC:** 92.5:7.5 *er*, chiral stationary column: IA, mobile phase: hexane/*i*PrOH = 99.5/0.5, flow rate 0.5 mL/min,  $\lambda = 254$  nm, 30 °C,  $t_r$  (major) = 9.1 min,  $t_r$  (minor) = 8.4 min.

**HRMS**  $m/z$   $[\text{M}+\text{H}]^+$  calcd for  $\text{C}_{18}\text{H}_{23}\text{FN}_3\text{O}^+$  = 316.1825, found 316.1822.

### Racemic **3j**

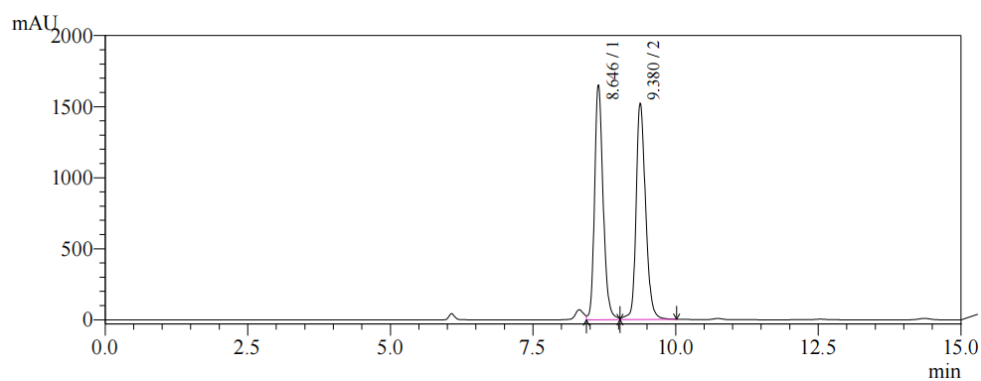

1 PDA Multi 1 / 254nm,4nm

PeakTable

| PDA Ch1 254nm |           |          |         |         |          |
|---------------|-----------|----------|---------|---------|----------|
| Peak#         | Ret. Time | Area     | Height  | Area %  | Height % |
| 1             | 8.646     | 17231323 | 1652374 | 49.417  | 52.037   |
| 2             | 9.380     | 17637861 | 1523032 | 50.583  | 47.963   |
| Total         |           | 34869184 | 3175406 | 100.000 | 100.000  |

### Enantioenriched **3j**

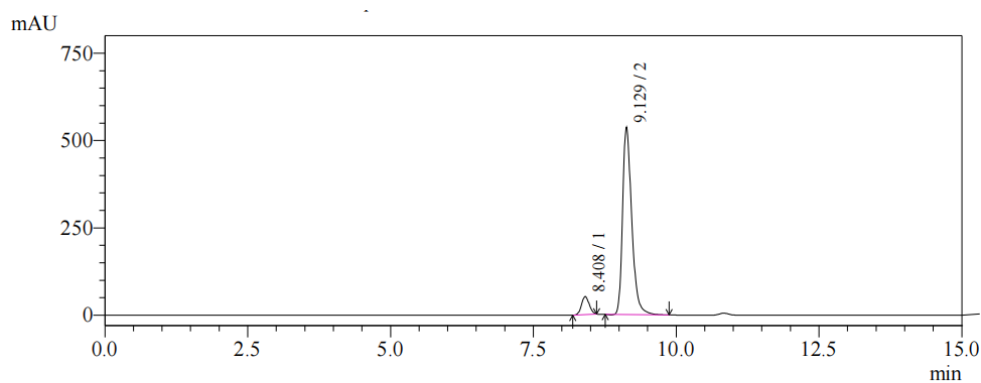

1 PDA Multi 1 / 254nm,4nm

PeakTable

| PDA Ch1 254nm |           |         |        |         |          |
|---------------|-----------|---------|--------|---------|----------|
| Peak#         | Ret. Time | Area    | Height | Area %  | Height % |
| 1             | 8.408     | 489580  | 51931  | 7.562   | 8.812    |
| 2             | 9.129     | 5984910 | 537378 | 92.438  | 91.188   |
| Total         |           | 6474489 | 589309 | 100.000 | 100.000  |

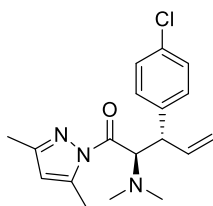

**(2R,3S)-3-(4-chlorophenyl)-1-(3,5-dimethyl-1H-pyrazol-1-yl)-2-(dimethylamino)pent-4-en-1-one (3k):** Following the general procedure, the reaction was conducted at 0.2 mmol scale, product **3k** was obtained as a colorless liquid (31.9 mg, 48% yield, *anti:syn* = 5:1).

**TLC:**  $R_f$  = 0.6 (petroleum ether/ethyl acetate 10/1).

$[\alpha]_D^{28} = +88.3$  ( $c = 0.24$ , in  $\text{CH}_2\text{Cl}_2$ ).

**$^1\text{H NMR}$**  (400 MHz,  $\text{CDCl}_3$ )  $\delta = 7.21 - 7.10$  (m, 4H), 6.23 – 6.09 (m, 1H), 5.82 (s, 1H), 5.31 (d,  $J = 11.8$  Hz, 1H), 5.19 – 5.04 (m, 2H), 3.94 – 3.84 (m, 1H), 2.42 (s, 6H), 2.35 (s, 3H), 2.18 (s, 3H).

**$^{13}\text{C NMR}$**  (101 MHz,  $\text{CDCl}_3$ )  $\delta = 170.6, 151.6, 143.4, 139.3, 139.1, 132.4, 129.9, 128.5, 116.3, 111.4, 66.3, 49.1, 41.3, 14.5, 13.9$ .

**HPLC:** 90:10 *er*, chiral stationary column: IA, mobile phase: hexane/ $i$ PrOH = 99.5/0.5, flow rate 1.0 mL/min,  $\lambda = 254$  nm, 30 °C,  $t_r$  (major) = 4.8 min,  $t_r$  (minor) = 4.3 min.

**HRMS**  $m/z$   $[\text{M}+\text{H}]^+$  calcd for  $\text{C}_{18}\text{H}_{23}\text{ClN}_3\text{O}^+ = 332.1530$ , found 332.1530.

### Racemic **3k**

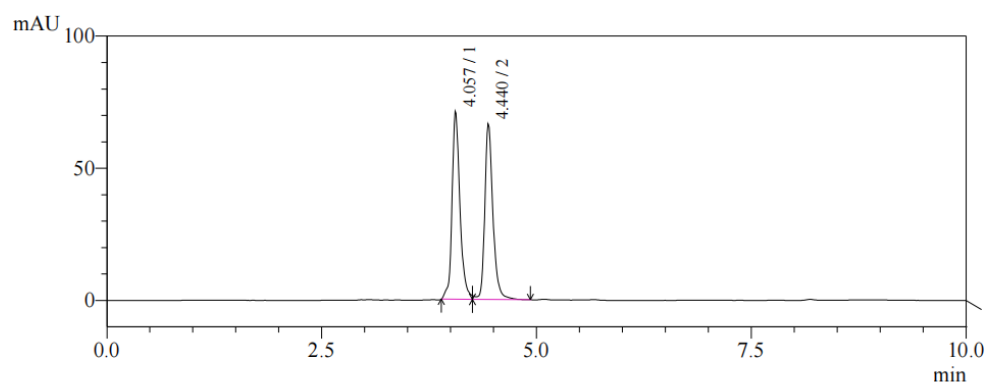

1 PDA Multi 1 / 254nm,4nm

PeakTable

| PDA Ch1 254nm |           |        |        |         |          |
|---------------|-----------|--------|--------|---------|----------|
| Peak#         | Ret. Time | Area   | Height | Area %  | Height % |
| 1             | 4.057     | 453036 | 71161  | 50.893  | 51.715   |
| 2             | 4.440     | 437136 | 66441  | 49.107  | 48.285   |
| Total         |           | 890173 | 137602 | 100.000 | 100.000  |

### Enantioenriched **3k**

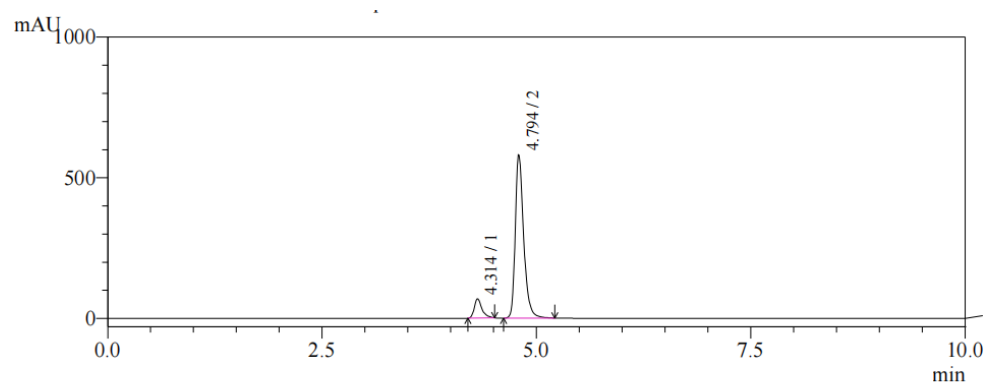

1 PDA Multi 1 / 254nm,4nm

PeakTable

| PDA Ch1 254nm |           |         |        |         |          |
|---------------|-----------|---------|--------|---------|----------|
| Peak#         | Ret. Time | Area    | Height | Area %  | Height % |
| 1             | 4.314     | 425555  | 68551  | 9.647   | 10.542   |
| 2             | 4.794     | 3985822 | 581701 | 90.353  | 89.458   |
| Total         |           | 4411378 | 650252 | 100.000 | 100.000  |

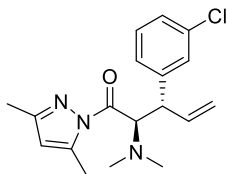

**(2R,3S)-3-(3-chlorophenyl)-1-(3,5-dimethyl-1H-pyrazol-1-yl)-2-(dimethylamino)pent-4-en-1-one (3I)** Following the general procedure, the reaction was conducted at 0.2 mmol scale, product **3I** was obtained as a colorless liquid (34.0 mg, 51% yield, *anti:syn* = 17:1).

**TLC:**  $R_f$  = 0.6 (petroleum ether/ethyl acetate 10/1).

$[\alpha]_D^{28}$  = +42.6 ( $c$  = 0.26, in  $\text{CH}_2\text{Cl}_2$ ).

**$^1\text{H NMR}$**  (400 MHz,  $\text{CDCl}_3$ )  $\delta$  7.28 – 7.26 (m, 1H), 7.12 – 7.01 (m, 3H), 6.21 – 6.22 (m, 1H), 5.80 (s, 1H), 5.33 (d,  $J$  = 11.7 Hz, 1H), 5.19 – 5.08 (m, 2H), 3.87 (dd,  $J$  = 11.7, 8.4 Hz, 1H), 2.44 (s, 6H), 2.33 (s, 3H), 2.18 (s, 3H).

**$^{13}\text{C NMR}$**  (125 MHz,  $\text{CDCl}_3$ )  $\delta$  171.1, 151.7, 143.4, 142.5, 139.1, 134.1, 129.5, 128.9, 126.9, 126.9, 116.6, 111.4, 66.3, 49.7, 41.3, 14.4, 13.8.

**HRMS**  $m/z$   $[\text{M}+\text{H}]^+$  calcd for  $\text{C}_{18}\text{H}_{23}\text{ClN}_3\text{O}^+$  = 332.1530, found 332.1527.

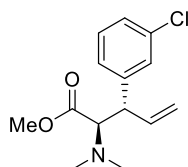

**methyl (2R,3S)-3-(3-chlorophenyl)-2-(dimethylamino)pent-4-enoate (3I-methyl ester)**

Following the general procedure, product **3I-methyl ester** was obtained as a colorless liquid, 24.1 mg, 48% yield in two steps,

**TLC:**  $R_f$  = 0.6 (petroleum ether/ethyl acetate 10/1).

$[\alpha]_D^{28}$  = +63.3 ( $c$  = 0.34, in  $\text{CH}_2\text{Cl}_2$ ).

**$^1\text{H NMR}$**  (400 MHz,  $\text{CDCl}_3$ )  $\delta$  7.23 – 7.14 (m, 3H), 7.08 (d,  $J$  = 7.0 Hz, 1H), 6.17 – 5.99 (m, 1H), 5.15 (d,  $J$  = 10.2 Hz, 1H), 5.09 (d,  $J$  = 17.1 Hz, 1H), 3.73 (dd,  $J$  = 11.6, 8.5 Hz, 1H), 3.53 (d,  $J$  = 11.7 Hz, 1H), 3.46 (s, 3H), 2.38 (s, 6H).

**$^{13}\text{C NMR}$**  (101 MHz,  $\text{CDCl}_3$ )  $\delta$  169.9, 142.9, 138.2, 134.3, 129.8, 128.5, 127.1, 126.5, 116.7, 71.5, 50.8, 49.4, 41.3.

**HPLC:** 92:8 *er*, chiral stationary column: AD-H, mobile phase: hexane/ $i$ PrOH = 99.8/0.2, flow rate 0.5 mL/min,  $\lambda$  = 254 nm, 30 °C,  $t_r$  (major) = 13.1 min,  $t_r$  (minor) = 12.4 min.

**HRMS**  $m/z$   $[\text{M}+\text{H}]^+$  calcd for  $\text{C}_{14}\text{H}_{19}\text{ClNO}_2^+$  = 268.1104, found 268.1100.



### Racemic **3l**-methyl ester

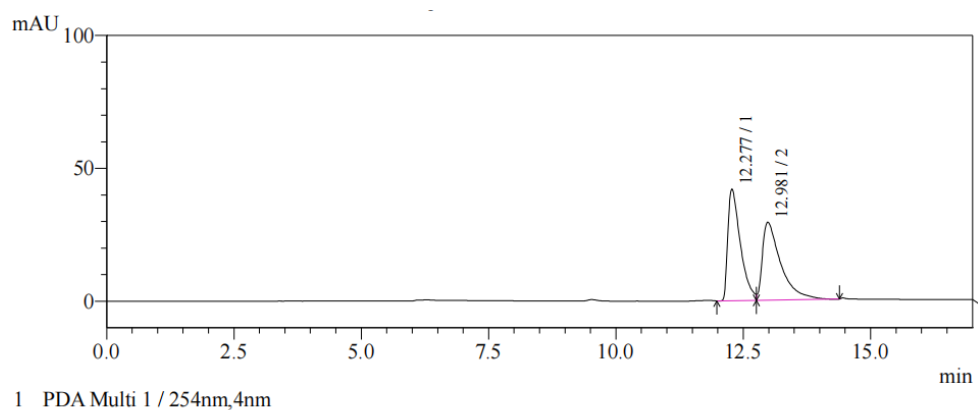

PeakTable

| PDA Ch1 254nm |           |         |        |         |          |
|---------------|-----------|---------|--------|---------|----------|
| Peak#         | Ret. Time | Area    | Height | Area %  | Height % |
| 1             | 12.277    | 718670  | 41997  | 49.511  | 58.859   |
| 2             | 12.981    | 732863  | 29355  | 50.489  | 41.141   |
| Total         |           | 1451533 | 71352  | 100.000 | 100.000  |

### Enantioenriched **3l**-methyl ester

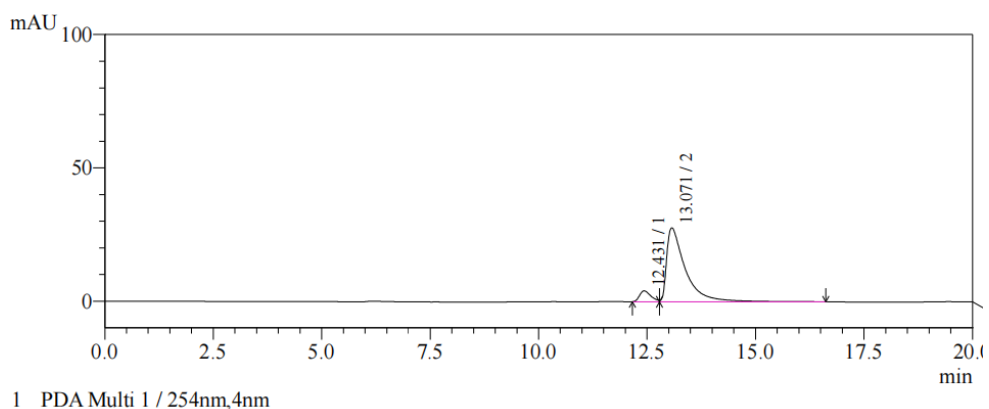

PeakTable

| PDA Ch1 254nm |           |        |        |         |          |
|---------------|-----------|--------|--------|---------|----------|
| Peak#         | Ret. Time | Area   | Height | Area %  | Height % |
| 1             | 12.431    | 73751  | 4076   | 8.148   | 12.808   |
| 2             | 13.071    | 831436 | 27749  | 91.852  | 87.192   |
| Total         |           | 905187 | 31825  | 100.000 | 100.000  |

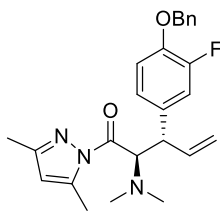

**(2R,3S)-3-(4-(benzyloxy)-3-fluorophenyl)-1-(3,5-dimethyl-1H-pyrazol-1-yl)-2-(dimethylamino)pent-4-en-1-one (3m):** Following the general procedure, the reaction was conducted at 0.2 mmol scale, product **3m** was obtained as a colorless liquid (36.2 mg, 43% yield, *anti:syn* = 9:1).

**TLC:**  $R_f = 0.6$  (petroleum ether/ethyl acetate 10/1).

$[\alpha]_D^{28} = +72.6$  ( $c = 0.62$ , in  $\text{CH}_2\text{Cl}_2$ ).

**$^1\text{H NMR}$**  (400 MHz,  $\text{CDCl}_3$ )  $\delta = 7.40 - 7.29$  (m, 5H), 7.03 – 7.00 (m, 1H), 6.89 – 6.87 (m, 1H), 6.80 – 6.76 (m, 1H), 6.18 – 6.09 (m, 1H), 5.79 (s, 1H), 5.28 (d,  $J = 11.7$  Hz, 1H), 5.16 – 5.08 (m, 2H), 5.02 (s, 2H), 3.86 – 3.81 (m, 1H), 2.42 (s, 6H), 2.33 (d,  $J = 0.8$  Hz, 3H), 2.17 (s, 3H).

**$^{13}\text{C NMR}$**  (101 MHz,  $\text{CDCl}_3$ )  $\delta = 171.0$ , 152.6 (d,  $J_{\text{C-F}} = 244.6$  Hz), 151.6, 145.3 (d,  $J_{\text{C-F}} = 10.8$  Hz), 143.4, 139.3, 136.7, 135.1 (d,  $J_{\text{C-F}} = 5.9$  Hz), 128.6, 128.1, 127.4, 124.2 (d,  $J_{\text{C-F}} = 3.5$  Hz), 116.4 (d,  $J_{\text{C-F}} = 18.9$  Hz), 116.1, 115.4 (d,  $J_{\text{C-F}} = 2.1$  Hz), 111.4, 71.4, 66.4, 48.9, 41.3, 14.4, 13.8.

**$^{19}\text{F NMR}$**  (376 MHz,  $\text{CDCl}_3$ )  $\delta = -133.76$ .

**HPLC:** 94.5:5.5 *er*, chiral stationary column: OD-H, mobile phase: hexane/ $i$ PrOH = 99.5/0.5, flow rate 1.0 mL/min,  $\lambda = 254$  nm, 30 °C, major isomer:  $t_r$  (major) = 10.5 min,  $t_r$  (minor) = 11.7 min.

**HRMS**  $m/z$   $[\text{M}+\text{H}]^+$  calcd for  $\text{C}_{25}\text{H}_{29}\text{FN}_3\text{O}_2^+$  = 422.2238, found 422.2237.

### Racemic **3m**

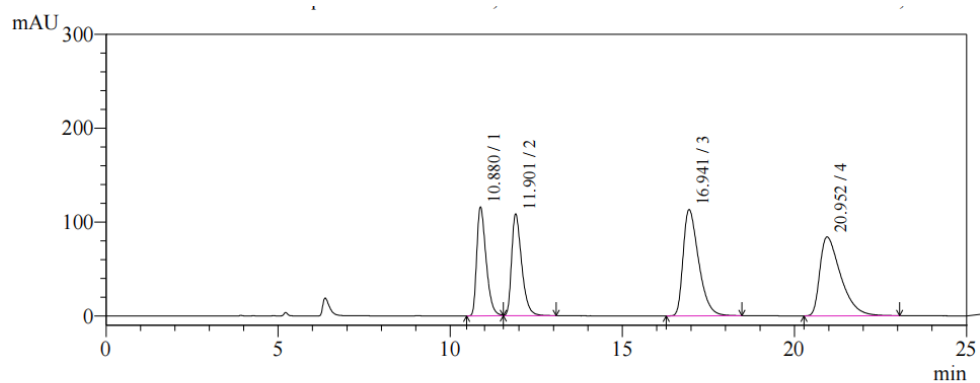

1 PDA Multi 1 / 254nm,4nm

PeakTable

| Peak# | Ret. Time | Area     | Height | Area %  | Height % |
|-------|-----------|----------|--------|---------|----------|
| 1     | 10.880    | 2196099  | 116314 | 19.105  | 27.517   |
| 2     | 11.901    | 2210197  | 108694 | 19.228  | 25.714   |
| 3     | 16.941    | 3545538  | 113510 | 30.845  | 26.854   |
| 4     | 20.952    | 3542945  | 84178  | 30.822  | 19.914   |
| Total |           | 11494779 | 422695 | 100.000 | 100.000  |

### Enantioenriched **3m**

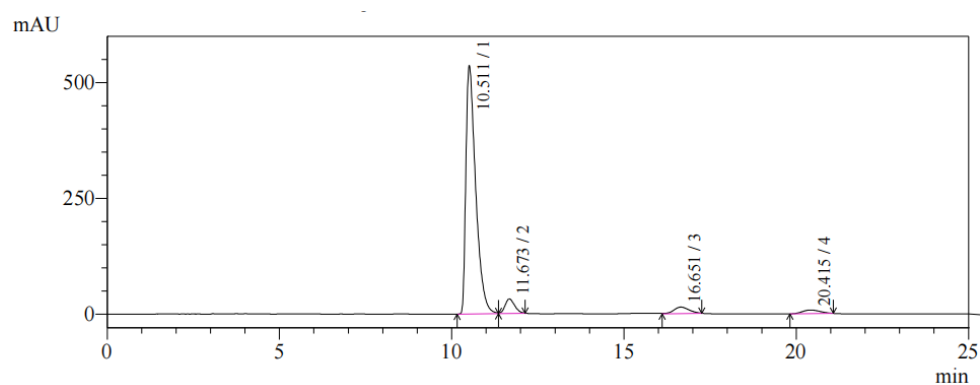

1 PDA Multi 1 / 254nm,4nm

PeakTable

| Peak# | Ret. Time | Area     | Height | Area %  | Height % |
|-------|-----------|----------|--------|---------|----------|
| 1     | 10.511    | 10586914 | 536678 | 88.936  | 90.969   |
| 2     | 11.673    | 600474   | 31272  | 5.044   | 5.301    |
| 3     | 16.651    | 434917   | 14130  | 3.654   | 2.395    |
| 4     | 20.415    | 281706   | 7876   | 2.366   | 1.335    |
| Total |           | 11904011 | 589956 | 100.000 | 100.000  |

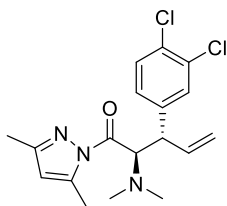

**(2R,3S)-3-(3,4-dichlorophenyl)-1-(3,5-dimethyl-1H-pyrazol-1-yl)-2-(dimethylamino)pent-4-en-1-one (3n)** Following the general procedure, the reaction was conducted at 0.2 mmol scale, product **3n** was obtained as a colorless liquid (47.4 mg, 65% yield, *anti:syn* = 8:1).

**TLC:**  $R_f$  = 0.6 (petroleum ether/ethyl acetate 10/1).

$[\alpha]_D^{28}$  = +54.8 ( $c$  = 0.70, in  $\text{CH}_2\text{Cl}_2$ ).

**$^1\text{H NMR}$**  (500 MHz,  $\text{CDCl}_3$ )  $\delta$  7.38 (d,  $J$  = 2.1 Hz, 1H), 7.22 (d,  $J$  = 8.3 Hz, 1H), 7.06 (dd,  $J$  = 8.3, 2.1 Hz, 1H), 6.19-6.08 (m, 1H), 5.83 (s, 1H), 5.30 (d,  $J$  = 11.7 Hz, 1H), 5.17 (dt,  $J$  = 10.1, 1.1 Hz, 1H), 5.10 (dt,  $J$  = 17.1, 1.3 Hz, 1H), 3.86 (dd,  $J$  = 11.7, 8.2 Hz, 1H), 2.42 (s, 6H), 2.36 (s, 3H), 2.18 (s, 3H).

**$^{13}\text{C NMR}$**  (125 MHz,  $\text{CDCl}_3$ )  $\delta$  170.8, 151.9, 143.5, 140.9, 138.7, 132.3, 130.8, 130.7, 130.2, 128.1, 116.8, 111.6, 66.3, 49.0, 41.3, 14.4, 13.8.

**HPLC:** 89:11 *er* chiral stationary column: AD-H, mobile phase: hexane/ $i$ PrOH = 100/0, flow rate 1.0 mL/min,  $\lambda$  = 254 nm, 30 °C,  $t_r$  (major) = 4.1 min,  $t_r$  (minor) = 3.9 min.

**HRMS**  $m/z$   $[\text{M}+\text{H}]^+$  calcd for  $\text{C}_{18}\text{H}_{22}\text{Cl}_2\text{N}_3\text{O}^+$  = 366.1140, found 366.1142.

### Racemic **3n**

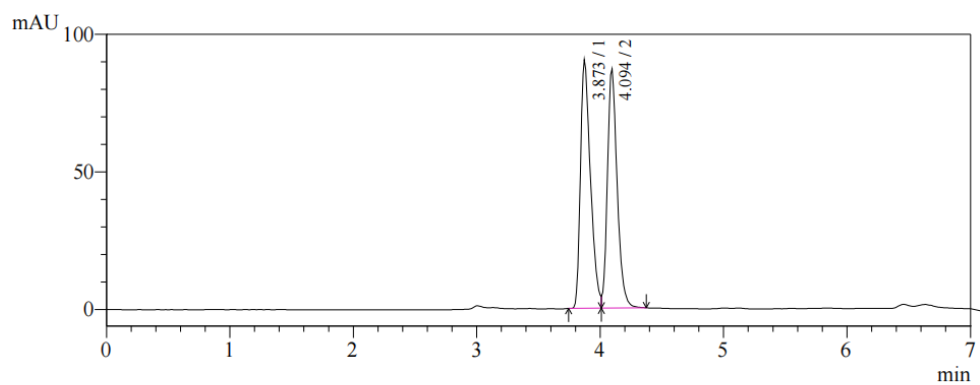

1 PDA Multi 1 / 254nm,4nm

PeakTable

PDA Ch1 254nm

| Peak# | Ret. Time | Area   | Height | Area %  | Height % |
|-------|-----------|--------|--------|---------|----------|
| 1     | 3.873     | 510068 | 90438  | 51.803  | 50.985   |
| 2     | 4.094     | 474561 | 86945  | 48.197  | 49.015   |
| Total |           | 984629 | 177384 | 100.000 | 100.000  |

### Enantioenriched **3n**

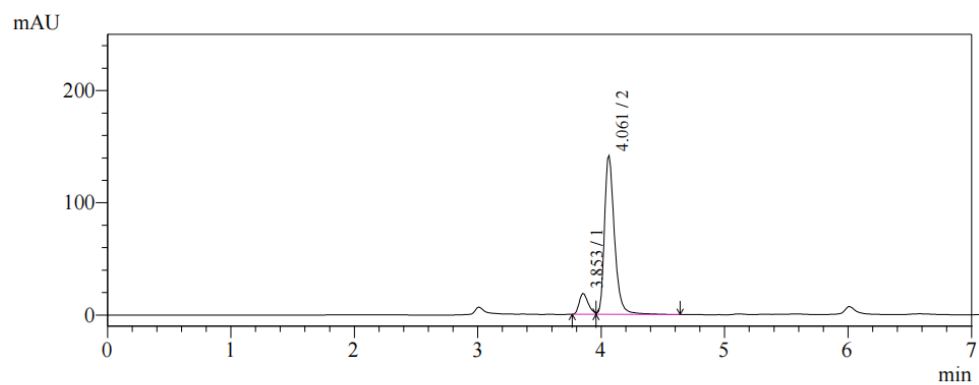

1 PDA Multi 1 / 254nm,4nm

PeakTable

PDA Ch1 254nm

| Peak# | Ret. Time | Area   | Height | Area %  | Height % |
|-------|-----------|--------|--------|---------|----------|
| 1     | 3.853     | 95764  | 18743  | 10.750  | 11.683   |
| 2     | 4.061     | 795043 | 141692 | 89.250  | 88.317   |
| Total |           | 890807 | 160436 | 100.000 | 100.000  |

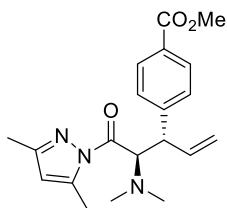

**Methyl 4-((3S,4R)-5-(3,5-dimethyl-1H-pyrazol-1-yl)-4-(dimethylamino)-5-oxopent-1-en-3-yl)benzoate (3o):** Following the general procedure, the reaction was conducted at 0.1 mmol scale, product **3o** was obtained as a colorless liquid (30.1 mg, 85% yield, *anti:syn* =4:1).

**TLC:**  $R_f = 0.6$  (petroleum ether/ethyl acetate 10/1).

$[\alpha]_D^{28} = +49.7$  ( $c = 0.48$ , in  $\text{CH}_2\text{Cl}_2$ ).

**$^1\text{H NMR}$**  (400 MHz,  $\text{CDCl}_3$ )  $\delta = 7.89 - 7.80$  (m, 2H), 7.35 – 7.29 (m, 2H), 6.23 – 6.14 (m, 1H), 5.79 (s, 1H), 5.38 (d,  $J = 11.7$  Hz, 1H), 5.20 – 5.05 (m, 2H), 4.01 – 3.96 (m, 1H), 3.85 (s, 3H), 2.43 (s, 6H), 2.31 (s, 3H), 2.17 (s, 3H).

**$^{13}\text{C NMR}$**  (101 MHz,  $\text{CDCl}_3$ )  $\delta = 170.5, 167.1, 151.6, 146.0, 143.4, 139.0, 137.9, 129.9, 129.7, 128.6, 128.5, 128.4, 117.3, 116.6, 111.7, 111.5, 66.1, 65.7, 52.1, 50.2, 49.7, 41.3, 41.2, 14.7, 14.4, 14.0, 13.8$ .

**HPLC:** 92.5:7.5 *er*, chiral stationary column: OD-H, mobile phase: hexane/*i*PrOH = 99.5/0.5, flow rate 1.0 mL/min,  $\lambda = 254$  nm, 30 °C, major isomer:  $t_r$  (major) = 7.3 min,  $t_r$  (minor) = 15.3 min.

**HRMS**  $m/z$   $[\text{M}+\text{H}]^+$  calcd for  $\text{C}_{20}\text{H}_{26}\text{N}_3\text{O}_3^+$  = 356.1969, found 356.1967.

### Racemic **3o**

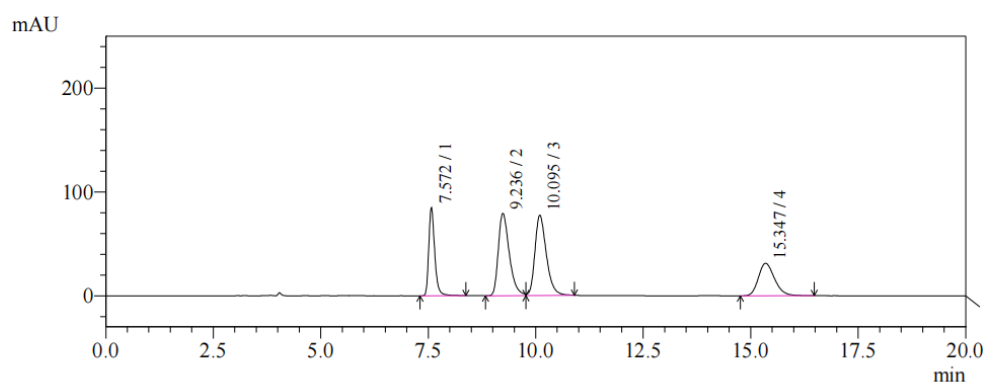

1 PDA Multi 1 / 254nm,4nm

PeakTable

| PDA Ch1 254nm |           |         |        |         |          |
|---------------|-----------|---------|--------|---------|----------|
| Peak#         | Ret. Time | Area    | Height | Area %  | Height % |
| 1             | 7.572     | 819197  | 84937  | 18.305  | 31.099   |
| 2             | 9.236     | 1408407 | 79405  | 31.471  | 29.074   |
| 3             | 10.095    | 1426418 | 77406  | 31.874  | 28.342   |
| 4             | 15.347    | 821205  | 31365  | 18.350  | 11.484   |
| Total         |           | 4475228 | 273113 | 100.000 | 100.000  |

### Enantioenriched **3o**

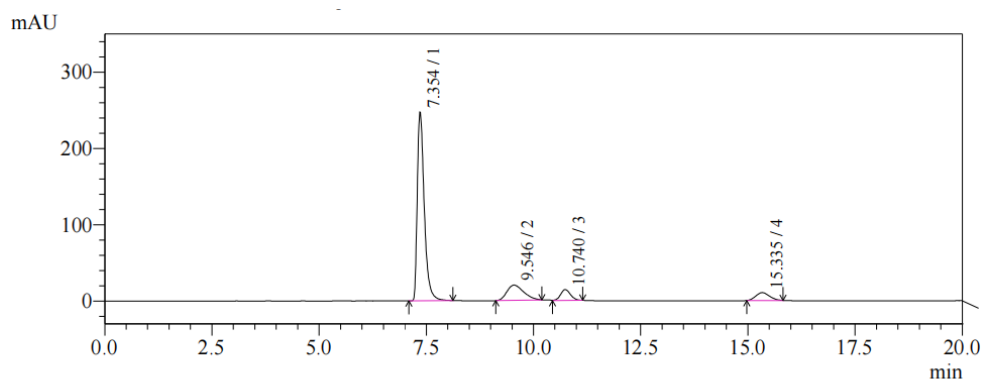

1 PDA Multi 1 / 254nm,4nm

PeakTable

| PDA Ch1 254nm |           |         |        |         |          |
|---------------|-----------|---------|--------|---------|----------|
| Peak#         | Ret. Time | Area    | Height | Area %  | Height % |
| 1             | 7.354     | 2805185 | 247351 | 73.702  | 84.727   |
| 2             | 9.546     | 544126  | 20004  | 14.296  | 6.852    |
| 3             | 10.740    | 228203  | 14294  | 5.996   | 4.896    |
| 4             | 15.335    | 228583  | 10289  | 6.006   | 3.525    |
| Total         |           | 3806097 | 291938 | 100.000 | 100.000  |

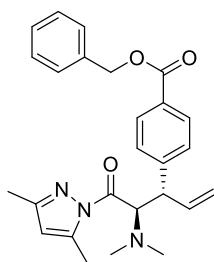

### Benzyl

**4-((3S,4R)-5-(3,5-dimethyl-1H-pyrazol-1-yl)-4-(dimethylamino)-5-oxopent-1-en-3-yl)benzoate (3p)** Following the general procedure, the reaction was conducted at 0.2 mmol scale, product **3p** was obtained as a colorless liquid (39.0 mg, 45% yield, *anti:syn* = 3:1).

**TLC:**  $R_f$  = 0.6 (petroleum ether/ethyl acetate 10/1).

**$[\alpha]_D^{28}$**  = +64.4 ( $c$  = 0.54, in  $\text{CH}_2\text{Cl}_2$ ).

**$^1\text{H NMR}$**  (400 MHz,  $\text{CDCl}_3$ )  $\delta$  7.88 (d,  $J$  = 8.4 Hz, 2H), 7.42 – 7.30 (m, 7H), 6.24 – 6.12 (m, 1H), 5.80 (s, 1H), 5.38 (d,  $J$  = 11.8 Hz, 1H), 5.30 (s, 2H), 5.19 – 5.07 (m, 2H), 3.99 (dd,  $J$  = 11.7, 8.4 Hz, 1H), 2.42 (s, 6H), 2.32 (s, 3H), 2.24 (s, 1H), 2.17 (s, 3H).

**$^{13}\text{C NMR}$**  (101 MHz,  $\text{CDCl}_3$ )  $\delta$  171.1, 170.4, 166.4, 166.3, 151.7, 151.6, 147.1, 146.1, 143.7, 143.4, 140.0, 137.9, 136.3, 136.1, 130.0, 129.8, 128.61, 128.57, 128.5, 128.43, 128.36, 128.21, 128.17, 128.15, 128.12, 117.2, 116.5, 111.6, 111.4, 66.6, 66.5, 66.1, 65.7, 50.1, 49.6, 41.3, 41.2, 14.6, 14.4, 13.9, 13.8.

**HPLC:** 90:10 *er*, chiral stationary column: OD-H, mobile phase: hexane/ $i$ PrOH = 99/1, flow rate 0.5 mL/min,  $\lambda$  = 254 nm, 30 °C, major isomer:  $t_r$  (major) = 16.4 min,  $t_r$  (minor) = 27.8 min.

**HRMS**  $m/z$   $[\text{M}+\text{H}]^+$  calcd for  $\text{C}_{26}\text{H}_{30}\text{N}_3\text{O}_3^+$  = 432.2282, found 432.2283.



### Racemic **3p**

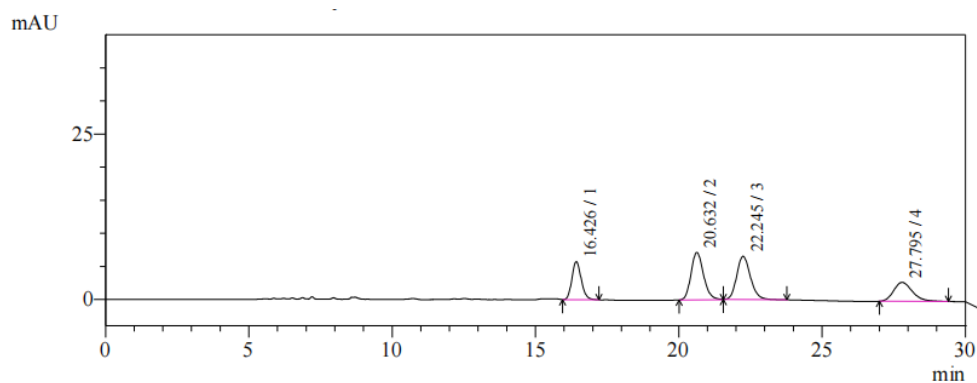

1 PDA Multi 1 / 254nm,4nm

PeakTable

PDA Ch1 254nm

| Peak# | Ret. Time | Area   | Height | Area %  | Height % |
|-------|-----------|--------|--------|---------|----------|
| 1     | 16.426    | 130694 | 5755   | 18.713  | 25.718   |
| 2     | 20.632    | 218973 | 7205   | 31.352  | 32.195   |
| 3     | 22.245    | 217422 | 6547   | 31.130  | 29.257   |
| 4     | 27.795    | 131337 | 2871   | 18.805  | 12.830   |
| Total |           | 698425 | 22378  | 100.000 | 100.000  |

### Enantioenriched **3p**

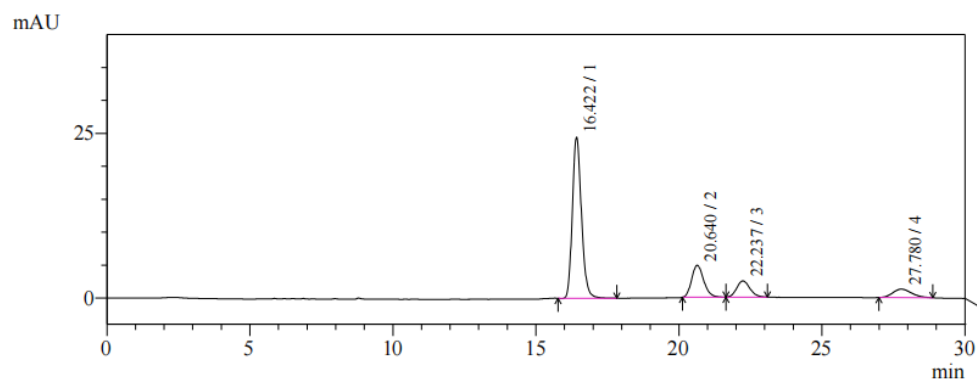

1 PDA Multi 1 / 254nm,4nm

PeakTable

PDA Ch1 254nm

| Peak# | Ret. Time | Area   | Height | Area %  | Height % |
|-------|-----------|--------|--------|---------|----------|
| 1     | 16.422    | 541260 | 24479  | 65.939  | 73.960   |
| 2     | 20.640    | 141783 | 4868   | 17.273  | 14.707   |
| 3     | 22.237    | 78750  | 2463   | 9.594   | 7.442    |
| 4     | 27.780    | 59053  | 1288   | 7.194   | 3.891    |
| Total |           | 820847 | 33097  | 100.000 | 100.000  |

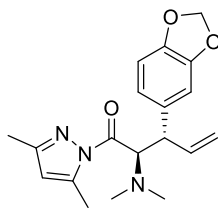

**(2R,3S)-3-(benzo[d][1,3]dioxol-5-yl)-1-(3,5-dimethyl-1H-pyrazol-1-yl)-2-(dimethylamino)pent-4-en-1-one (3q):** Following the general procedure, the reaction was conducted at 0.2 mmol scale, product **3q** was obtained as a white solid (55.0 mg, 81% yield, *anti:syn* = 10:1), M.p. 30 – 31 °C.

**TLC:**  $R_f = 0.6$  (petroleum ether/ethyl acetate 10/1).

$[\alpha]_D^{28} = +65.0$  ( $c = 0.90$ , in  $\text{CH}_2\text{Cl}_2$ ).

**$^1\text{H NMR}$**  (400 MHz,  $\text{CDCl}_3$ )  $\delta = 6.77 - 6.74$  (m, 1H), 6.70 – 6.68 (m, 1H), 6.61 – 6.59 (m, 1H), 6.19 – 6.10 (m, 1H), 5.85 – 5.80 (m, 3H), 5.28 (d,  $J = 11.7$  Hz, 1H), 5.16 – 5.07 (m, 2H), 3.85 – 3.80 (m, 1H), 2.41 (s, 6H), 2.36 (s, 3H), 2.18 (s, 3H).

**$^{13}\text{C NMR}$**  (101 MHz,  $\text{CDCl}_3$ )  $\delta = 170.9, 151.4, 147.5, 146.1, 143.4, 139.8, 134.3, 121.6, 115.8, 111.3, 109.0, 108.1, 100.8, 66.4, 49.4, 41.3, 14.5, 13.8$ .

**HPLC:** 94:6 *er*, chiral stationary column: OD-H, mobile phase: hexane/ $i$ PrOH = 99.5/0.5, flow rate 1.0 mL/min,  $\lambda = 254$  nm, 30 °C,  $t_r$  (major) = 6.3 min,  $t_r$  (minor) = 11.1 min.

**HRMS**  $m/z$   $[\text{M}+\text{H}]^+$  calcd for  $\text{C}_{19}\text{H}_{24}\text{N}_3\text{O}_3^+$  = 342.1812, found 342.1811.

### Racemic **3q**

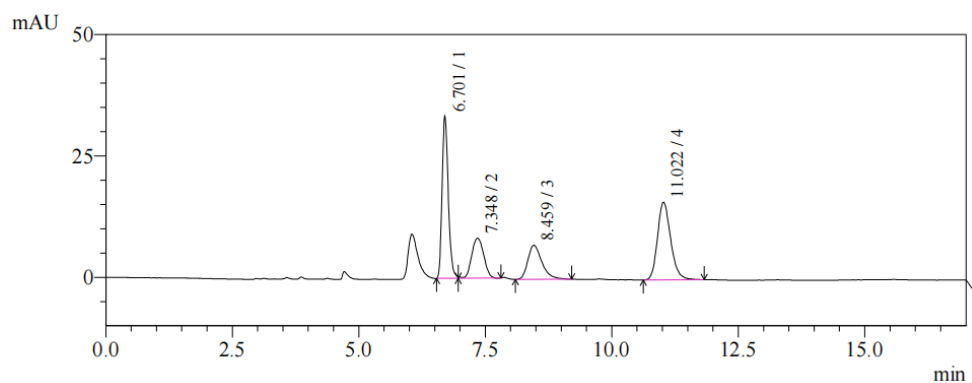

1 PDA Multi 1 / 254nm,4nm

PeakTable

| PDA Ch1 254nm |           |        |        |         |          |
|---------------|-----------|--------|--------|---------|----------|
| Peak#         | Ret. Time | Area   | Height | Area %  | Height % |
| 1             | 6.701     | 283649 | 33441  | 33.583  | 51.660   |
| 2             | 7.348     | 135101 | 8225   | 15.995  | 12.705   |
| 3             | 8.459     | 136260 | 7059   | 16.132  | 10.905   |
| 4             | 11.022    | 289622 | 16009  | 34.290  | 24.730   |
| Total         |           | 844631 | 64733  | 100.000 | 100.000  |

### Enantioenriched **3q**

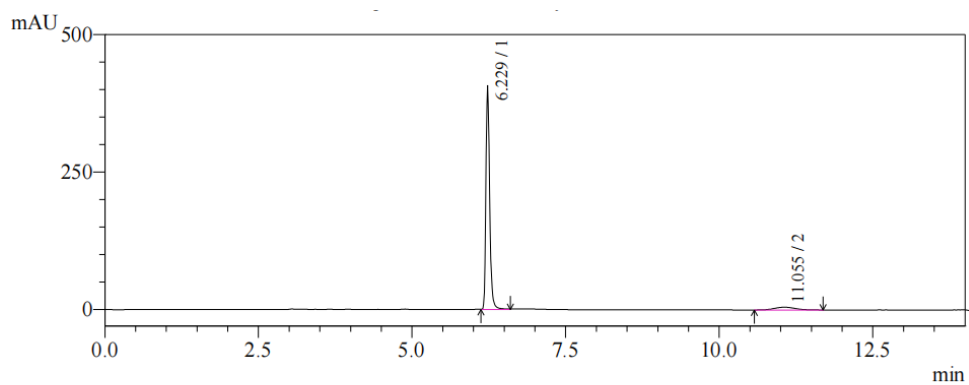

1 PDA Multi 1 / 254nm,4nm

PeakTable

| PDA Ch1 254nm |           |         |        |         |          |
|---------------|-----------|---------|--------|---------|----------|
| Peak#         | Ret. Time | Area    | Height | Area %  | Height % |
| 1             | 6.229     | 1728381 | 408275 | 93.636  | 98.789   |
| 2             | 11.055    | 117464  | 5003   | 6.364   | 1.211    |
| Total         |           | 1845846 | 413278 | 100.000 | 100.000  |

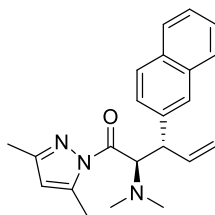

**(2R,3S)-1-(3,5-dimethyl-1H-pyrazol-1-yl)-2-(dimethylamino)-3-(naphthalen-2-yl)pent-4-en-1-one (3r):** Following the general procedure, the reaction was conducted at 0.2 mmol scale, product **3r** was obtained as a colorless liquid (45.0 mg, 65% yield, *anti:syn* = 10:1).

**TLC:**  $R_f$  = 0.6 (petroleum ether/ethyl acetate 10/1).

$[\alpha]_D^{28}$  = +110.2 ( $c$  = 0.12, in  $\text{CH}_2\text{Cl}_2$ ).

**$^1\text{H NMR}$**  (400 MHz,  $\text{CDCl}_3$ )  $\delta$  = 7.75 – 7.63 (m, 4H), 7.41 – 7.33 (m, 3H), 6.34 – 6.21 (m, 1H), 5.69 (s, 1H), 5.51 (d,  $J$  = 11.7 Hz, 1H), 5.17 – 5.13 (m, 2H), 4.12 – 4.07 (m, 1H), 2.48 (s, 6H), 2.24 (s, 3H), 2.16 (s, 3H).

**$^{13}\text{C NMR}$**  (101 MHz,  $\text{CDCl}_3$ )  $\delta$  = 170.9, 151.4, 143.4, 139.7, 138.0, 133.5, 132.4, 127.9, 127.8, 127.5, 127.10, 127.08, 125.8, 125.4, 116.2, 111.3, 66.2, 49.9, 41.4, 14.4, 13.8.

**HPLC:** 95:5 *er*, chiral stationary column: IA, mobile phase: hexane/ $i$ PrOH = 99.8/0.2, flow rate 0.5 mL/min,  $\lambda$  = 254 nm, 30 °C,  $t_r$  (major) = 13.7 min,  $t_r$  (minor) = 12.7 min.

**HRMS**  $m/z$   $[\text{M}+\text{H}]^+$  calcd for  $\text{C}_{22}\text{H}_{26}\text{N}_3\text{O}^+$  = 348.2076, found 348.2077.

### Racemic **3r**

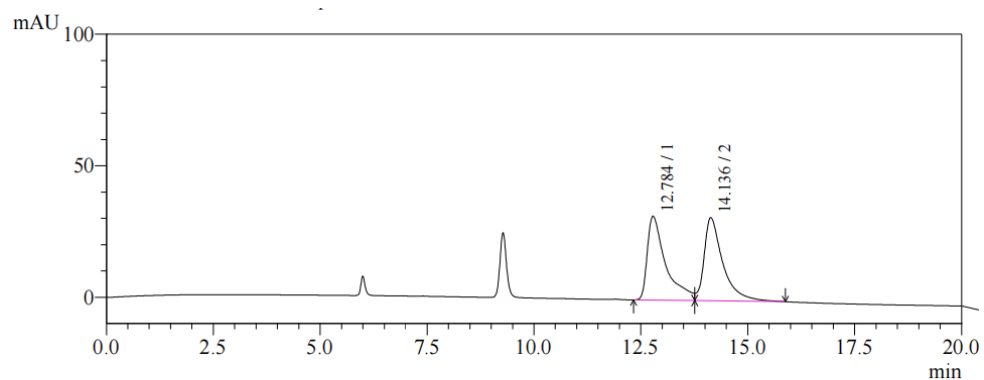

1 PDA Multi 1 / 254nm,4nm

PeakTable

| PDA Ch1 254nm |           |         |        |         |          |
|---------------|-----------|---------|--------|---------|----------|
| Peak#         | Ret. Time | Area    | Height | Area %  | Height % |
| 1             | 12.784    | 954532  | 31925  | 49.711  | 50.211   |
| 2             | 14.136    | 965640  | 31657  | 50.289  | 49.789   |
| Total         |           | 1920172 | 63582  | 100.000 | 100.000  |

### Enantioenriched **3r**

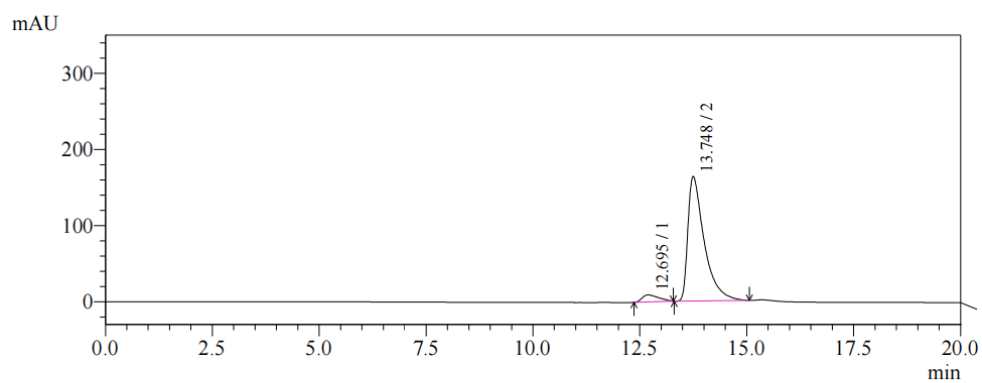

1 PDA Multi 1 / 254nm,4nm

PeakTable

| PDA Ch1 254nm |           |         |        |         |          |
|---------------|-----------|---------|--------|---------|----------|
| Peak#         | Ret. Time | Area    | Height | Area %  | Height % |
| 1             | 12.695    | 242558  | 9208   | 5.275   | 5.321    |
| 2             | 13.748    | 4356002 | 163842 | 94.725  | 94.679   |
| Total         |           | 4598560 | 173050 | 100.000 | 100.000  |

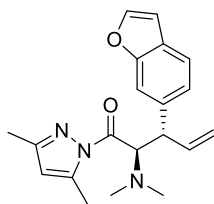

**(2R,3S)-3-(benzofuran-6-yl)-1-(3,5-dimethyl-1H-pyrazol-1-yl)-2-(dimethylamino)pent-4-en-1-one (3s)** Following the general procedure, the reaction was conducted at 0.2 mmol scale, product **3s** was obtained as a colorless liquid (25.6 mg, 38% yield, *anti:syn* =10:1).

**TLC:**  $R_f$  = 0.6 (petroleum ether/ethyl acetate 10/1).

$[\alpha]_D^{28}$  = +63.5 ( $c$  = 0.26, in  $\text{CH}_2\text{Cl}_2$ ).

**$^1\text{H}$  NMR** (400 MHz,  $\text{CDCl}_3$ )  $\delta$  7.51 (d,  $J$  = 2.2 Hz, 1H), 7.48 (d,  $J$  = 1.7 Hz, 1H), 7.28 (d,  $J$  = 8.5 Hz, 1H), 7.18 (dd,  $J$  = 8.5, 1.8 Hz, 1H), 6.63 (dd,  $J$  = 2.1, 0.8 Hz, 1H), 6.31-6.19 (m, 1H), 5.72 (s, 1H), 5.40 (d,  $J$  = 11.7 Hz, 1H), 5.18 – 5.10 (m, 2H), 4.01 (dd,  $J$  = 11.7, 8.6 Hz, 1H), 2.46 (s, 6H), 2.27 (s, 3H), 2.15 (s, 3H).

**$^{13}\text{C}$  NMR** (101 MHz,  $\text{CDCl}_3$ )  $\delta$  171.8, 171.1, 154.0, 153.9, 151.6, 151.3, 145.1, 145.0, 143.7, 143.3, 140.1, 139.2, 135.8, 135.0, 127.8, 127.4, 124.9, 124.5, 121.1, 120.6, 116.3, 115.8, 111.6, 111.5, 111.2, 111.0, 106.7, 106.6, 66.7, 66.1, 50.1, 49.7, 41.33, 41.28, 14.7, 14.4, 14.0, 13.8.

**HPLC:** 93.5:6.5 *er*, chiral stationary column: AD-H, mobile phase: hexane/ $^i$ PrOH = 99/1, flow rate 0.5 mL/min,  $\lambda$  = 254 nm, 30 °C, major isomer:  $t_r$  (major) = 10.7 min,  $t_r$  (minor) = 9.8 min.

**HRMS**  $m/z$   $[\text{M}+\text{H}]^+$  calcd for  $\text{C}_{20}\text{H}_{24}\text{N}_3\text{O}_2^+$  = 338.1863, found 338.1863.

Racemic **3s**

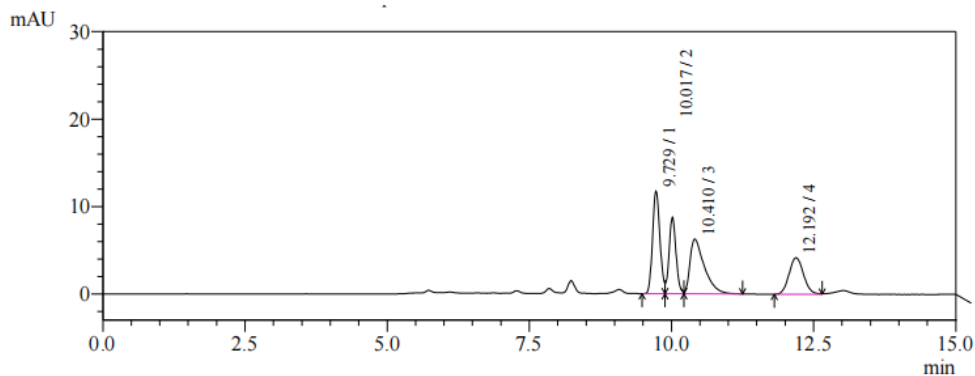

1 PDA Multi 1 / 254nm,4nm

PeakTable

| Peak# | Ret. Time | Area   | Height | Area %  | Height % |
|-------|-----------|--------|--------|---------|----------|
| 1     | 9.729     | 105995 | 11727  | 29.056  | 37.896   |
| 2     | 10.017    | 74316  | 8753   | 20.372  | 28.288   |
| 3     | 10.410    | 110761 | 6288   | 30.362  | 20.319   |
| 4     | 12.192    | 73724  | 4177   | 20.210  | 13.497   |
| Total |           | 364797 | 30944  | 100.000 | 100.000  |

Enantioenriched **3s**

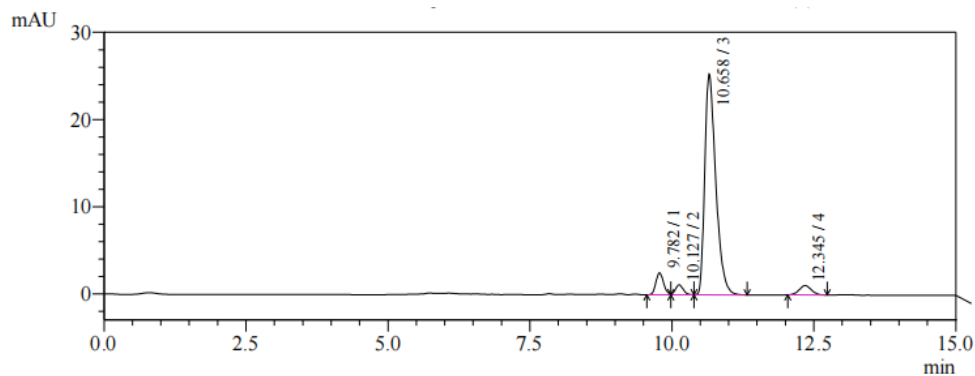

1 PDA Multi 1 / 254nm,4nm

PeakTable

| Peak# | Ret. Time | Area   | Height | Area %  | Height % |
|-------|-----------|--------|--------|---------|----------|
| 1     | 9.782     | 24007  | 2539   | 6.095   | 8.441    |
| 2     | 10.127    | 11073  | 1146   | 2.811   | 3.810    |
| 3     | 10.658    | 342836 | 25323  | 87.046  | 84.203   |
| 4     | 12.345    | 15942  | 1066   | 4.048   | 3.546    |
| Total |           | 393857 | 30074  | 100.000 | 100.000  |

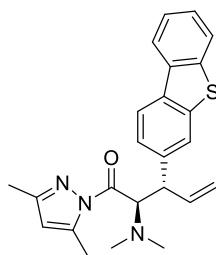

**(2R,3S)-3-(dibenzo[*b,d*]thiophen-3-yl)-1-(3,5-dimethyl-1H-pyrazol-1-yl)-2-(dimethylamino)pent-4-en-1-one (3t)** Following the general procedure, the reaction was conducted at 0.2 mmol scale, product **3t** was obtained as a colorless liquid (24.4 mg, 30% yield, *anti:syn* = 19:1).

**TLC:**  $R_f$  = 0.6 (petroleum ether/ethyl acetate 10/1).

$[\alpha]_D^{28}$  = +91.0 ( $c$  = 0.27, in  $\text{CH}_2\text{Cl}_2$ ).

**$^1\text{H NMR}$**  (400 MHz,  $\text{CDCl}_3$ )  $\delta$  8.07 – 8.01 (m, 1H), 7.94 (d,  $J$  = 8.2 Hz, 1H), 7.81 – 7.75 (m, 2H), 7.43 – 7.36 (m, 2H), 7.34 (dd,  $J$  = 8.2, 1.5 Hz, 1H), 6.36 – 6.22 (m, 1H), 5.70 (s, 1H), 5.47 (d,  $J$  = 11.7 Hz, 1H), 5.20 (s, 1H), 5.16 (d,  $J$  = 7.4 Hz, 1H), 4.07 (dd,  $J$  = 11.7, 8.5 Hz, 1H), 2.48 (s, 6H), 2.27 (s, 3H), 2.17 (s, 3H).

**$^{13}\text{C NMR}$**  (101 MHz,  $\text{CDCl}_3$ )  $\delta$  170.9, 151.6, 143.4, 139.6, 139.5, 139.3, 135.4, 134.2, 126.5, 125.2, 124.3, 122.8, 122.7, 121.43, 121.37, 116.3, 111.4, 66.5, 50.0, 41.4, 14.4, 13.8.

**HPLC:** 95:5 *er*, chiral stationary column: IA, mobile phase: hexane/ $i$ PrOH = 99/1, flow rate 0.5 mL/min,  $\lambda$  = 254 nm, 30 °C,  $t_r$  (major) = 11.8 min,  $t_r$  (minor) = 10.3 min.

**HRMS**  $m/z$   $[\text{M}+\text{H}]^+$  calcd for  $\text{C}_{24}\text{H}_{26}\text{N}_3\text{OS}^+$  = 404.1791, found 404.1793.



### Racemic **3t**

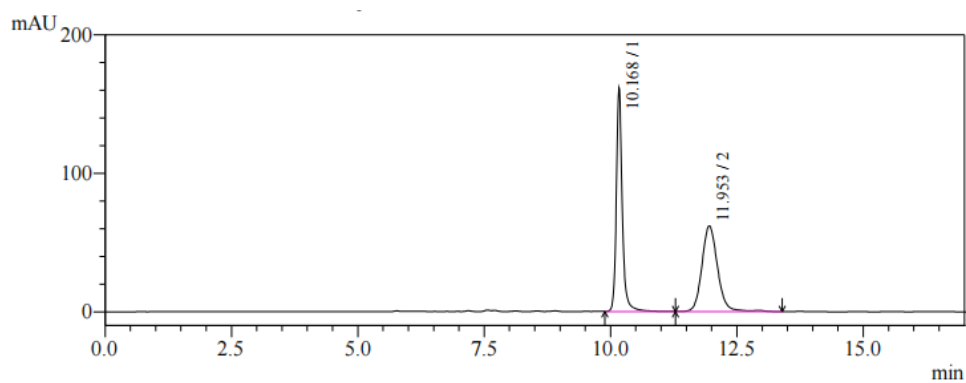

1 PDA Multi 1 / 254nm,4nm

PeakTable

| PDA Ch1 254nm |           |         |        |         |          |
|---------------|-----------|---------|--------|---------|----------|
| Peak#         | Ret. Time | Area    | Height | Area %  | Height % |
| 1             | 10.168    | 1324564 | 161761 | 49.691  | 72.307   |
| 2             | 11.953    | 1341013 | 61955  | 50.309  | 27.693   |
| Total         |           | 2665577 | 223716 | 100.000 | 100.000  |

### Enantioenriched **3t**

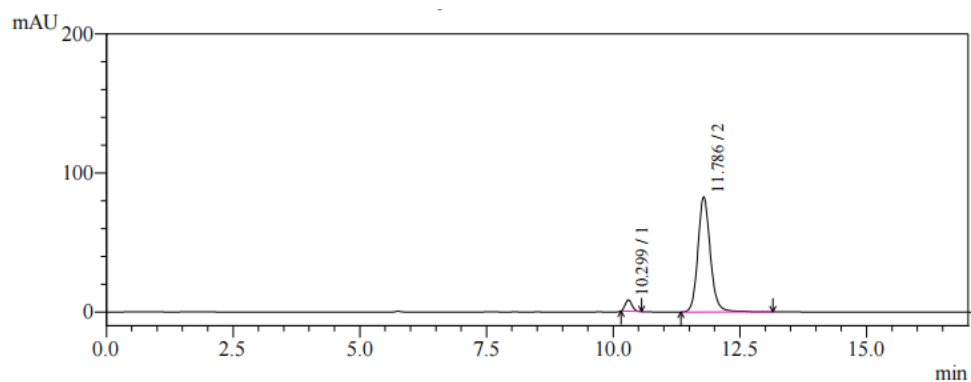

1 PDA Multi 1 / 254nm,4nm

PeakTable

| PDA Ch1 254nm |           |         |        |         |          |
|---------------|-----------|---------|--------|---------|----------|
| Peak#         | Ret. Time | Area    | Height | Area %  | Height % |
| 1             | 10.299    | 76414   | 8174   | 5.139   | 8.984    |
| 2             | 11.786    | 1410566 | 82812  | 94.861  | 91.016   |
| Total         |           | 1486981 | 90986  | 100.000 | 100.000  |

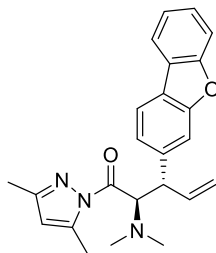

**(2R,3S)-3-(dibenzo[*b,d*]furan-3-yl)-1-(3,5-dimethyl-1*H*-pyrazol-1-yl)-2-(dimethylamino)pent-4-en-1-one (3u)** Following the general procedure, the reaction was conducted at 0.2 mmol scale, product **3u** was obtained as a colorless liquid (39.2 mg, 51% yield, *anti:syn* = 19:1).

**TLC:**  $R_f$  = 0.6 (petroleum ether/ethyl acetate 10/1).

**[ $\alpha$ ]**<sup>28</sup><sub>D</sub> = +38.8 ( $c$  = 0.32, in CH<sub>2</sub>Cl<sub>2</sub>).

**<sup>1</sup>H NMR** (400 MHz, CDCl<sub>3</sub>)  $\delta$  7.90 – 7.83 (m, 2H), 7.49 (d,  $J$  = 8.2 Hz, 1H), 7.43-7.38 (m, 1H), 7.38 – 7.33 (m, 2H), 7.33 – 7.28 (m, 1H), 6.36 – 6.23 (m, 1H), 5.68 (s, 1H), 5.50 (d,  $J$  = 11.8 Hz, 1H), 5.20 – 5.13 (m, 2H), 4.08 (dd,  $J$  = 11.8, 8.3 Hz, 1H), 2.49 (s, 6H), 2.25 (s, 3H), 2.15 (s, 3H).

**<sup>13</sup>C NMR** (101 MHz, CDCl<sub>3</sub>)  $\delta$  171.1, 156.4, 155.1, 151.5, 143.3, 140.0, 134.9, 127.9, 127.0, 124.3, 124.2, 122.6, 120.6, 116.0, 111.6, 111.32, 111.27, 66.6, 49.7, 41.3, 14.4, 13.8.

**HPLC:** 90:10 *er*, chiral stationary column: AD-H, mobile phase: hexane/*i*PrOH = 99/1, flow rate 0.5 mL/min,  $\lambda$  = 254 nm, 30 °C,  $t_r$  (major) = 15.6 min,  $t_r$  (minor) = 10.5 min.

**HRMS**  $m/z$  [M+H]<sup>+</sup> calcd for C<sub>24</sub>H<sub>26</sub>N<sub>3</sub>O<sub>2</sub><sup>+</sup> = 388.2020, found 388.2020.

### Racemic **3u**

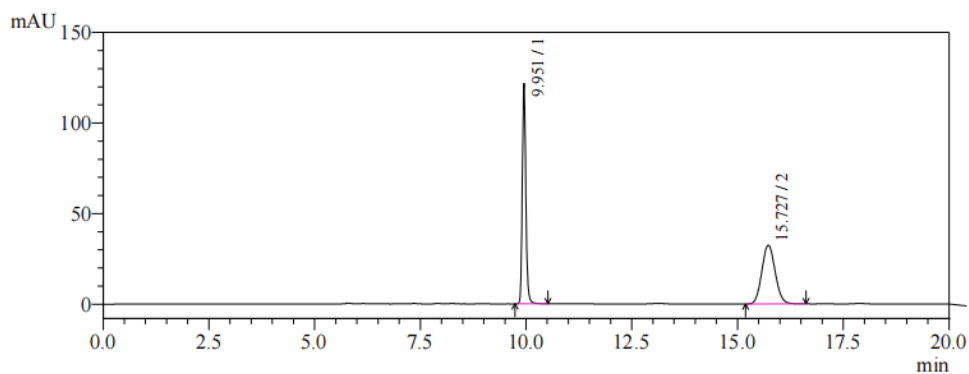

1 PDA Multi 1 / 254nm,4nm

PeakTable

PDA Ch1 254nm

| Peak# | Ret. Time | Area    | Height | Area %  | Height % |
|-------|-----------|---------|--------|---------|----------|
| 1     | 9.951     | 704952  | 121808 | 49.760  | 78.946   |
| 2     | 15.727    | 711763  | 32485  | 50.240  | 21.054   |
| Total |           | 1416715 | 154293 | 100.000 | 100.000  |

### Enantioenriched **3u**

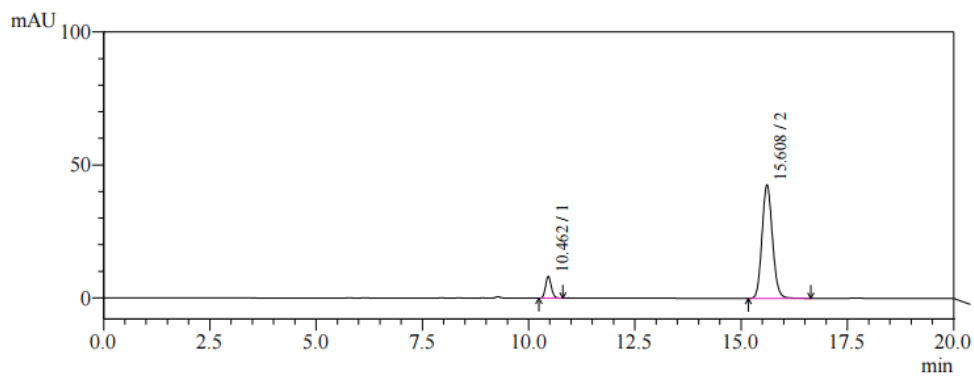

1 PDA Multi 1 / 254nm,4nm

PeakTable

PDA Ch1 254nm

| Peak# | Ret. Time | Area   | Height | Area %  | Height % |
|-------|-----------|--------|--------|---------|----------|
| 1     | 10.462    | 78029  | 8239   | 9.692   | 16.149   |
| 2     | 15.608    | 727076 | 42780  | 90.308  | 83.851   |
| Total |           | 805105 | 51020  | 100.000 | 100.000  |

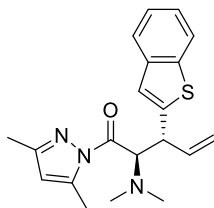

**(2R,3R)-3-(benzo[*b*]thiophen-2-yl)-1-(3,5-dimethyl-1*H*-pyrazol-1-yl)-2-(dimethylamino)pent-4-en-1-one (3v)**: Following the general procedure, the reaction was conducted at 0.1 mmol scale, product **3v** was obtained as a colorless liquid (32.3 mg, 46% yield, *anti:syn* = 10:1).

**TLC**:  $R_f = 0.6$  (petroleum ether/ethyl acetate 10/1).

$[\alpha]_D^{28} = +88.1$  ( $c = 0.24$ , in  $\text{CH}_2\text{Cl}_2$ ).

**$^1\text{H NMR}$**  (400 MHz,  $\text{CDCl}_3$ )  $\delta = 7.71 - 7.69$  (m, 1H), 7.60 – 7.56 (m, 1H), 7.24 – 7.18 (m, 2H), 7.12 (s, 1H), 6.22 – 6.13 (m, 1H), 5.83 (s, 1H), 5.39 (d,  $J = 11.6$  Hz, 1H), 5.28 – 5.17 (m, 2H), 4.33 – 4.28 (m, 1H), 2.41 (s, 9H), 2.20 (s, 3H).

**$^{13}\text{C NMR}$**   $\delta = 169.9, 151.7, 145.0, 143.7, 139.9, 139.5, 138.6, 124.0, 123.7, 123.2, 122.2, 121.4, 116.7, 111.6, 66.7, 45.1, 41.3, 14.6, 13.9$ .

**HPLC**: 96:4 *er*, chiral stationary column: OD-H, mobile phase: hexane/*i*PrOH = 99.5/0.5, flow rate 0.5 mL/min,  $\lambda = 254$  nm, 30 °C,  $t_r$  (major) = 11.4 min,  $t_r$  (minor) = 12.1 min.

**HRMS**  $m/z$   $[\text{M}+\text{H}]^+$  calcd for  $\text{C}_{20}\text{H}_{24}\text{N}_3\text{OS}^+$  = 354.1640, found 354.1639.

### Racemic **3v**

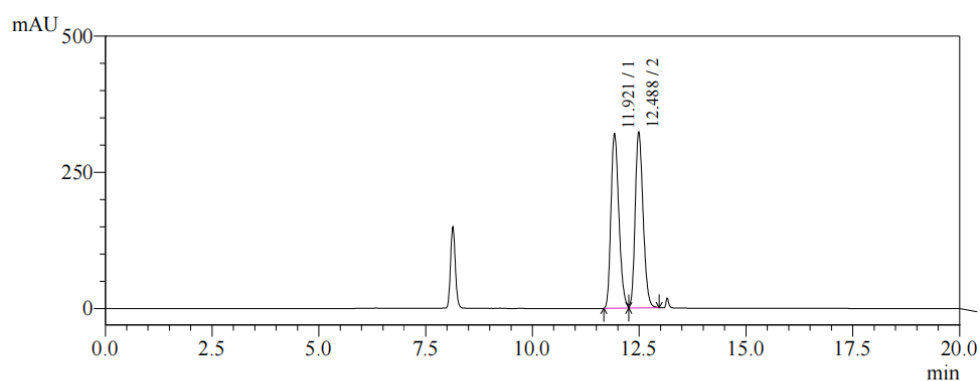

1 PDA Multi 1 / 254nm,4nm

PeakTable

| PDA Ch1 254nm |           |         |        |         |          |
|---------------|-----------|---------|--------|---------|----------|
| Peak#         | Ret. Time | Area    | Height | Area %  | Height % |
| 1             | 11.921    | 4141381 | 320937 | 49.906  | 49.822   |
| 2             | 12.488    | 4156979 | 323227 | 50.094  | 50.178   |
| Total         |           | 8298361 | 644164 | 100.000 | 100.000  |

### Enantioenriched **3v**

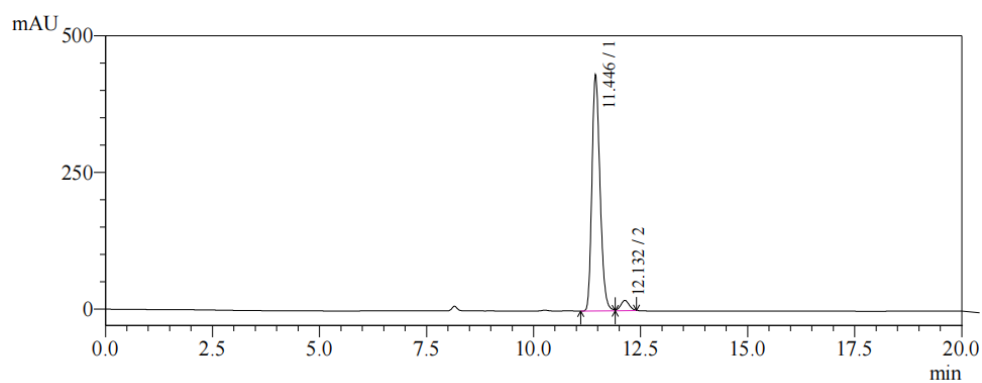

1 PDA Multi 1 / 254nm,4nm

PeakTable

| PDA Ch1 254nm |           |         |        |         |          |
|---------------|-----------|---------|--------|---------|----------|
| Peak#         | Ret. Time | Area    | Height | Area %  | Height % |
| 1             | 11.446    | 5678224 | 432895 | 95.710  | 95.885   |
| 2             | 12.132    | 254523  | 18576  | 4.290   | 4.115    |
| Total         |           | 5932747 | 451472 | 100.000 | 100.000  |

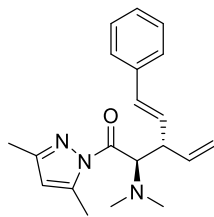

**(2R,3S,E)-1-(3,5-dimethyl-1H-pyrazol-1-yl)-2-(dimethylamino)-5-phenyl-3-vinylpent-4-en-1-one (3w):** Following the general procedure, the reaction was conducted at 0.2 mmol scale, product **3w** was obtained as a colorless liquid (26.0 mg, 41% yield, *anti:syn* >19:1).

**TLC:**  $R_f = 0.6$  (petroleum ether/ethyl acetate 10/1).

$[\alpha]_D^{28} = +14.6$  ( $c = 0.54$ , in  $\text{CH}_2\text{Cl}_2$ ).

**$^1\text{H NMR}$**  (400 MHz,  $\text{CDCl}_3$ )  $\delta = 7.25 - 7.12$  (m, 5H), 6.43 – 6.40 (m, 1H), 6.08 – 5.99 (m, 2H), 5.87 (s, 1H), 5.27 – 5.14 (m, 2H), 5.05 (d,  $J = 11.2$  Hz, 1H), 3.60 – 3.48 (m, 1H), 2.46 (s, 3H), 2.42 (s, 6H), 2.23 (s, 3H).

**$^{13}\text{C NMR}$**  (101 MHz,  $\text{CDCl}_3$ )  $\delta = 171.7, 151.7, 143.7, 138.2, 137.4, 131.8, 128.5, 128.4, 127.3, 126.3, 116.3, 111.6, 66.0, 47.7, 41.3, 14.6, 13.9$ .

**HPLC:** 96:4 *er*, chiral stationary column: OD-H, mobile phase: hexane/ $i$ PrOH = 99.5/0.5, flow rate 0.5 mL/min,  $\lambda = 254$  nm, 30 °C,  $t_r$  (major) = 10.0 min,  $t_r$  (minor) = 11.7 min.

**HRMS**  $m/z$   $[\text{M}+\text{H}]^+$  calcd for  $\text{C}_{20}\text{H}_{26}\text{N}_3\text{O}^+$  = 324.2076, found 324.2069.

### Racemic **3w**

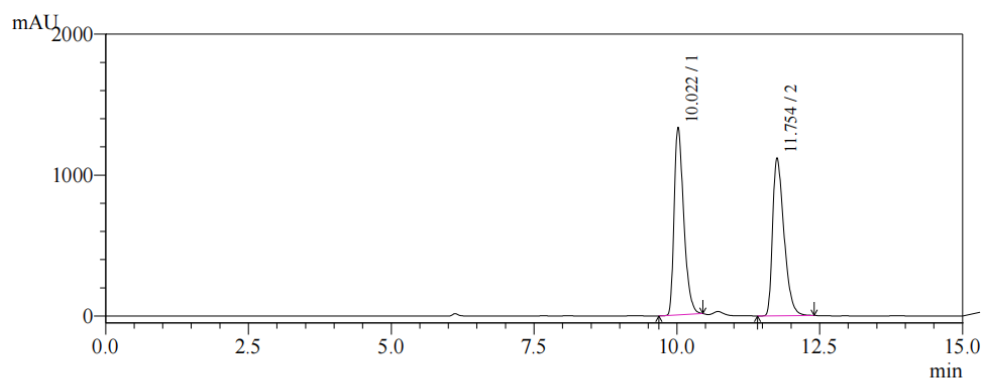

1 PDA Multi 1 / 254nm,4nm

PeakTable

PDA Ch1 254nm

| Peak# | Ret. Time | Area     | Height  | Area %  | Height % |
|-------|-----------|----------|---------|---------|----------|
| 1     | 10.022    | 15560947 | 1331159 | 50.064  | 54.250   |
| 2     | 11.754    | 15520964 | 1122590 | 49.936  | 45.750   |
| Total |           | 31081911 | 2453749 | 100.000 | 100.000  |

### Enantioenriched **3w**

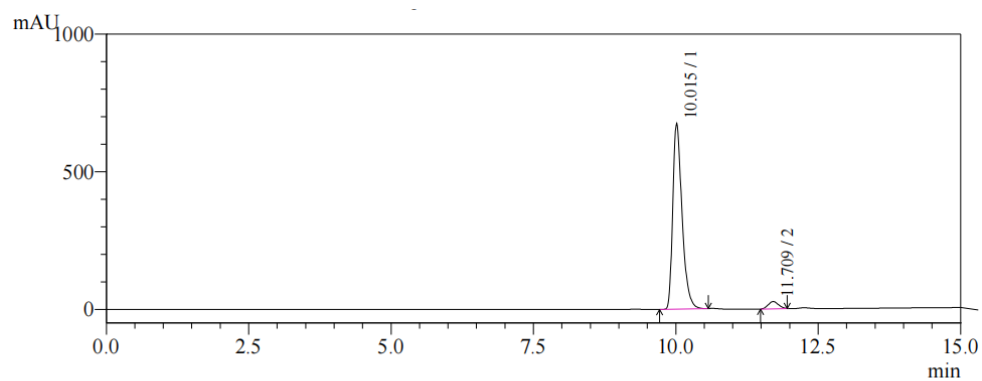

1 PDA Multi 1 / 254nm,4nm

PeakTable

PDA Ch1 254nm

| Peak# | Ret. Time | Area    | Height | Area %  | Height % |
|-------|-----------|---------|--------|---------|----------|
| 1     | 10.015    | 7643000 | 675180 | 95.871  | 96.253   |
| 2     | 11.709    | 329162  | 26285  | 4.129   | 3.747    |
| Total |           | 7972161 | 701465 | 100.000 | 100.000  |

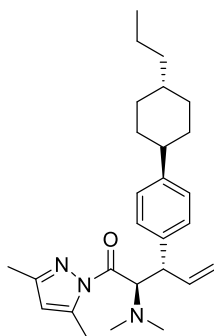

**(2R,3S)-1-(3,5-dimethyl-1H-pyrazol-1-yl)-2-(dimethylamino)-3-(4-((1R,4R)-4-propylcyclohexyl)phenyl)pent-4-en-1-one (3x)** Following the general procedure, the reaction was conducted at 0.2 mmol scale, product **3x** was obtained as a colorless liquid (45.3 mg, 54% yield, *anti:syn* = 7:1).

**TLC:**  $R_f$  = 0.6 (petroleum ether/ethyl acetate 10/1).

$[\alpha]_D^{28}$  = +61.7 ( $c$  = 0.51, in  $\text{CH}_2\text{Cl}_2$ ).

**$^1\text{H NMR}$**  (400 MHz,  $\text{CDCl}_3$ )  $\delta$  7.10 (d,  $J$  = 8.2 Hz, 2H), 6.96 (d,  $J$  = 8.2 Hz, 2H), 6.27 – 6.09 (m, 1H), 5.74 (s, 1H), 5.32 (d,  $J$  = 11.6 Hz, 1H), 5.18 – 5.08 (m, 2H), 3.86 (dd,  $J$  = 11.7, 8.7 Hz, 1H), 2.46 (s, 6H), 2.36 – 2.29 (m, 1H), 2.27 (s, 3H), 2.16 (s, 3H), 1.85 – 1.71 (m, 4H), 1.38 – 1.14 (m, 7H), 1.05 – 0.92 (m, 2H), 0.88 (t,  $J$  = 7.3 Hz, 3H).

**$^{13}\text{C NMR}$**  (101 MHz,  $\text{CDCl}_3$ )  $\delta$  171.4, 151.2, 146.1, 143.3, 139.8, 137.4, 128.2, 126.6, 115.8, 111.0, 66.5, 49.8, 44.2, 41.3, 39.8, 37.1, 34.3, 34.2, 33.6, 20.1, 14.5, 14.3, 13.8.

**HRMS**  $m/z$   $[\text{M}+\text{H}]^+$  calcd for  $\text{C}_{27}\text{H}_{40}\text{N}_3\text{O}^+$  = 422.3166, found 422.3167.



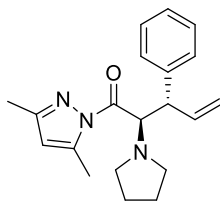

**(2R,3S)-1-(3,5-dimethyl-1H-pyrazol-1-yl)-3-phenyl-2-(pyrrolidin-1-yl)pent-4-en-1-one (3aa):**

Following the general procedure, the reaction performed at 50 °C and was conducted at 0.2 mmol scale, product **3aa** was obtained as a white solid (24.0 mg, 37% yield, *anti:syn* = 10:1), M.p. 62 – 64 °C.

**TLC:**  $R_f$  = 0.8 (petroleum ether/ethyl acetate 10/1).

$[\alpha]_D^{20}$  = +75.0 ( $c$  = 0.16, in  $\text{CH}_2\text{Cl}_2$ ).

**$^1\text{H NMR}$**  (400 MHz,  $\text{CDCl}_3$ )  $\delta$  7.22 (d,  $J$  = 7.8 Hz, 2H), 7.15 (t,  $J$  = 7.5 Hz, 2H), 7.07 (t,  $J$  = 7.2 Hz, 1H), 6.33 – 6.16 (m, 1H), 5.77 (s, 1H), 5.62 – 5.52 (m, 1H), 5.15 – 5.02 (m, 2H), 4.00 – 3.90 (m, 1H), 2.92 (s, 2H), 2.74 (s, 2H), 2.28 (s, 3H), 2.18 (s, 3H), 1.79 – 1.64 (m, 4H).

**$^{13}\text{C NMR}$**  (101 MHz,  $\text{CDCl}_3$ )  $\delta$  171.6, 151.4, 143.4, 140.7, 140.0, 128.5, 128.3, 126.6, 115.7, 111.1, 63.3, 50.8, 48.3, 23.6, 14.4, 13.9.

**HPLC:** 89:11 *er*, chiral stationary column: OD, mobile phase: hexane/*i*PrOH = 99.7/0.3, flow rate 0.5 mL/min,  $\lambda$  = 254 nm, 30 °C,  $t_r$  (major) = 11.6 min,  $t_r$  (minor) = 21.7 min.

**HRMS**  $m/z$   $[\text{M}+\text{H}]^+$  calcd for  $\text{C}_{20}\text{H}_{26}\text{N}_3\text{O}^+$  = 324.2070, found 324.2071.

### Racemic 3aa

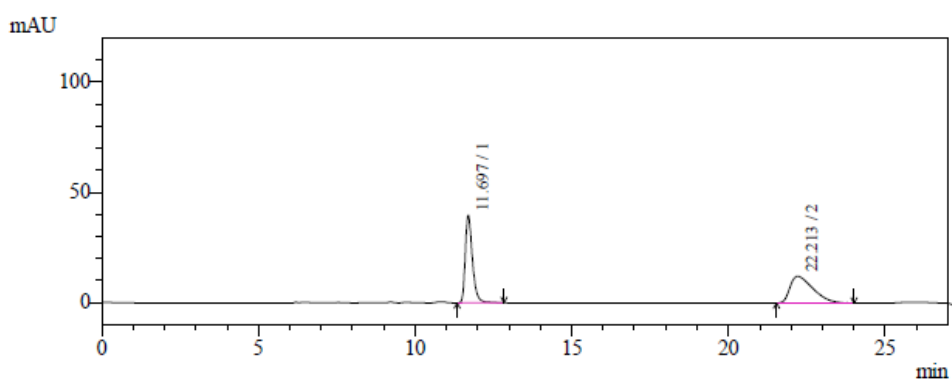

1 PDA Multi 1 / 254nm,4nm

PeakTable

PDA Ch1 254nm

| Peak# | Ret. Time | Area    | Height | Area %  | Height % |
|-------|-----------|---------|--------|---------|----------|
| 1     | 11.697    | 632521  | 39779  | 50.298  | 76.608   |
| 2     | 22.213    | 625026  | 12147  | 49.702  | 23.392   |
| Total |           | 1257547 | 51925  | 100.000 | 100.000  |

### Enantioenriched 3aa

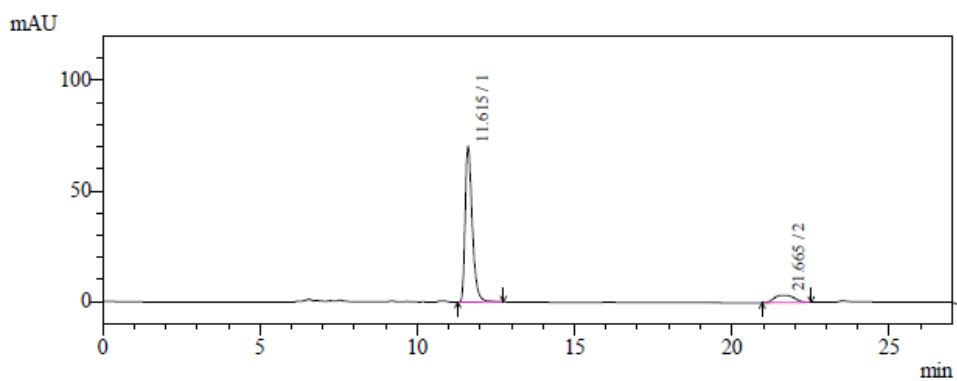

1 PDA Multi 1 / 254nm,4nm

PeakTable

PDA Ch1 254nm

| Peak# | Ret. Time | Area    | Height | Area %  | Height % |
|-------|-----------|---------|--------|---------|----------|
| 1     | 11.615    | 1112486 | 70588  | 88.545  | 95.661   |
| 2     | 21.665    | 143915  | 3202   | 11.455  | 4.339    |
| Total |           | 1256401 | 73790  | 100.000 | 100.000  |

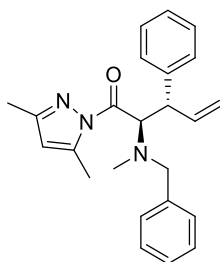

**(2*R*,3*S*)-2-(benzyl(methyl)amino)-1-(3,5-dimethyl-1*H*-pyrazol-1-yl)-3-phenylpent-4-en-1-one (3ab):** Following the general procedure, the reaction performed at 50 °C and was conducted at 0.2 mmol scale, product **3ab** was obtained as a white solid (39.0 mg, 52% yield, *anti:syn* = 5:1), M.p. 75 – 86 °C.

**TLC:**  $R_f$  = 0.8 (petroleum ether/ethyl acetate 10/1).

**[ $\alpha$ ]**<sup>20</sup><sub>D</sub> = +42.5 ( $c$  = 0.32, in CH<sub>2</sub>Cl<sub>2</sub>).

**<sup>1</sup>H NMR** (400 MHz, CDCl<sub>3</sub>)  $\delta$  7.37 – 7.34 (m, 2H), 7.33 – 7.28 (m, 2H), 7.27 – 7.23 (m, 3H), 7.20 – 7.14 (m, 2H), 7.12 – 7.08 (m, 1H), 6.38 – 6.26 (m, 1H), 5.81 (s, 1H), 5.50 (d,  $J$  = 11.7 Hz, 1H), 5.14 (dd,  $J$  = 29.6, 13.7 Hz, 2H), 4.04 (dd,  $J$  = 11.6, 8.2 Hz, 1H), 3.86 (d,  $J$  = 13.9 Hz, 1H), 3.75 (d,  $J$  = 13.9 Hz, 1H), 2.35 (s, 3H), 2.32 (s, 3H), 2.17 (s, 3H).

**<sup>13</sup>C NMR** (101 MHz, CDCl<sub>3</sub>)  $\delta$  172.0, 171.3, 151.7, 151.3, 143.7, 143.4, 141.2, 140.5, 140.1, 140.0, 139.9, 138.7, 128.7, 128.6, 128.5, 128.3, 128.1, 127.9, 126.8, 126.6, 126.5, 116.6, 116.0, 111.7, 111.2, 66.5, 66.0, 58.1, 57.9, 50.3, 49.8, 37.6, 37.5, 14.7, 14.4, 14.0, 13.8.

**HPLC:** 75:25 *er*, chiral stationary column: OD, mobile phase: hexane/<sup>*i*</sup>PrOH = 99.7/0.3, flow rate 0.5 mL/min,  $\lambda$  = 254 nm, 30 °C,  $t_r$  (major) = 17.1 min,  $t_r$  (minor) = 22.2 min.

**HRMS**  $m/z$  [M+H]<sup>+</sup> calcd for C<sub>24</sub>H<sub>28</sub>N<sub>3</sub>O<sup>+</sup> = 374.2227, found 374.2227.

Racemic **3ab**

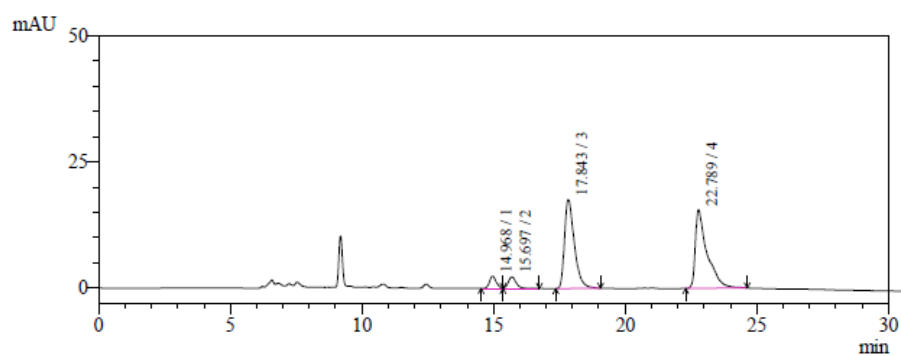

PeakTable

PDA Ch1 254nm

| Peak# | Ret. Time | Area    | Height | Area %  | Height % |
|-------|-----------|---------|--------|---------|----------|
| 1     | 14.968    | 43940   | 2436   | 4.238   | 6.414    |
| 2     | 15.697    | 48730   | 2295   | 4.700   | 6.044    |
| 3     | 17.843    | 458449  | 17639  | 44.215  | 46.443   |
| 4     | 22.789    | 485745  | 15610  | 46.848  | 41.100   |
| Total |           | 1036864 | 37980  | 100.000 | 100.000  |

Enantioenriched **3ab**

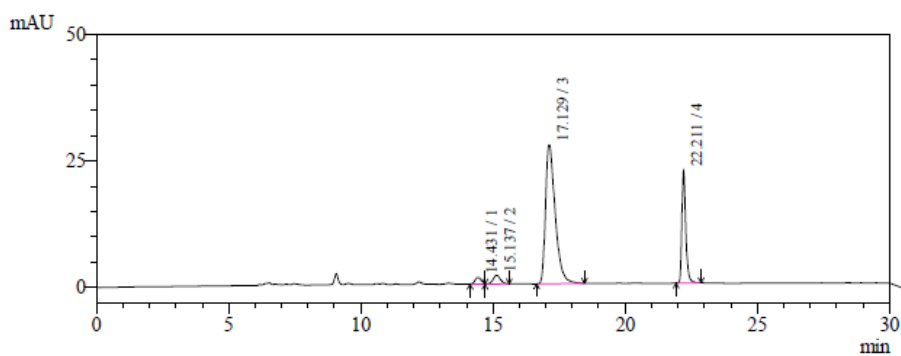

PeakTable

PDA Ch1 254nm

| Peak# | Ret. Time | Area   | Height | Area %  | Height % |
|-------|-----------|--------|--------|---------|----------|
| 1     | 14.431    | 21773  | 1317   | 2.216   | 2.491    |
| 2     | 15.137    | 33150  | 1719   | 3.374   | 3.252    |
| 3     | 17.129    | 698452 | 27536  | 71.085  | 52.100   |
| 4     | 22.211    | 229184 | 22281  | 23.325  | 42.156   |
| Total |           | 982559 | 52852  | 100.000 | 100.000  |

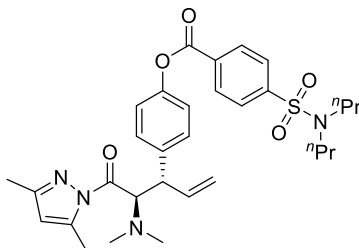

**4-((3*S*,4*R*)-5-(3,5-dimethyl-1*H*-pyrazol-1-yl)-4-(dimethylamino)-5-oxopent-1-en-3-yl)phenyl 4-(*N,N*-dipropylsulfamoyl)benzoate (**3ca**):** Following the general procedure, the reaction was conducted at 0.2 mmol scale, product **3ca** was obtained as a colorless liquid (52.0 mg, 45% yield, *anti:syn* = 8:1).

**TLC:**  $R_f$  = 0.6 (petroleum ether/ethyl acetate 10/1).

**[ $\alpha$ ]**<sub>D</sub><sup>28</sup> = +28.2 (*c* = 0.95, in CH<sub>2</sub>Cl<sub>2</sub>).

**<sup>1</sup>H NMR** (400 MHz, CDCl<sub>3</sub>)  $\delta$  = 8.32 – 8.25 (m, 2H), 7.97 – 7.90 (m, 2H), 7.37 – 7.31 (m, 2H), 7.10 – 7.02 (m, 2H), 6.27 – 6.18 (m, 1H), 5.86 (s, 1H), 5.40 (d, *J* = 11.7 Hz, 1H), 5.23 – 5.13 (m, 2H), 4.02 – 3.97 (m, 1H), 3.18 – 3.11 (m, 4H), 2.48 (s, 6H), 2.39 (s, 3H), 2.21 (s, 3H), 1.63 – 1.54 (m, 4H), 0.91 (t, *J* = 7.4 Hz, 6H).

**<sup>13</sup>C NMR (101 MHz, CDCl<sub>3</sub>)**  $\delta$  = 170.7, 163.7, 151.6, 149.3, 144.9, 143.5, 139.4, 138.5, 138.4, 133.0, 130.9, 130.8, 129.7, 129.5, 127.2, 121.5, 121.2, 116.9, 116.3, 111.7, 111.5, 66.3, 50.0, 49.2, 41.3, 22.0, 14.7, 14.5, 13.9, 11.2.

**HPLC:** 93:7 *er*, chiral stationary column: IA, mobile phase: hexane/<sup>*n*</sup>PrOH = 95/5, flow rate 1.0 mL/min,  $\lambda$  = 254 nm, 30 °C,  $t_r$  (major) = 9.7 min,  $t_r$  (minor) = 8.2 min.

**HRMS**  $m/z$  [M+H]<sup>+</sup> calcd for C<sub>31</sub>H<sub>41</sub>N<sub>4</sub>O<sub>5</sub>S<sup>+</sup> = 581.2792, found 581.2797.

### Racemic **3ca**

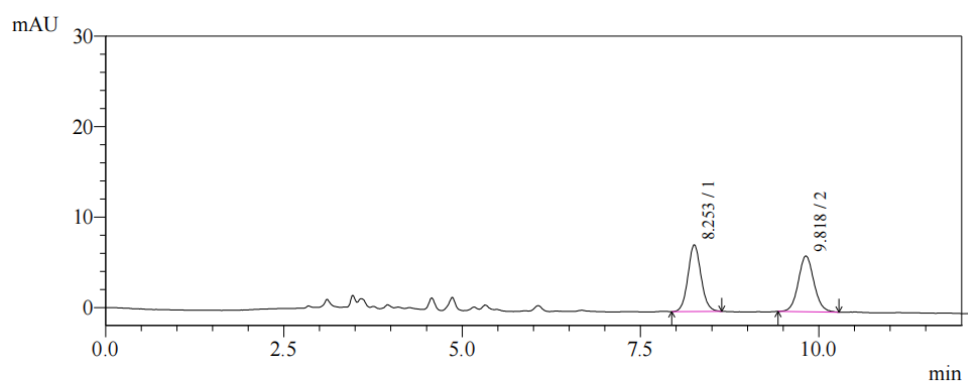

PeakTable

PDA Ch1 254nm

| Peak# | Ret. Time | Area   | Height | Area %  | Height % |
|-------|-----------|--------|--------|---------|----------|
| 1     | 8.253     | 94449  | 7399   | 50.141  | 54.522   |
| 2     | 9.818     | 93917  | 6171   | 49.859  | 45.478   |
| Total |           | 188366 | 13570  | 100.000 | 100.000  |

### Enantioenriched **3ca**

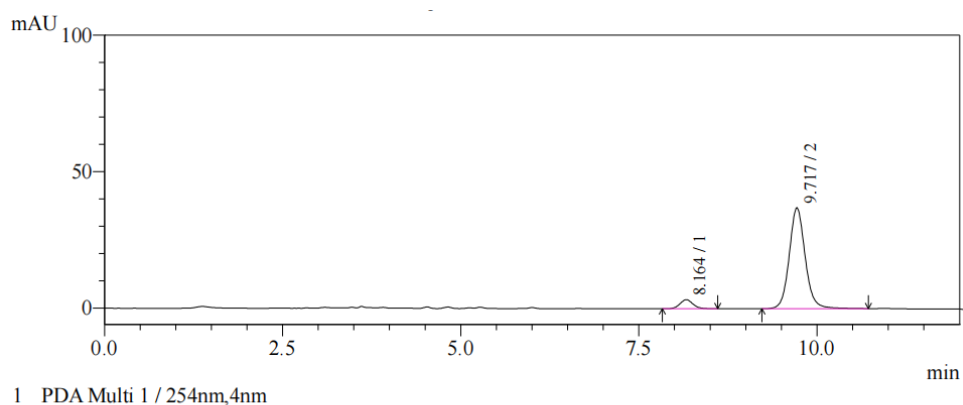

PeakTable

PDA Ch1 254nm

| Peak# | Ret. Time | Area   | Height | Area %  | Height % |
|-------|-----------|--------|--------|---------|----------|
| 1     | 8.164     | 42875  | 3334   | 6.927   | 8.262    |
| 2     | 9.717     | 576058 | 37019  | 93.073  | 91.738   |
| Total |           | 618933 | 40353  | 100.000 | 100.000  |

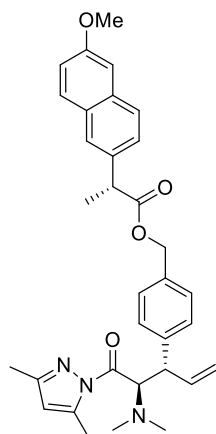

**4-((3*S*,4*R*)-5-(3,5-dimethyl-1*H*-pyrazol-1-yl)-4-(dimethylamino)-5-oxopent-1-en-3-yl)benzyl (R)-2-(6-methoxynaphthalen-2-yl)propanoate (3cb)** Following the general procedure, the reaction was conducted at 0.2 mmol scale, product **3cb** was obtained as a colorless liquid (61.7 mg, 57% yield, *anti:syn* = 10:1).

**TLC:**  $R_f$  = 0.6 (petroleum ether/ethyl acetate 10/1).

$[\alpha]_D^{28}$  = +40.5 ( $c$  = 0.60, in  $\text{CH}_2\text{Cl}_2$ ).

**$^1\text{H NMR}$**  (400 MHz,  $\text{CDCl}_3$ )  $\delta$  7.89 (dd,  $J$  = 8.6, 4.7 Hz, 2H), 7.84 (s, 1H), 7.58 (dd,  $J$  = 8.5, 1.8 Hz, 1H), 7.42 – 7.32 (m, 4H), 7.27 (d,  $J$  = 8.1 Hz, 2H), 6.45 – 6.33 (m, 1H), 5.97 (s, 1H), 5.56 (d,  $J$  = 11.7 Hz, 1H), 5.38 – 5.29 (m, 2H), 5.26 (d,  $J$  = 12.5 Hz, 1H), 5.16 (d,  $J$  = 12.5 Hz, 1H), 4.15 – 4.05 (m, 5H), 2.66 (s, 6H), 2.52 (s, 3H), 2.37 (s, 3H), 1.78 (d,  $J$  = 7.2 Hz, 3H).

**$^{13}\text{C NMR}$**  (101 MHz,  $\text{CDCl}_3$ )  $\delta$  174.5, 174.4, 170.7, 170.6, 157.7, 157.6, 151.5, 151.4, 143.4, 143.3, 140.4, 140.3, 139.5, 139.4, 135.6, 135.5, 134.3, 134.2, 133.7, 133.6, 129.34, 129.25, 129.0, 128.9, 128.6, 128.5, 128.0, 127.9, 127.2, 127.1, 126.3, 126.2, 126.0, 125.9, 119.0, 118.9, 116.1, 116.0, 111.3, 111.2, 105.6, 105.5, 66.3, 66.2, 55.4, 55.3, 49.6, 49.5, 45.5, 45.4, 41.3, 41.2, 18.7, 18.6, 14.4, 14.3, 13.8, 13.7.

**HRMS**  $m/z$   $[\text{M}+\text{H}]^+$  calcd for  $\text{C}_{33}\text{H}_{38}\text{N}_3\text{O}_4^+$  = 540.2857, found 540.2858.

## 7. Synthetic applications

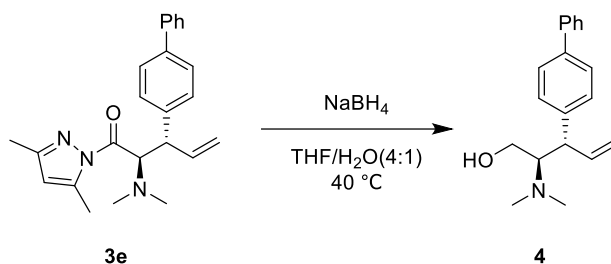

The product **3e** (0.1 mmol) in THF/H<sub>2</sub>O (0.8 mL/0.2 mL) was added NaBH<sub>4</sub> (8.0 equiv.) at 0 °C, and the resulting solution was stirred 36 h at 40 °C. After quenching with 1.0 M HCl, the resultant mixture was extracted with EtOAc. The combined organic layer was washed with brine and dried over Na<sub>2</sub>SO<sub>4</sub>. After evaporation of the organic solvent under reduced pressure, the crude mixture was purified by silica gel column chromatography to give **4**.

**(2R,3S)-3-([1,1'-biphenyl]-4-yl)-2-(dimethylamino)pent-4-en-1-ol (4)** the reaction was conducted at 0.1 mmol scale, product **4** was obtained as a white solid (24.0 mg, 85% yield, *anti:syn* =19:1), M.p. 135 – 137 °C.

**TLC:** R<sub>f</sub> = 0.2 (ethyl acetate).

**[α]<sub>D</sub><sup>28</sup>** = +88.03 (*c* = 0.44, in CH<sub>2</sub>Cl<sub>2</sub>).

**<sup>1</sup>H NMR** (400 MHz, CDCl<sub>3</sub>) δ 7.64 – 7.52 (m, 4H), 7.52 – 7.42 (m, 2H), 7.42 – 7.33 (m, 1H), 7.26 (d, *J* = 8.0 Hz, 2H), 6.31 – 6.18 (m, 1H), 5.21 (dd, *J* = 16.9, 1.3 Hz, 1H), 5.14 – 5.10 (M, 1H), 3.58 (t, *J* = 8.9 Hz, 1H), 3.20 – 3.08 (m, 3H), 2.65 – 2.60 (m, 6H), 2.50 (s, 1H).

**<sup>13</sup>C NMR** (101 MHz, CDCl<sub>3</sub>) δ 141.1, 140.8, 140.7, 139.7, 128.8, 127.9, 127.7, 127.3, 127.1, 115.8, 68.1, 59.8, 51.2, 40.7.

**HPLC:** 95:5 *er*, chiral stationary column: OD-H, mobile phase: hexane/<sup>*i*</sup>PrOH = 97/3, flow rate 1.0 mL/min, λ = 254 nm, 30 °C, t<sub>r</sub> (major) = 9.0 min, t<sub>r</sub> (minor) = 12.3 min.

**HRMS** m/z [M+H]<sup>+</sup> calcd for C<sub>19</sub>H<sub>24</sub>NO<sup>+</sup> = 282.1852, found 282.1850.



### Racemic 4

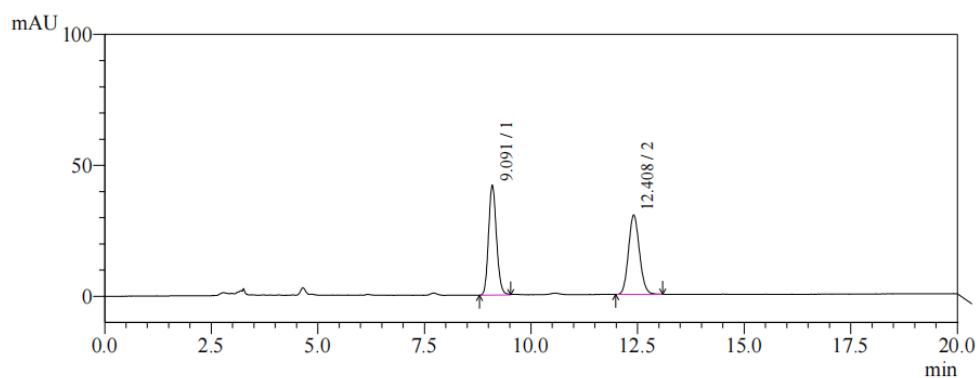

1 PDA Multi 1 / 254nm,4nm

PeakTable

| PDA Ch1 254nm |           |         |        |         |          |
|---------------|-----------|---------|--------|---------|----------|
| Peak#         | Ret. Time | Area    | Height | Area %  | Height % |
| 1             | 9.091     | 543811  | 41989  | 50.104  | 58.022   |
| 2             | 12.408    | 541563  | 30378  | 49.896  | 41.978   |
| Total         |           | 1085374 | 72366  | 100.000 | 100.000  |

### Enantioenriched 4

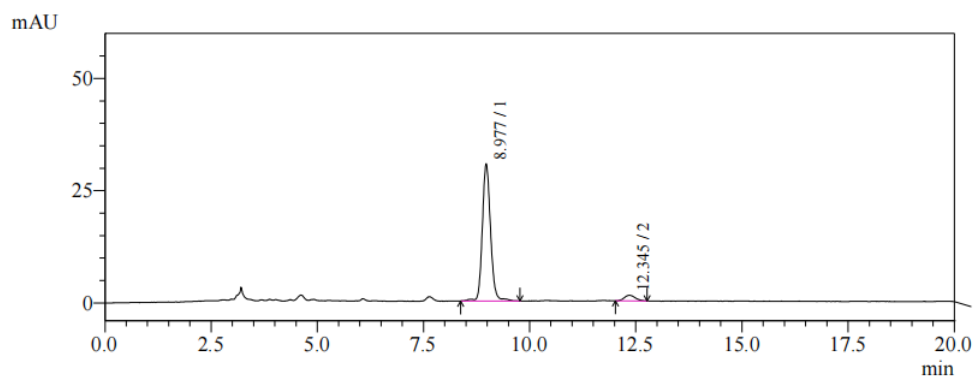

1 PDA Multi 1 / 254nm,4nm

PeakTable

| PDA Ch1 254nm |           |        |        |         |          |
|---------------|-----------|--------|--------|---------|----------|
| Peak#         | Ret. Time | Area   | Height | Area %  | Height % |
| 1             | 8.977     | 412164 | 30575  | 94.801  | 96.061   |
| 2             | 12.345    | 22602  | 1254   | 5.199   | 3.939    |
| Total         |           | 434766 | 31828  | 100.000 | 100.000  |

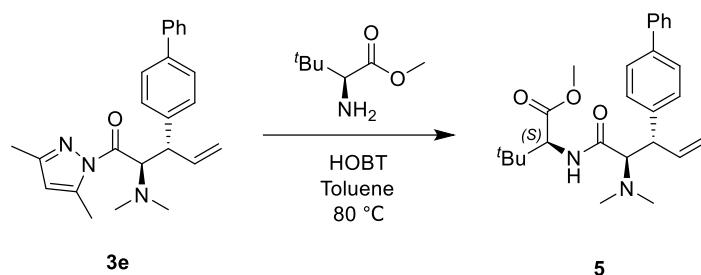

The product **3e** (0.1 mmol), methyl (2*S*)-2-amino-3,3-dimethylbutanoate (2.0 equiv.), HOBT (2.0 equiv.) and toluene (1.0 mL) was added into a reaction tube equipped with a stirring bar. Then the tube was stirred 24h at 80 °C. The mixture was concentrated under reduced pressure and the crude residue was purified by silica gel column chromatography to give product **5**.

#### Methyl

**(*S*)-2-((2*R*,3*S*)-3-([1,1'-biphenyl]-4-yl)-2-(dimethylamino)pent-4-enamido)-3,3-dimethylbutanoate (**5**)** the reaction was conducted at 0.1 mmol scale, product **5** was obtained as a white solid (31.9 mg, 76% yield, *anti:syn* =19:1), M.p. 156 – 158 °C.

**TLC:**  $R_f$  = 0.2 (petroleum ether/ethyl acetate 1/1).

**$[\alpha]_D^{28}$**  = +30.63 ( $c$  = 0.37, in  $\text{CH}_2\text{Cl}_2$ ).

**$^1\text{H NMR}$**  (400 MHz,  $\text{CDCl}_3$ )  $\delta$  7.56 – 7.49 (m, 4H), 7.48 – 7.43 (m, 2H), 7.39 – 7.33 (m, 3H), 6.33 – 6.15 (m, 1H), 5.89 (d,  $J$  = 9.5 Hz, 1H), 5.21 (dd,  $J$  = 14.1, 2.7 Hz, 2H), 4.29 (d,  $J$  = 9.4 Hz, 1H), 4.00 – 3.87 (m, 1H), 3.71 (s, 3H), 3.40 (d,  $J$  = 10.9 Hz, 1H), 2.48 (s, 6H), 0.58 (s, 9H).

**$^{13}\text{C NMR}$**  (101 MHz,  $\text{CDCl}_3$ )  $\delta$  172.3, 168.5, 141.1, 140.3, 140.1, 138.9, 128.9, 128.8, 127.6, 127.2, 127.1, 116.4, 73.6, 59.2, 51.8, 49.6, 41.5, 34.7, 26.1.

**HRMS**  $m/z$   $[\text{M}+\text{H}]^+$  calcd for  $\text{C}_{26}\text{H}_{35}\text{N}_2\text{O}_3^+$  = 423.2642, found 423.2639.

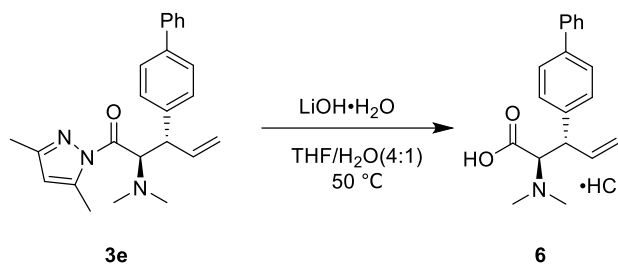

The product **3e** (0.1 mmol) in THF/H<sub>2</sub>O (0.8 mL/0.2 mL) was added LiOH·H<sub>2</sub>O (8.0 equiv.) at 0 °C, and the resulting solution was stirred 36h at 50 °C. After quenching with 4.0 M HCl, the resultant mixture was extracted with EtOAc (3 × equal volume) and dried over Na<sub>2</sub>SO<sub>4</sub>. After evaporation of the organic solvent under reduced pressure, the crude mixture was purified by silica gel column chromatography to give **6**.

**(2R,3S)-3-([1,1'-biphenyl]-4-yl)-2-(dimethylamino)pent-4-enoic acid hydrochloride (6)** the reaction was conducted at 0.1 mmol scale, product **6** was obtained as a white solid (21.2 mg, 64% yield, *anti:syn* = 19:1), M.p. 89 – 91 °C.

**TLC:** R<sub>f</sub> = 0.2 (dichloromethane/CH<sub>3</sub>OH 10/1).

**[α]<sub>D</sub><sup>28</sup>** = -1.61 (*c* = 0.31, in CH<sub>3</sub>OH).

**<sup>1</sup>H NMR** (400 MHz, MeOD) δ 7.55 – 7.47 (m, 4H), 7.41 – 7.32 (m, 4H), 7.30 – 7.21 (m, 1H), 6.19 – 6.07 (m, 1H), 5.32 (dd, *J* = 17.0, 1.4 Hz, 1H), 5.20 (dd, *J* = 10.1, 1.3 Hz, 1H), 4.02 – 3.88 (m, 2H), 2.87 (s, 6H).

**<sup>13</sup>C NMR** (101 MHz, MeOD) δ 169.0, 140.6, 140.2, 138.1, 137.1, 128.7, 128.5, 127.04, 126.95, 126.5, 117.9, 73.2, 49.6, 40.7.

**Er** was determined on the corresponding **3e** (95:5 *er*, see compound **3e**).

**HRMS** *m/z* [M+H]<sup>+</sup> calcd for C<sub>19</sub>H<sub>22</sub>NO<sub>2</sub><sup>+</sup> = 296.1645, found 296.1646.

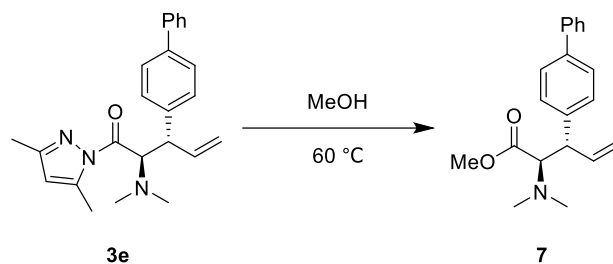

The product **3e** (0.1 mmol) was dissolved in 1.0 mL of methanol. The reaction was stirred at 60 °C overnight. After the reaction was completed, the solution was concentrated under vacuum, and the residue was purified by silica gel chromatography to give the desired product **7**.

**methyl (2R,3S)-3-([1,1'-biphenyl]-4-yl)-2-(dimethylamino)pent-4-enoate (7)** the reaction was conducted at 0.1 mmol scale, product **7** was obtained as a white solid (27.8 mg, 90% yield, *anti:syn* =19:1), M.p. 98 – 99 °C.

**TLC:**  $R_f = 0.5$  (petroleum ether/ethyl acetate 10/1).

$[\alpha]_D^{28} = -4.8$  ( $c = 0.08$ , in  $\text{CH}_2\text{Cl}_2$ ).

**$^1\text{H NMR}$**  (400 MHz,  $\text{CDCl}_3$ )  $\delta$  7.59 – 7.55 (m, 2H), 7.54 – 7.49 (m, 2H), 7.45 – 7.39 (m, 2H), 7.35 – 7.29 (m, 1H), 7.29 – 7.25 (m, 2H), 6.23 – 6.08 (m, 1H), 5.19 – 5.10 (m, 2H), 3.81 (dd,  $J = 11.7, 8.6$  Hz, 1H), 3.62 (d,  $J = 11.7$  Hz, 1H), 3.45 (s, 3H), 2.41 (s, 6H).

**$^{13}\text{C NMR}$**  (101 MHz,  $\text{CDCl}_3$ )  $\delta$  170.2, 140.8, 139.9, 139.7, 138.8, 128.8, 128.6, 127.32, 127.25, 127.0, 116.3, 71.7, 50.7, 49.5, 41.4.

**HPLC:** 96:4 *er*, chiral stationary column: OJ-H, mobile phase: hexane/*i*PrOH = 99.5/0.5, flow rate 1.0 mL/min,  $\lambda = 254$  nm, 30 °C,  $t_r$  (major) = 19.8 min,  $t_r$  (minor) = 26.4 min.

**HRMS**  $m/z$   $[\text{M}+\text{H}]^+$  calcd for  $\text{C}_{20}\text{H}_{24}\text{NO}_2^+$  = 310.1802, found 310.1800.

### Racemic 7

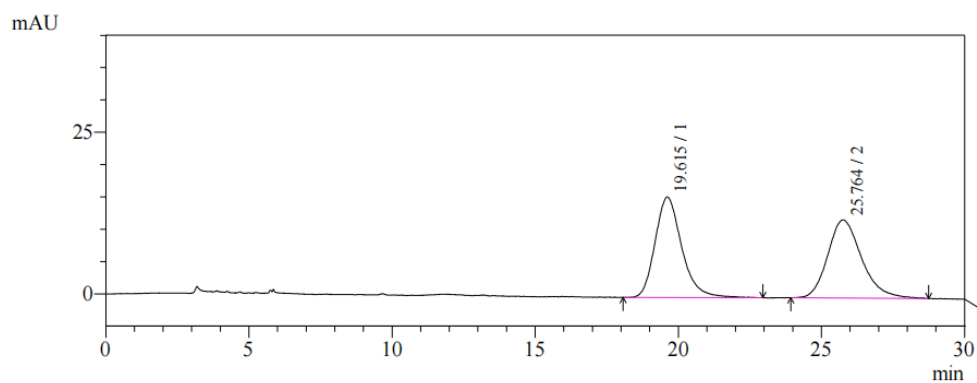

1 PDA Multi 1 / 254nm,4nm

PeakTable

| PDA Ch1 254nm |           |         |        |         |          |
|---------------|-----------|---------|--------|---------|----------|
| Peak#         | Ret. Time | Area    | Height | Area %  | Height % |
| 1             | 19.615    | 1004039 | 15554  | 50.247  | 56.292   |
| 2             | 25.764    | 994160  | 12077  | 49.753  | 43.708   |
| Total         |           | 1998198 | 27630  | 100.000 | 100.000  |

### Enantioenriched 7

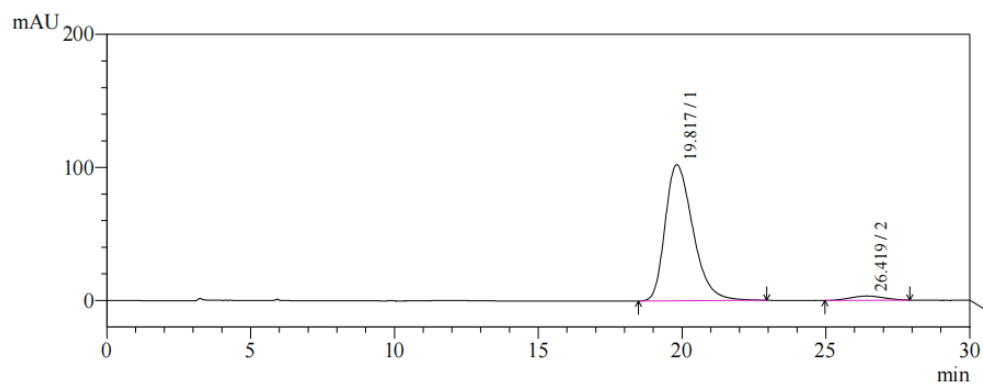

1 PDA Multi 1 / 254nm,4nm

PeakTable

| PDA Ch1 254nm |           |         |        |         |          |
|---------------|-----------|---------|--------|---------|----------|
| Peak#         | Ret. Time | Area    | Height | Area %  | Height % |
| 1             | 19.817    | 6877815 | 102285 | 96.096  | 96.821   |
| 2             | 26.419    | 279455  | 3358   | 3.904   | 3.179    |
| Total         |           | 7157270 | 105643 | 100.000 | 100.000  |

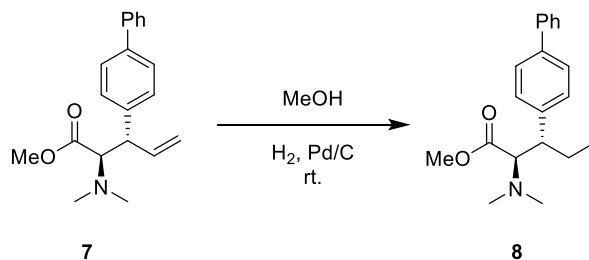

The product **7** (0.1 mmol) and 10% Pd/C was dissolved in 1 mL MeOH under H<sub>2</sub> atmosphere. The reaction was stirred at rt. overnight. After the reaction was completed, the solution was concentrated under vacuum, and the residue was purified by silica gel chromatography to give the desired product **8**.

**methyl (2R,3S)-3-([1,1'-biphenyl]-4-yl)-2-(dimethylamino)pentanoate (8)** the reaction was conducted at 0.1 mmol scale, product **8** was obtained as a white solid (28.3 mg, 91% yield, *anti:syn* =19:1), M.p. 133 – 135 °C.

**TLC:** R<sub>f</sub> = 0.7 (petroleum ether/ethyl acetate 10/1).

**[α]<sub>D</sub><sup>28</sup>** = +98.4 (*c* = 0.1, in CH<sub>2</sub>Cl<sub>2</sub>).

**<sup>1</sup>H NMR** (400 MHz, CDCl<sub>3</sub>) δ 7.61 – 7.56 (m, 2H), 7.54 – 7.48 (m, 2H), 7.42 (dd, *J* = 8.3, 7.0 Hz, 2H), 7.35 – 7.29 (m, 1H), 7.23 (d, *J* = 8.3 Hz, 2H), 3.42 (d, *J* = 11.4 Hz, 1H), 3.38 (s, 3H), 2.98 – 2.87 (m, 1H), 2.39 (s, 6H), 2.20 – 2.03 (m, 1H), 1.57 – 1.48 (m, 1H), 0.76 (t, *J* = 7.4 Hz, 3H).

**<sup>13</sup>C NMR** (101 MHz, CDCl<sub>3</sub>) δ 170.8, 140.9, 140.5, 139.3, 129.0, 128.7, 127.1, 126.92, 126.86, 72.4, 50.3, 46.6, 41.4, 24.8, 11.6.

**HPLC:** 95:5 *er*, chiral stationary column: OJ-H, mobile phase: hexane/<sup>i</sup>PrOH = 99.5/0.5, flow rate 0.5 mL/min, λ = 254 nm, 30 °C, t<sub>r</sub> (major) = 22.6 min, t<sub>r</sub> (minor) = 27.5 min.

**HRMS** m/z [M+H]<sup>+</sup> calcd for C<sub>20</sub>H<sub>26</sub>NO<sub>2</sub><sup>+</sup> = 312.1958, found 312.1955.

### Racemic 8

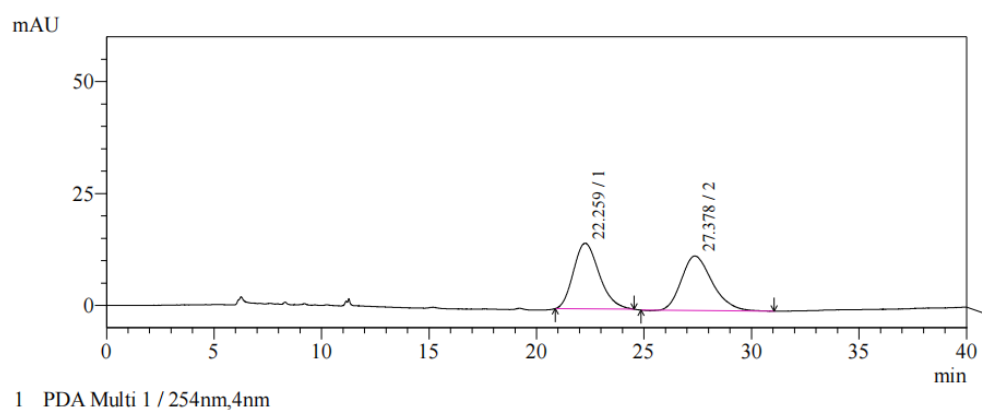

1 PDA Multi 1 / 254nm,4nm

PeakTable

| PDA Ch1 254nm |           |         |        |         |          |
|---------------|-----------|---------|--------|---------|----------|
| Peak#         | Ret. Time | Area    | Height | Area %  | Height % |
| 1             | 22.259    | 1226100 | 14668  | 50.285  | 54.626   |
| 2             | 27.378    | 1212220 | 12184  | 49.715  | 45.374   |
| Total         |           | 2438319 | 26851  | 100.000 | 100.000  |

### Enantioenriched 8

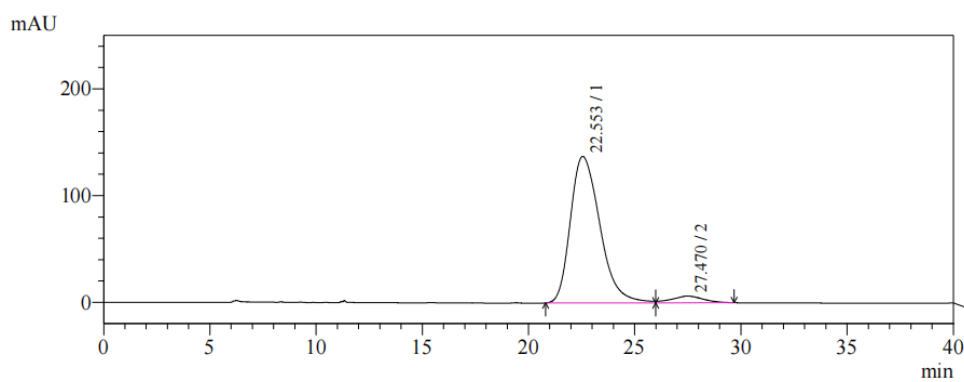

1 PDA Multi 1 / 254nm,4nm

PeakTable

| PDA Ch1 254nm |           |          |        |         |          |
|---------------|-----------|----------|--------|---------|----------|
| Peak#         | Ret. Time | Area     | Height | Area %  | Height % |
| 1             | 22.553    | 13268654 | 137314 | 95.383  | 95.624   |
| 2             | 27.470    | 642274   | 6285   | 4.617   | 4.376    |
| Total         |           | 13910928 | 143598 | 100.000 | 100.000  |

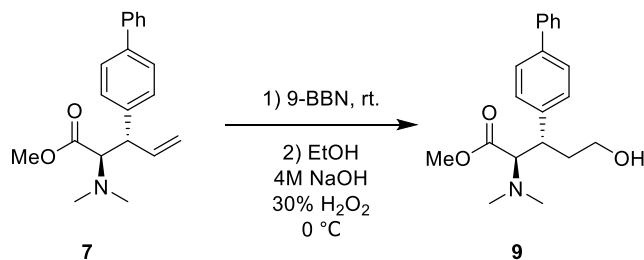

The product **7** (0.1 mmol) was dissolved in 9-BBN (0.5 M in tetrahydrofuran, 0.4 mL, 0.20 mmol) under N<sub>2</sub> atmosphere, and the resulting solution was stirred 24 h at room temperature. The reaction was diluted with ethanol (1.0 mL) and treated with 4 M sodium hydroxide (0.2 mL). Then 30% hydrogen peroxide (0.3 mL) was added dropwise at 0 °C. The reaction was stirred at 0 °C for 1 h, then quenched by addition of saturated NH<sub>4</sub>Cl. The mixture was extracted with diethyl ether. The combine organic phase was washed with brine, dried over Na<sub>2</sub>SO<sub>4</sub>, and concentrated under reduced pressure. The residue was purified by column chromatography to give the desired product **9**.

**methyl (2R,3S)-3-([1,1'-biphenyl]-4-yl)-2-(dimethylamino)-5-hydroxypentanoate (9)** the reaction was conducted at 0.1 mmol scale, product **9** was obtained as a white solid (27.2 mg, 83% yield, *anti:syn* = 19:1), M.p. 79 – 81 °C.

**TLC:** R<sub>f</sub> = 0.2 (petroleum ether/ethyl acetate 2/1).

**[α]<sub>D</sub><sup>28</sup>** = -0.95 (*c* = 0.35, in CH<sub>2</sub>Cl<sub>2</sub>).

**<sup>1</sup>H NMR** (400 MHz, CDCl<sub>3</sub>) δ 7.64 – 7.58 (m, 2H), 7.57 – 7.52 (m, 2H), 7.51 – 7.41 (m, 2H), 7.40 – 7.32 (m, 1H), 7.32 – 7.24 (m, 2H), 3.80 – 3.69 (m, 1H), 3.65 – 3.53 (m, 2H), 3.40 (s, 3H), 3.30 – 3.21 (m, 1H), 2.49 (s, 6H), 2.26 – 2.14 (m, 1H), 2.06 – 1.96 (m, 1H).

**<sup>13</sup>C NMR** (101 MHz, CDCl<sub>3</sub>) δ 170.1, 141.2, 140.7, 139.7, 128.8, 128.5, 127.3, 127.2, 127.0, 72.3, 61.3, 50.8, 44.5, 41.6, 39.0.

**HPLC:** 95:5 *er*, chiral stationary column: OJ-H, mobile phase: hexane/<sup>n</sup>PrOH = 90/10, flow rate 1.0 mL/min, λ = 254 nm, 30 °C, t<sub>r</sub> (major) = 14.4 min, t<sub>r</sub> (minor) = 17.6 min.

**HRMS** m/z [M+H]<sup>+</sup> calcd for C<sub>20</sub>H<sub>26</sub>NO<sub>3</sub><sup>+</sup> = 328.1907, found 328.1905.



Racemic **9**

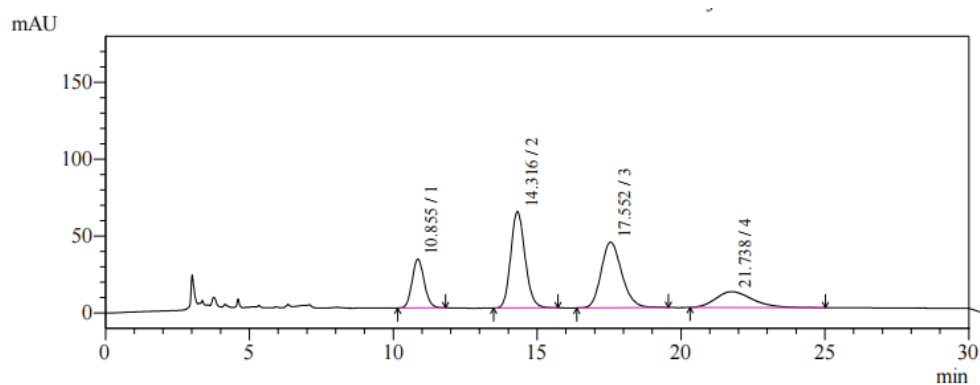

1 PDA Multi 1 / 254nm,4nm

PeakTable

| PDA Ch1 254nm |           |         |        |         |          |
|---------------|-----------|---------|--------|---------|----------|
| Peak#         | Ret. Time | Area    | Height | Area %  | Height % |
| 1             | 10.855    | 928805  | 31781  | 15.125  | 21.540   |
| 2             | 14.316    | 2178817 | 62784  | 35.480  | 42.552   |
| 3             | 17.552    | 2128407 | 42733  | 34.659  | 28.963   |
| 4             | 21.738    | 904956  | 10246  | 14.736  | 6.945    |
| Total         |           | 6140986 | 147545 | 100.000 | 100.000  |

Enantioenriched **9**

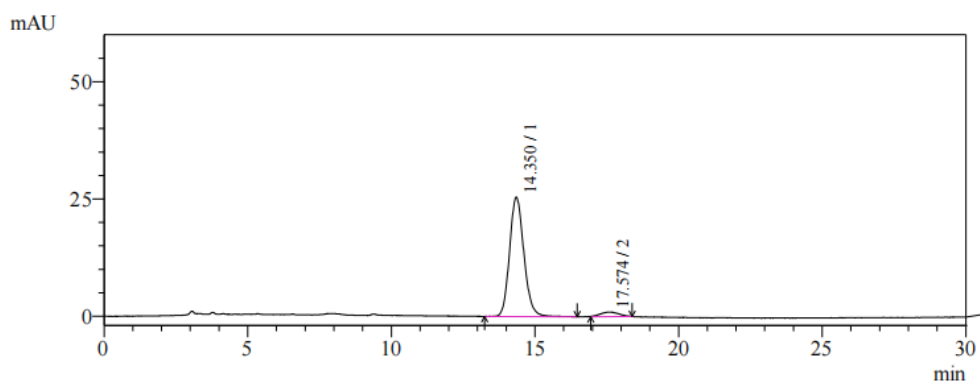

1 PDA Multi 1 / 254nm,4nm

PeakTable

| PDA Ch1 254nm |           |        |        |         |          |
|---------------|-----------|--------|--------|---------|----------|
| Peak#         | Ret. Time | Area   | Height | Area %  | Height % |
| 1             | 14.350    | 883880 | 25501  | 95.251  | 96.293   |
| 2             | 17.574    | 44070  | 982    | 4.749   | 3.707    |
| Total         |           | 927950 | 26483  | 100.000 | 100.000  |

## 8. Determination of the absolute configuration

a) This work:

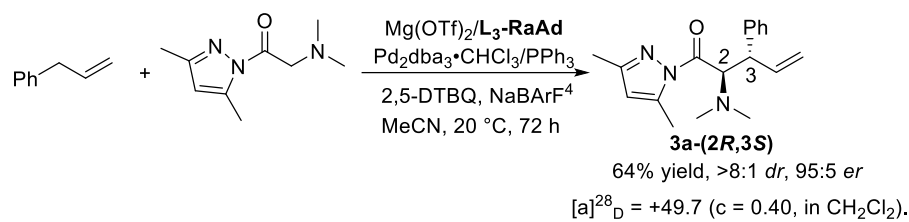

b) Our previous work: *Chem. Sci.*, **2020**, *11*, 3068-3073.

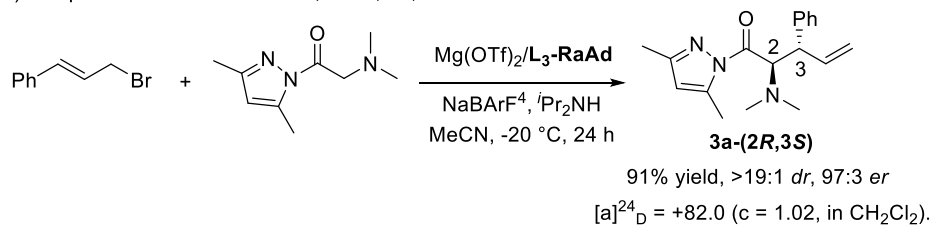

The reaction depicted in Eq (b) was run according to our previous report (*Chem. Sci.* **2020**, *11*, 3068-3073). The compound **3a** prepared by our previous method is (2*R*,3*S*) configuration in 97:3 *er*, and its optical rotation has been measured as  $[\alpha]_{24}^D = +82.0$  ( $c = 1.02$ ,  $\text{CH}_2\text{Cl}_2$ ,  $\lambda = 589$  mm).

In the present manuscript, the sample of **3a** was prepared in 95:5 *er* and its optical rotation was measured as  $[\alpha]_{28}^D = +49.7$  ( $c = 0.40$ ,  $\text{CH}_2\text{Cl}_2$ ,  $\lambda = 589$  mm). Therefore, we assigned **3a** as (2*R*,3*S*) configuration.

## 9. Control experiment

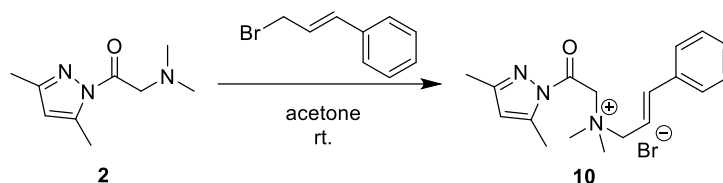

The reaction was conducted with dimethylglycine pyrazoleamide (**2**, 0.1 mmol) and cinnamyl bromide (0.1 mmol) in 2.0 mL of acetone. The mixture was stirred at room temperature overnight under a N<sub>2</sub> atmosphere, and then concentrated in vacuo to give product **10**.

**<sup>1</sup>H NMR** (400 MHz, D<sub>2</sub>O) δ 7.26 (d, *J* = 7.1 Hz, 2H), 7.18 (d, *J* = 6.9 Hz, 3H), 6.67 (d, *J* = 15.7 Hz, 1H), 6.23 – 6.11 (m, 1H), 5.97 (s, 1H), 4.60 (s, 2H), 4.15 (d, *J* = 7.7 Hz, 2H), 3.19 (s, 5H), 2.31 (s, 3H), 1.95 (s, 3H).

**<sup>13</sup>C NMR** (101 MHz, D<sub>2</sub>O) δ 163.7, 155.8, 145.8, 143.5, 134.7, 129.6, 128.9, 127.2, 114.3, 112.7, 67.6, 61.1, 51.9, 13.6, 12.8.

**HRMS** *m/z* [M+H]<sup>+</sup> calcd for C<sub>18</sub>H<sub>24</sub>N<sub>3</sub>O<sup>+</sup> = 298.1914, found 298.1906.

In order to gain insight into the catalytic mechanism, a series of control experiments to investigate the [2,3]-rearrangement of allylic ammonium salt **10** were subsequently performed. The results summarized as below:

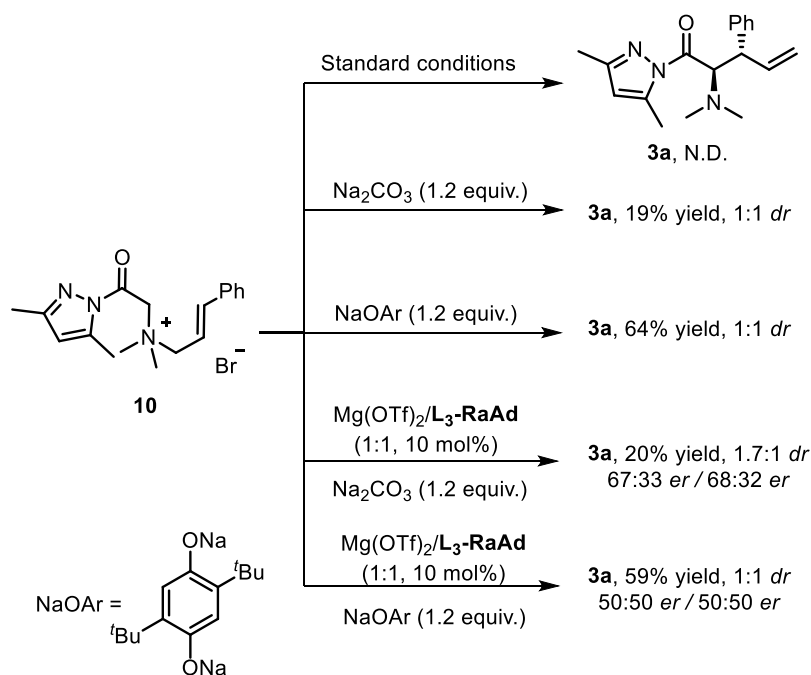

Note: All the reactions were conducted at MeCN, 20 °C, 72 h

## 10. Initial Rate Kinetic Isotope Effects (KIE) study

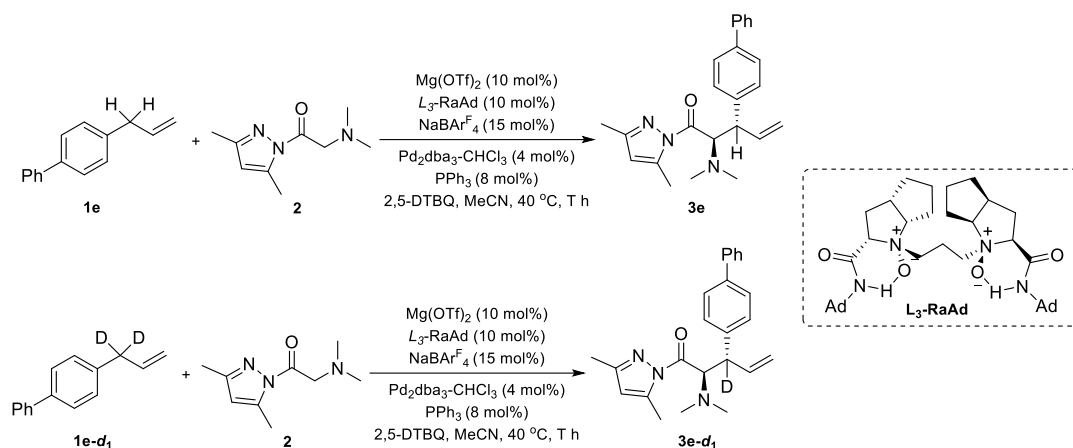

Under an  $\text{N}_2$  atmosphere, the tube was added  $\text{Mg}(\text{OTf})_2$  (0.01 mmol, 10mol%),  $N,N'$ -dioxides ligand  $L_3\text{-RaAd}$  (0.01 mmol, 10 mol%), amino amide **2** (0.1 mmol, 1.0 equiv.) and MeCN (0.5 mL). Another tube was added  $\text{Pd}_2(\text{dba})_3\cdot\text{CHCl}_3$  (4 mol%),  $\text{PPh}_3$  (8 mol%) and MeCN (0.5 mL). After being stirred at 35 °C for 1 h, two tubes were mixed, and 2,5-DTBQ (1.5 equiv.) and terminal alkene **1e/1e-d<sub>2</sub>** (0.2 mmol, 2.0 equiv.) were added sequentially. Then the reaction mixture was stirred at 40 °C. The concentration of **3e** and **3e-d<sub>1</sub>** was monitored by NMR  $^1\text{H}$  analysis. The results were shown in Figure S1. The KIE ( $k_H/k_D$ ) was calculated to be 2.9 (Figure S1).

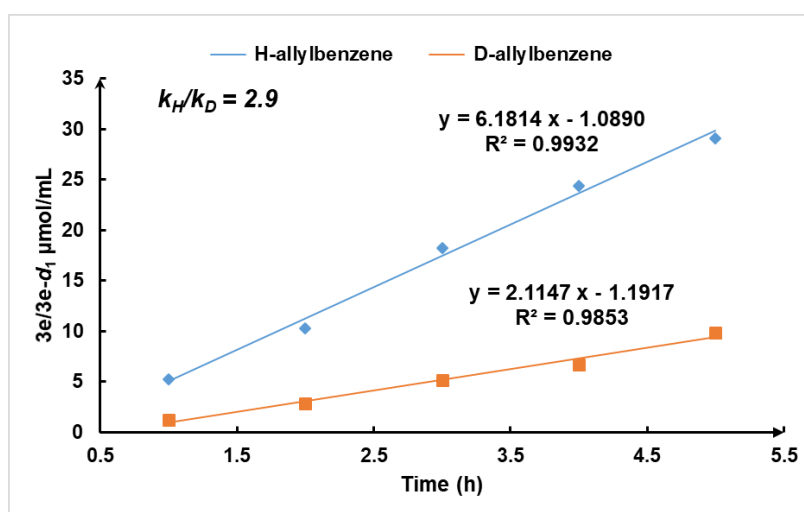

Figure S1: Graph illustrating the KIE data. Slopes were fit using a least square linear regression model.

## 11. NMR spectrum

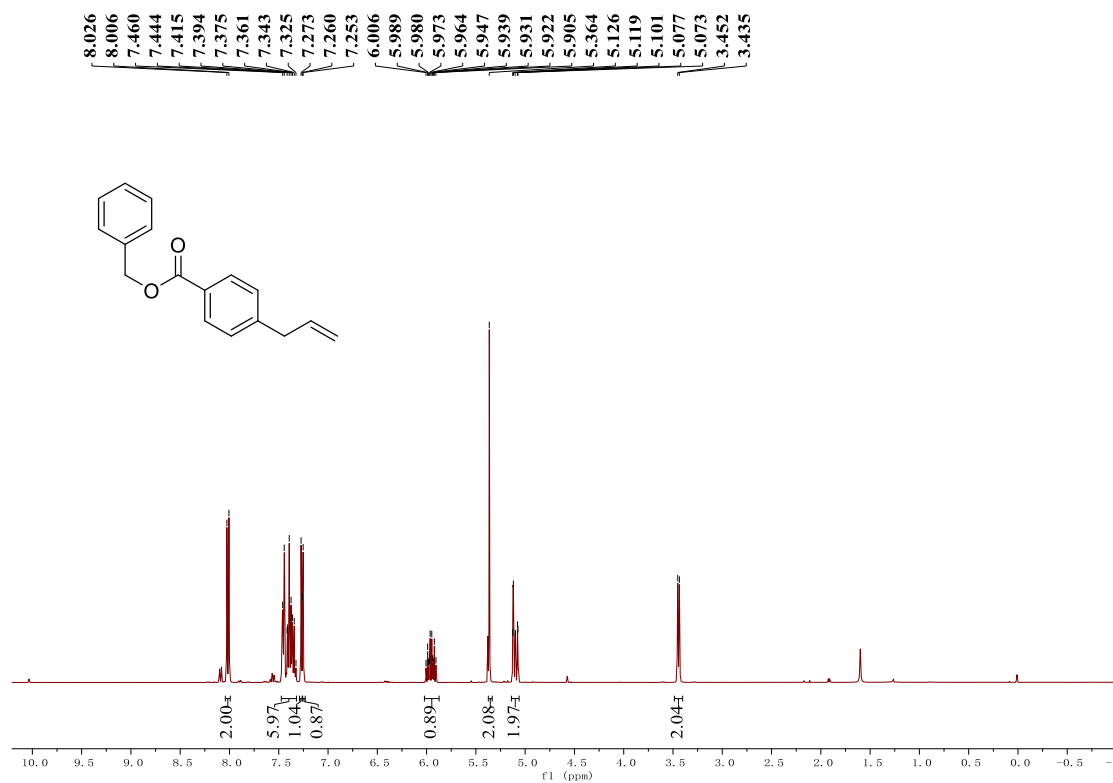

<sup>1</sup>H NMR of Compound **1p** (400 MHz, CDCl<sub>3</sub>)

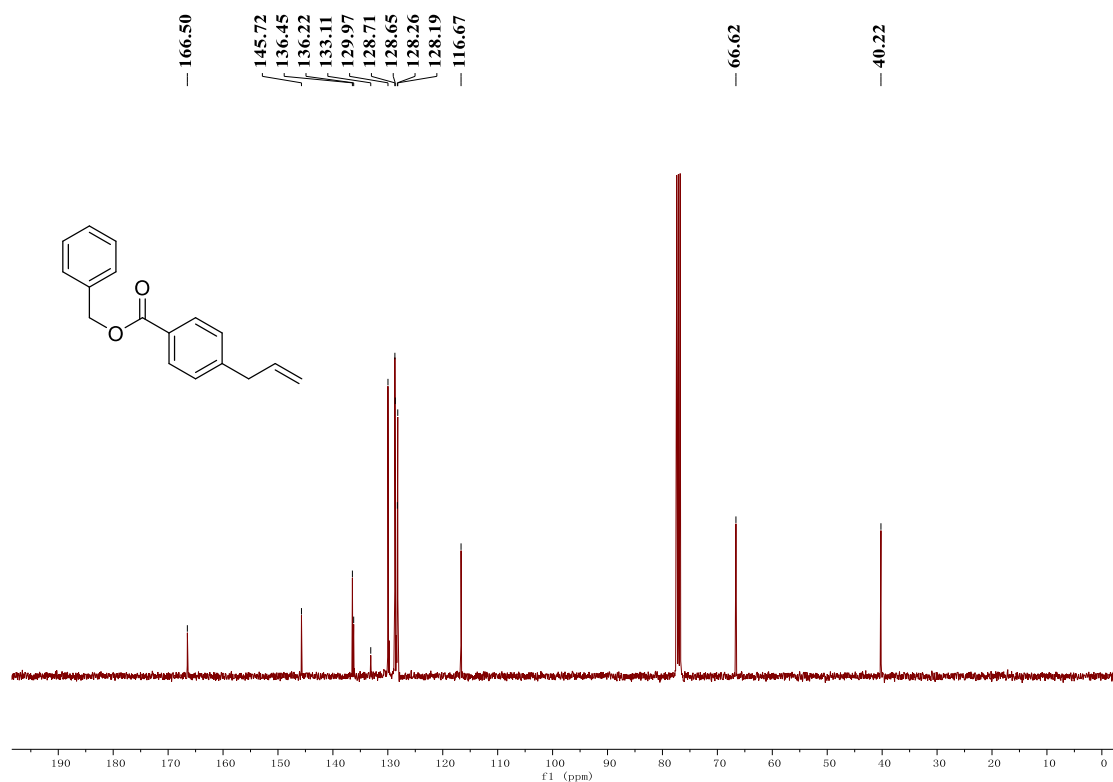

<sup>13</sup>C NMR of Compound **1p** (101 MHz, CDCl<sub>3</sub>)

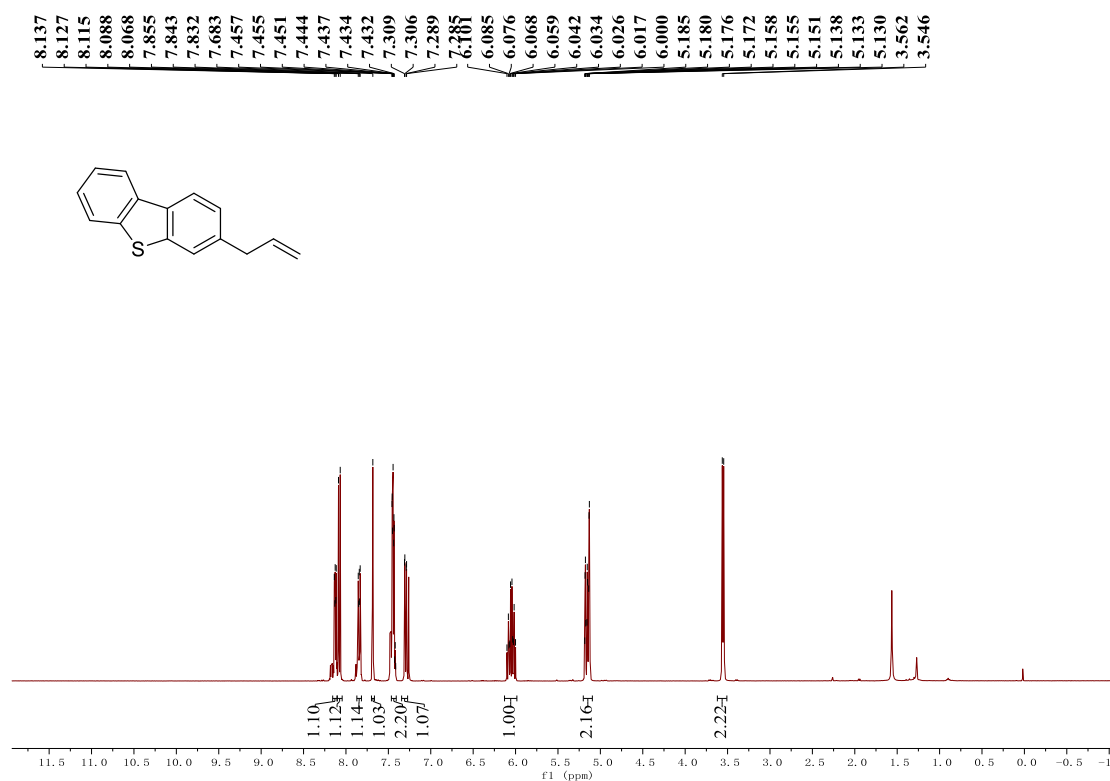

<sup>1</sup>H NMR of Compound 1t (400 MHz, CDCl<sub>3</sub>)

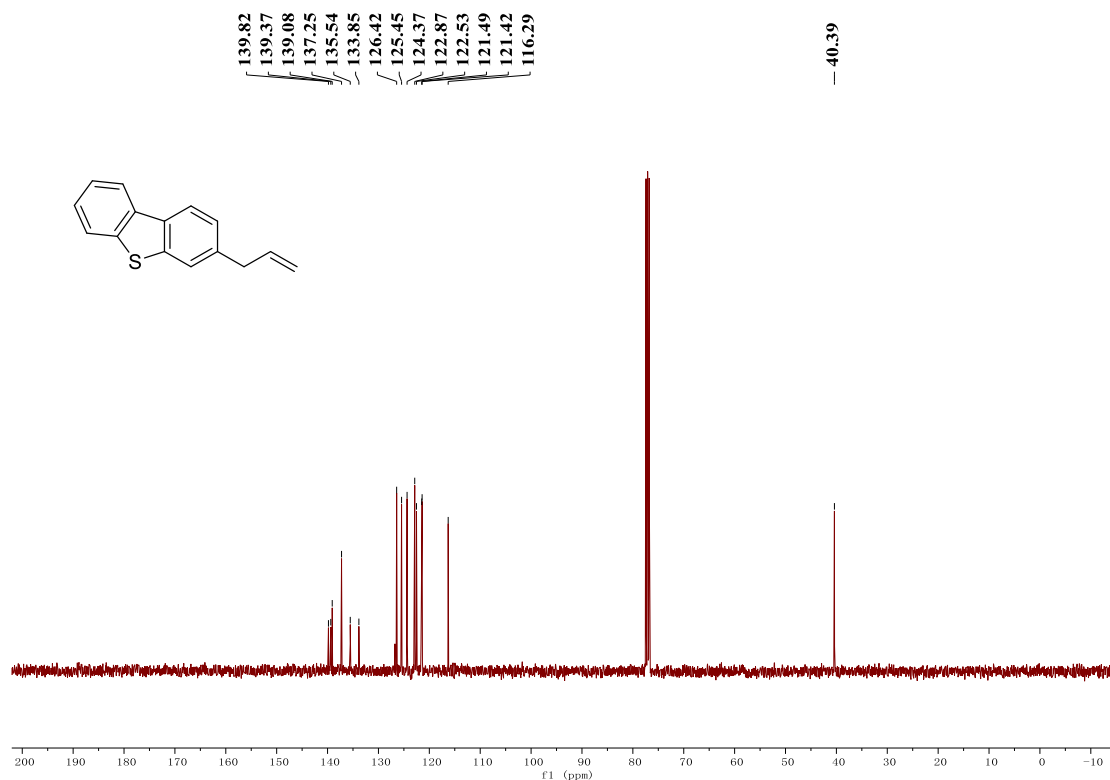

<sup>13</sup>C NMR of Compound 1t (101 MHz, CDCl<sub>3</sub>)

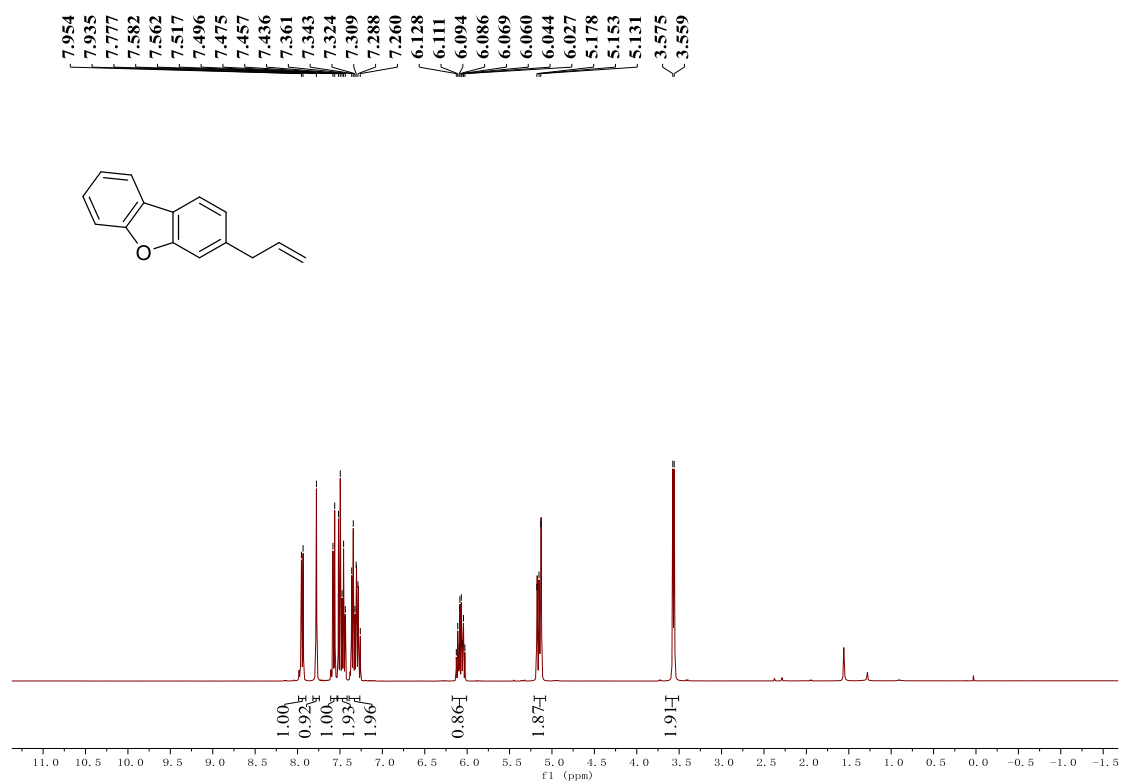

<sup>1</sup>H NMR of Compound **1u** (400 MHz, CDCl<sub>3</sub>)

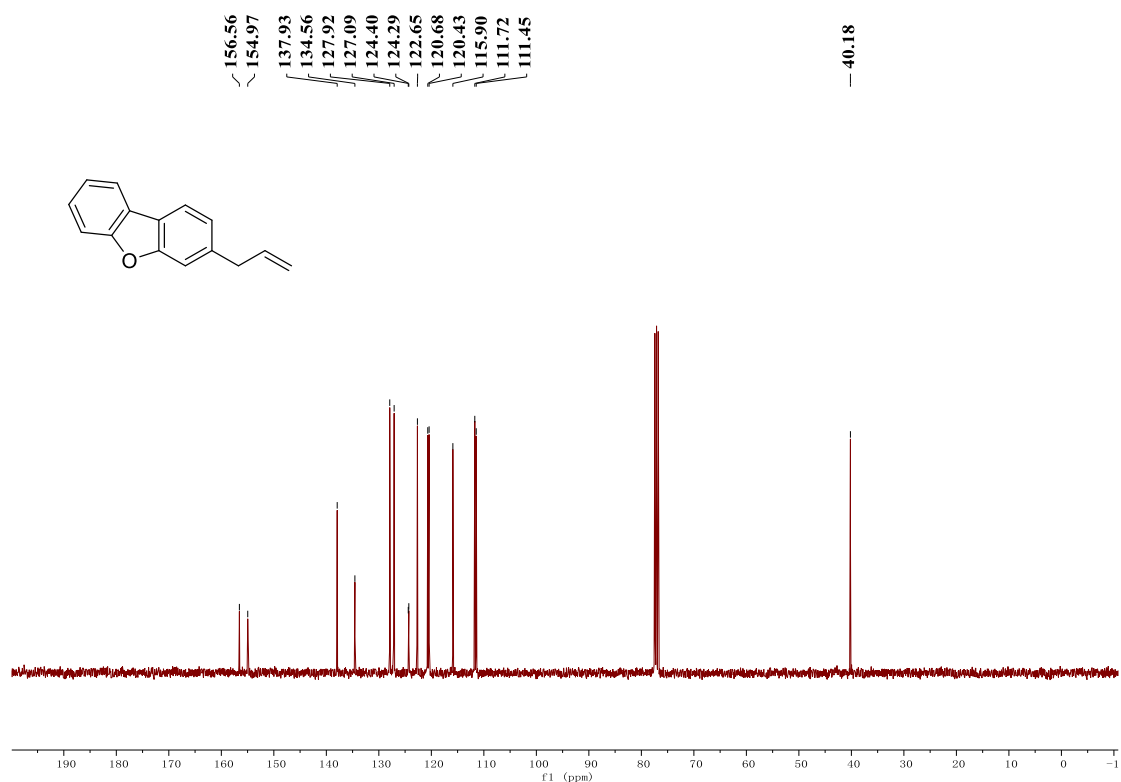

<sup>13</sup>C NMR of Compound **1u** (101 MHz, CDCl<sub>3</sub>)

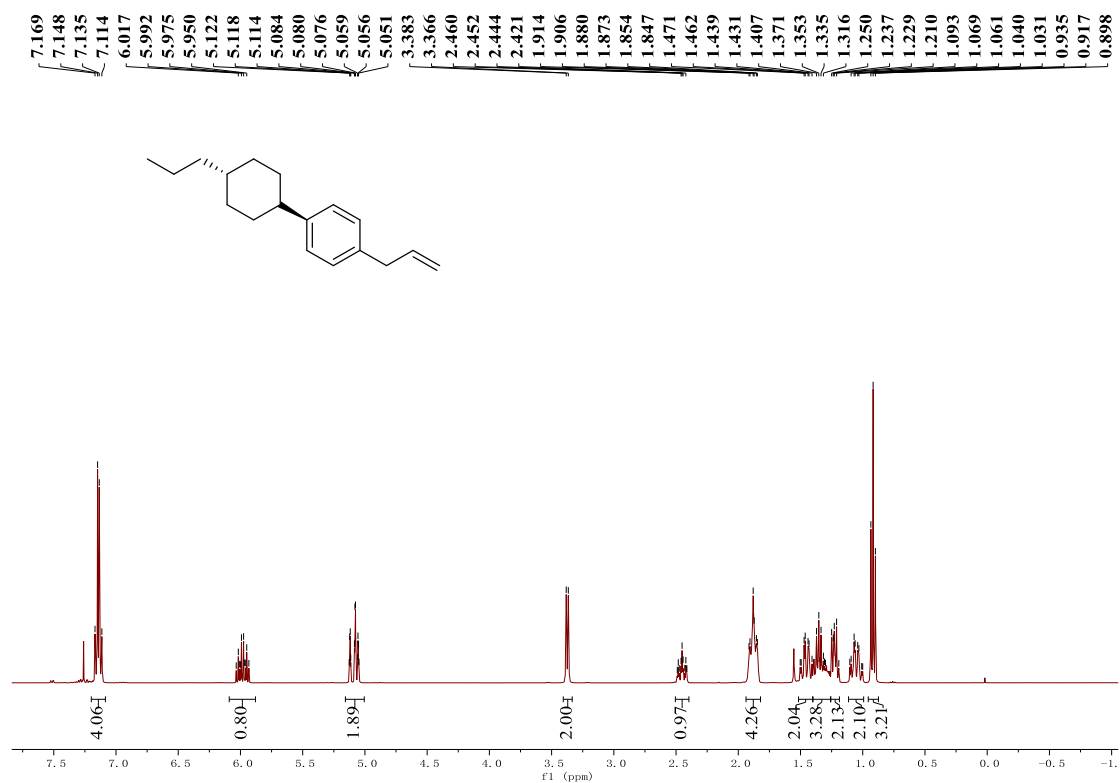

<sup>1</sup>H NMR of Compound **1x** (400 MHz, CDCl<sub>3</sub>)

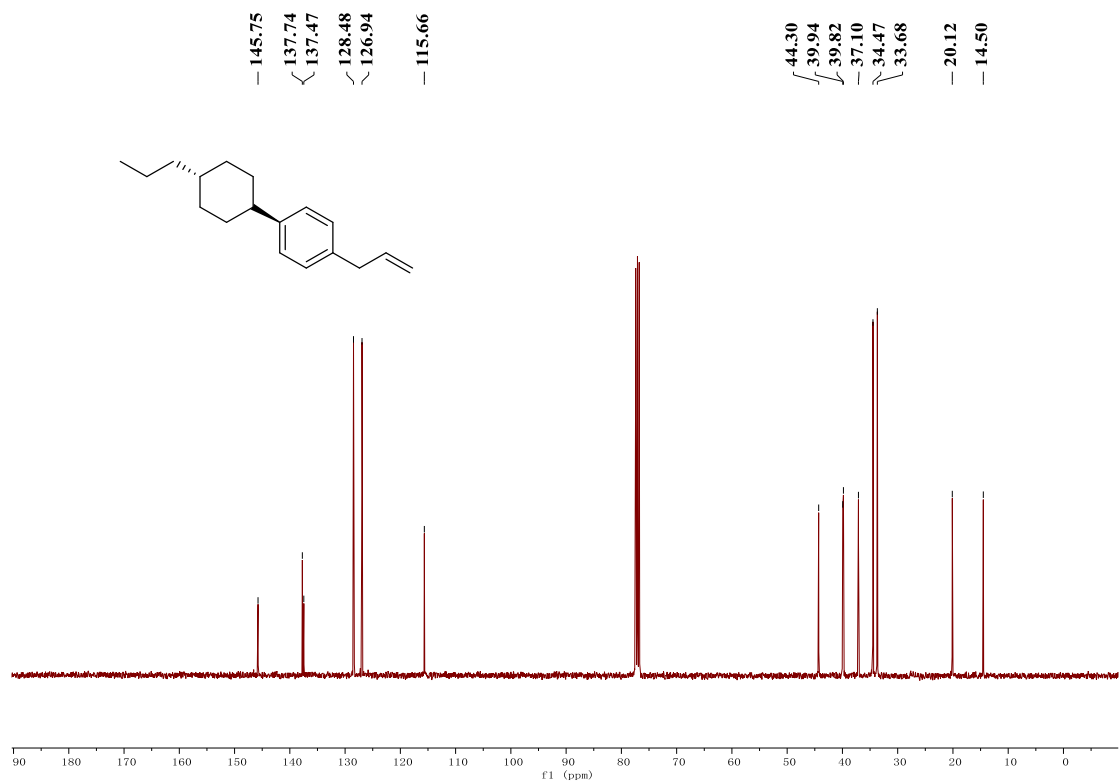

<sup>13</sup>C NMR of Compound **1x** (101 MHz, CDCl<sub>3</sub>)



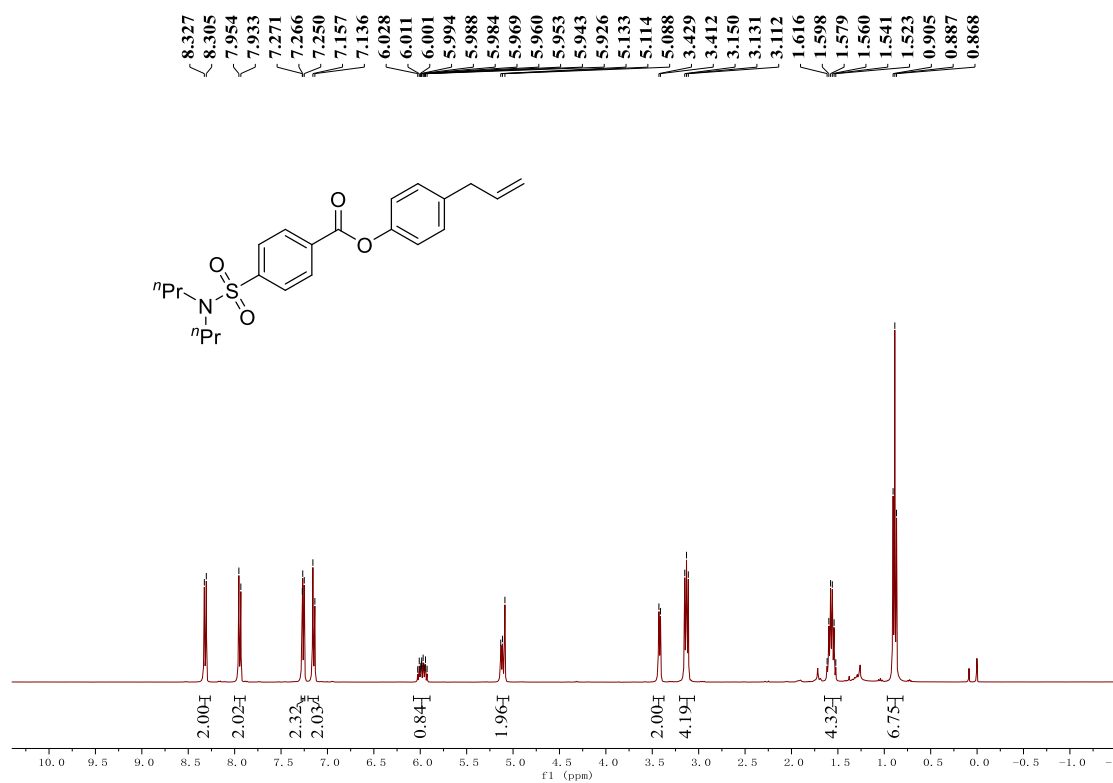

<sup>1</sup>H NMR of Compound **1a** (400 MHz, CDCl<sub>3</sub>)

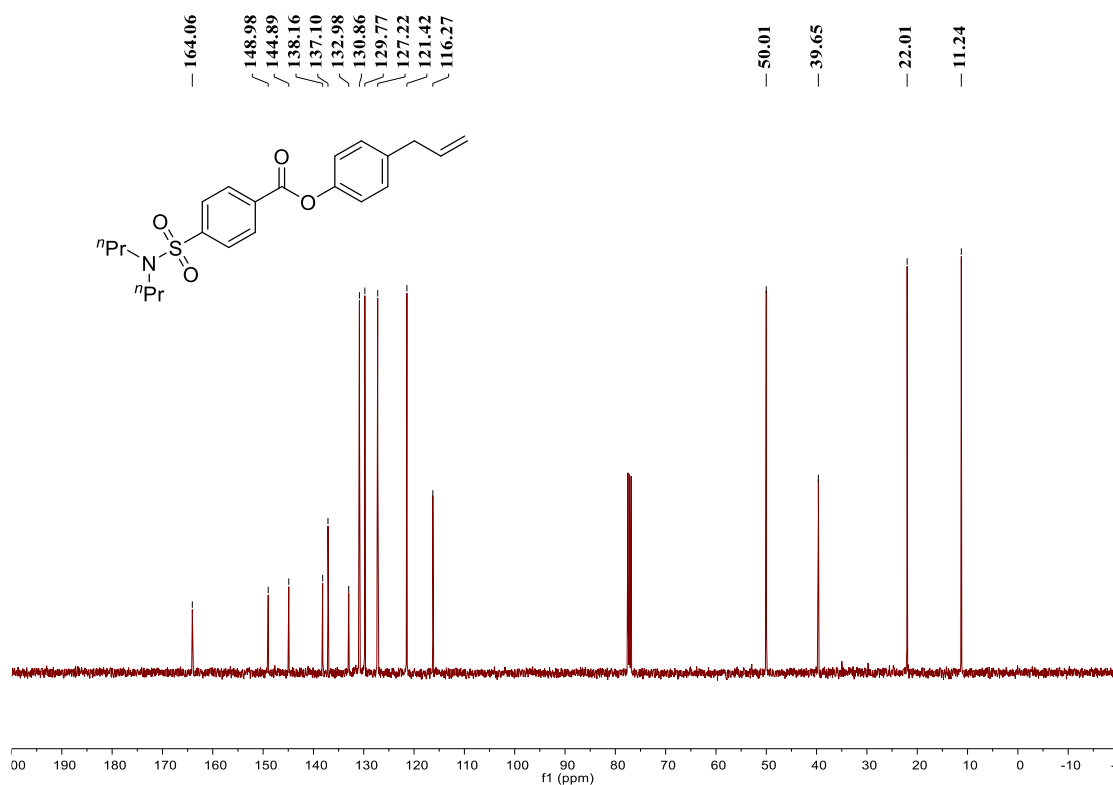

<sup>13</sup>C NMR of Compound **1a** (101 MHz, CDCl<sub>3</sub>)

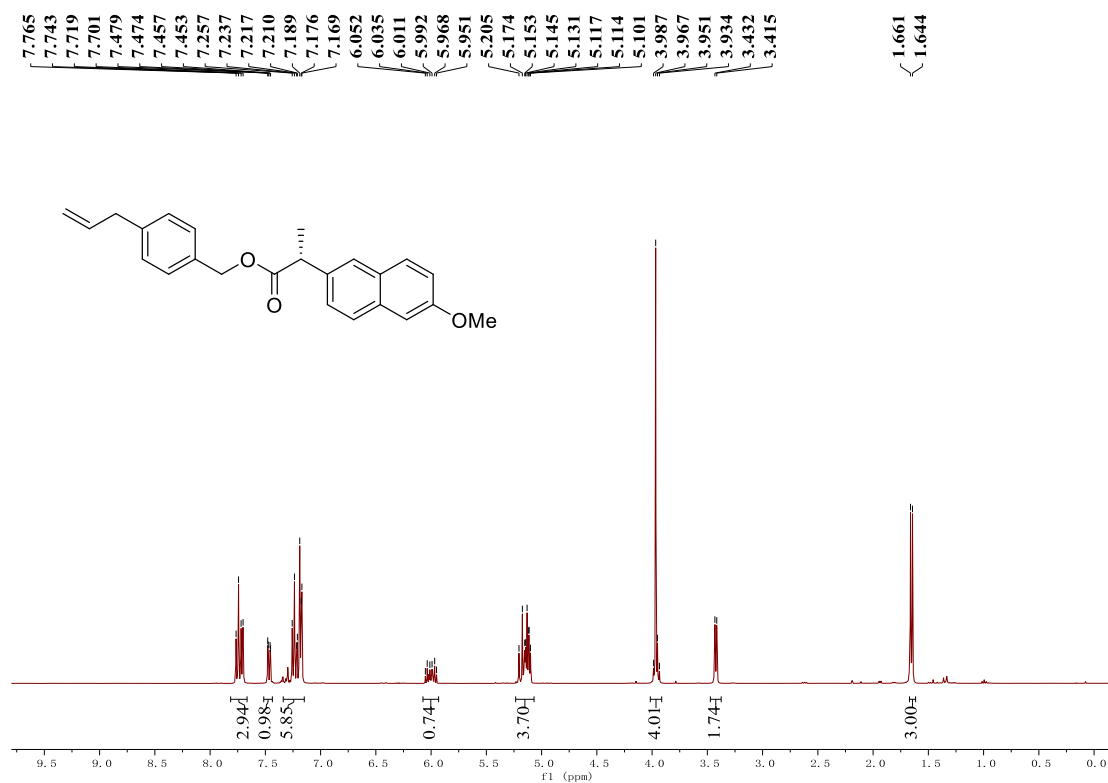

<sup>1</sup>H NMR of Compound **1b** (400 MHz, CDCl<sub>3</sub>)

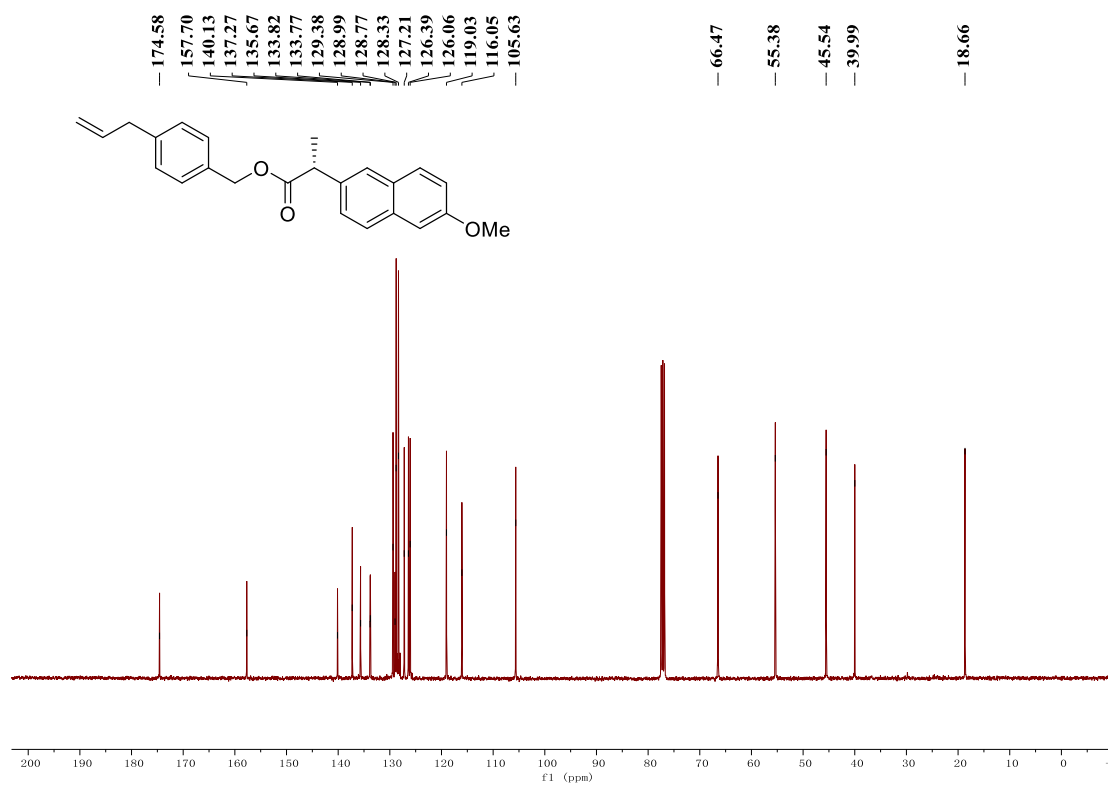

<sup>13</sup>C NMR of Compound **1b** (101 MHz, CDCl<sub>3</sub>)

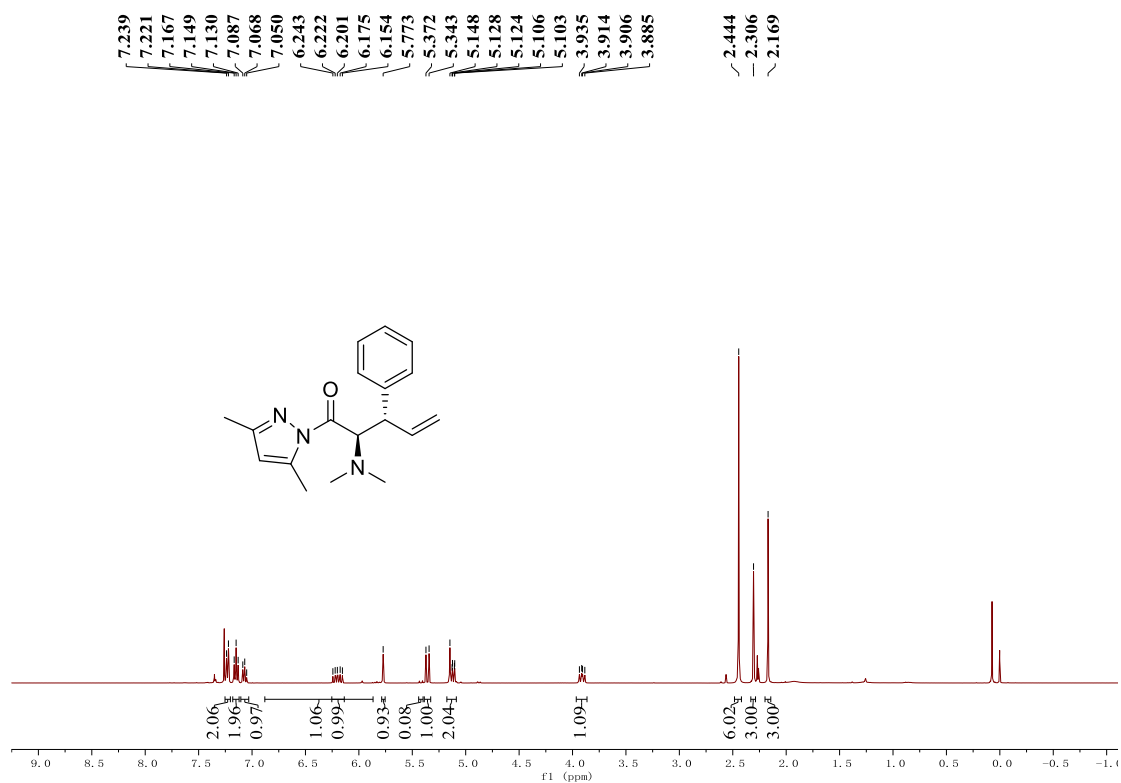

<sup>1</sup>H NMR of Compound **3a** (400 MHz, CDCl<sub>3</sub>)

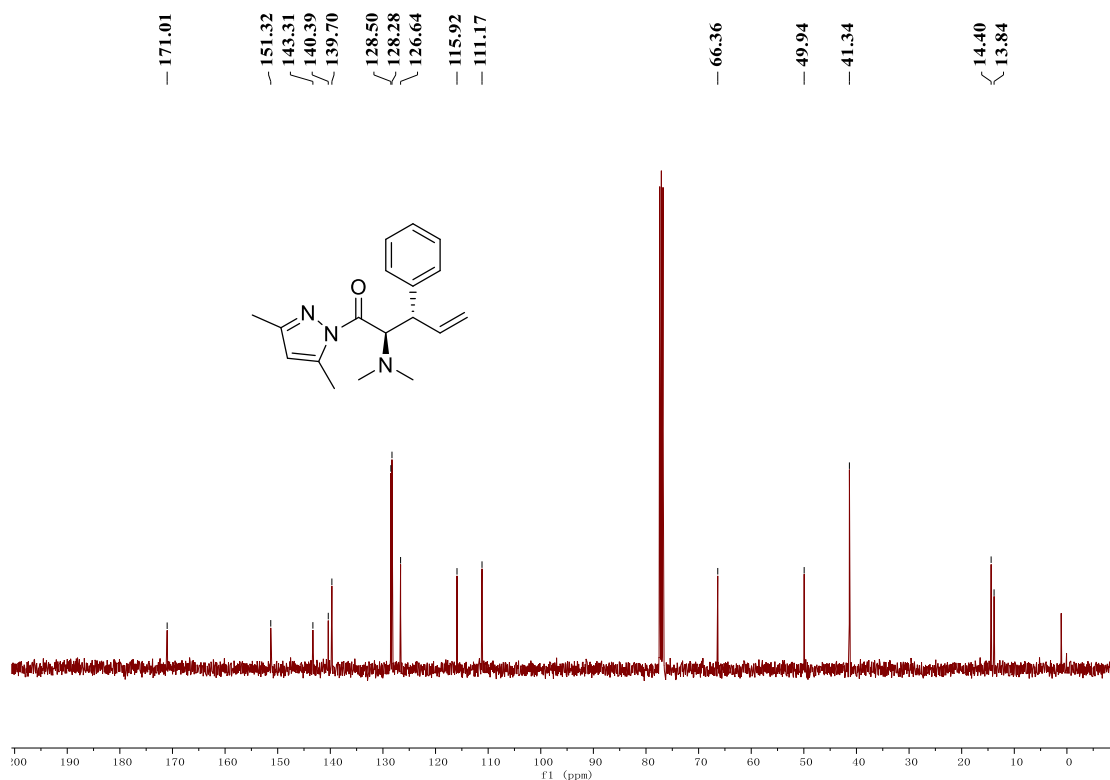

<sup>13</sup>C NMR of Compound **3a** (101 MHz, CDCl<sub>3</sub>)

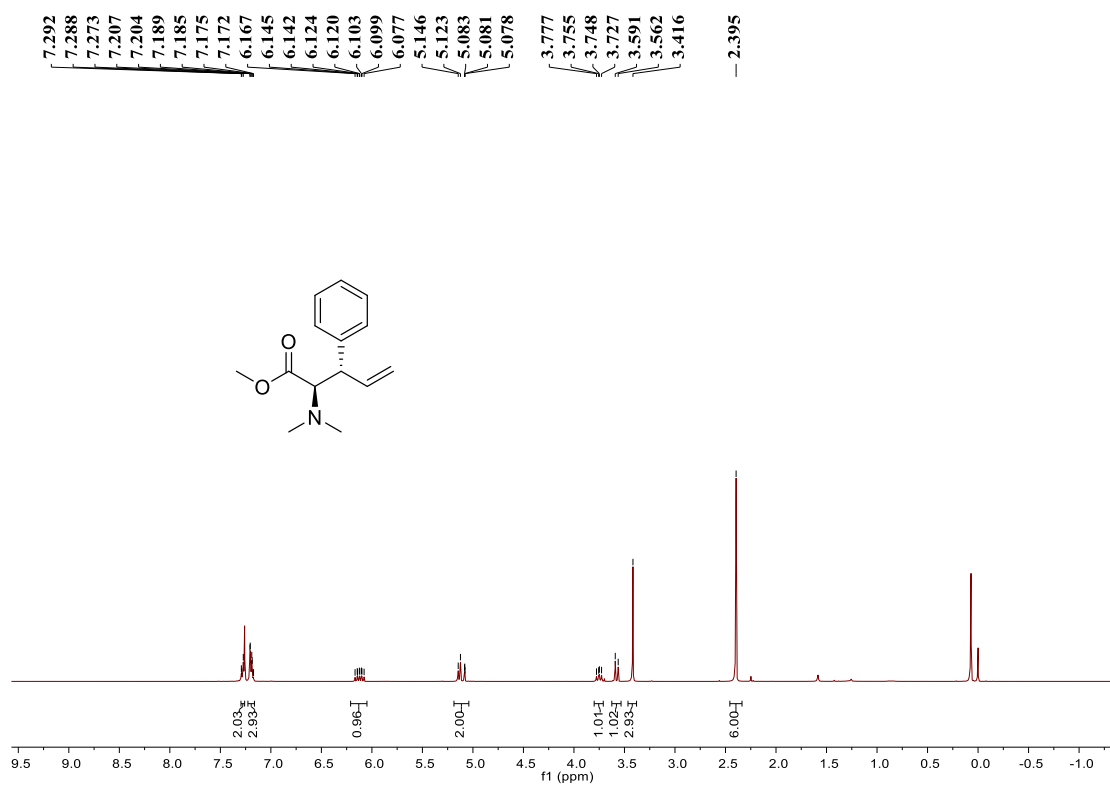

<sup>1</sup>H NMR of Compound **3a-methyl ester** (400 MHz, CDCl<sub>3</sub>)

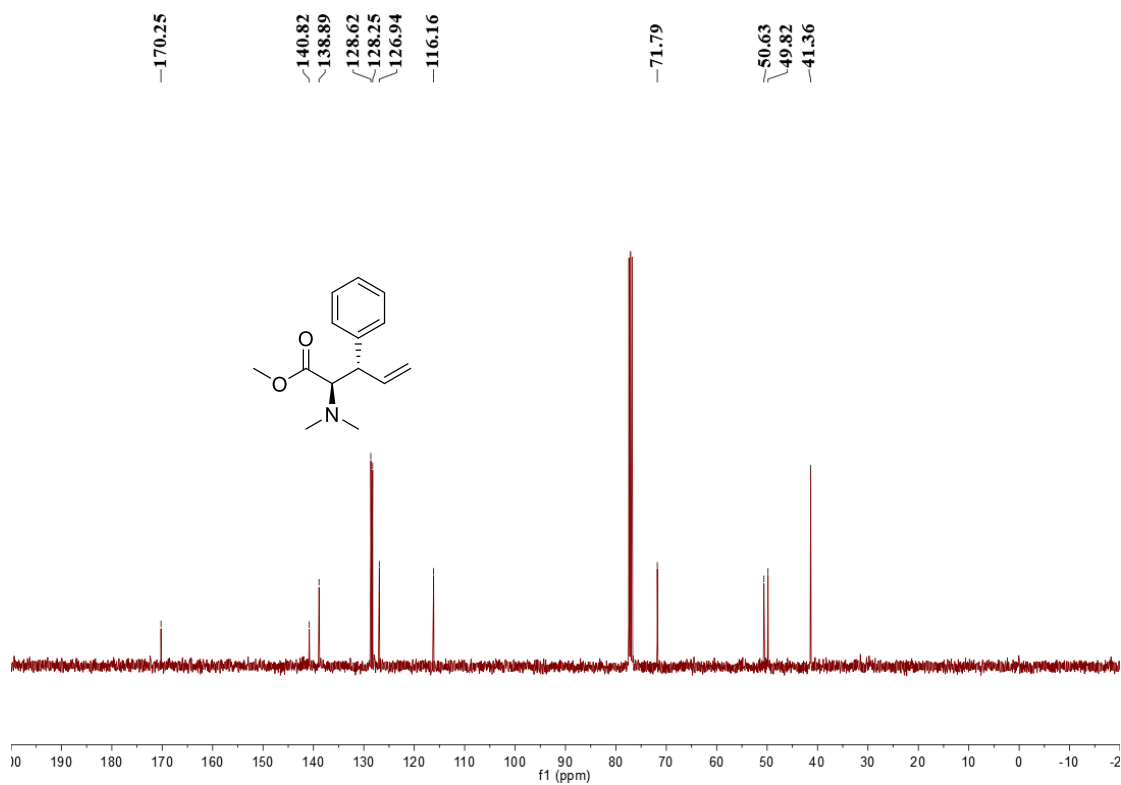

<sup>13</sup>C NMR of Compound **3a-methyl ester** (101 MHz, CDCl<sub>3</sub>)

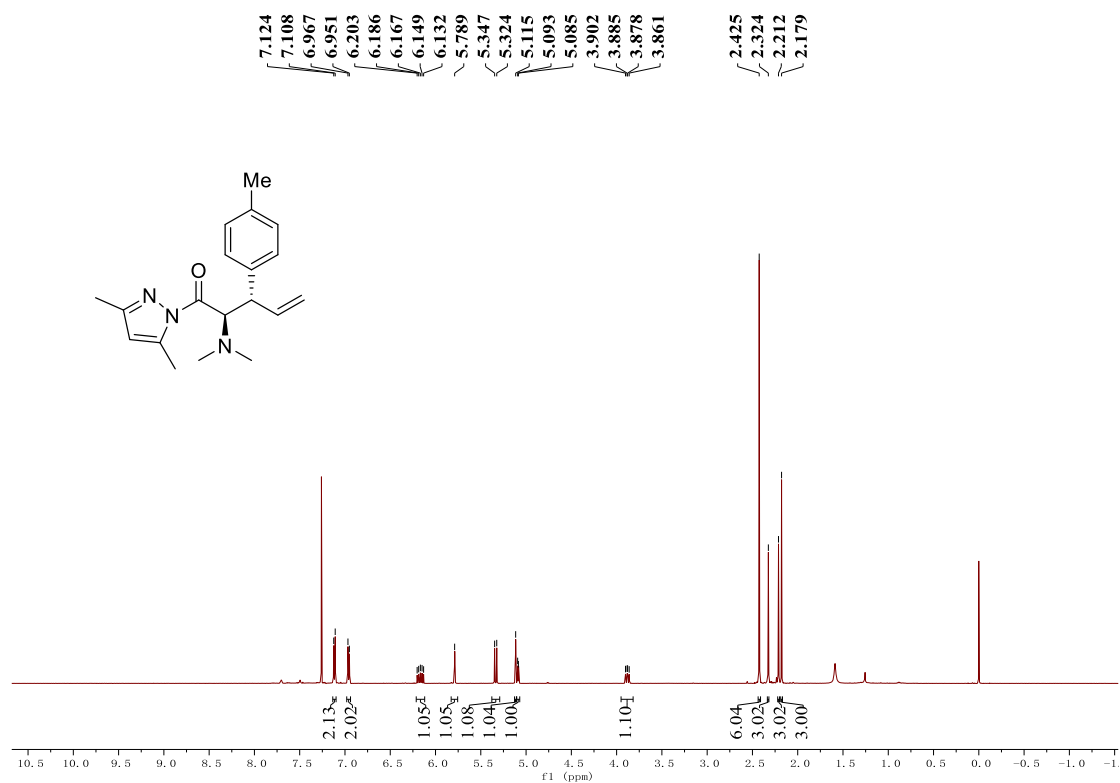

<sup>1</sup>H NMR of Compound **3b** ((500 MHz, CDCl<sub>3</sub>))

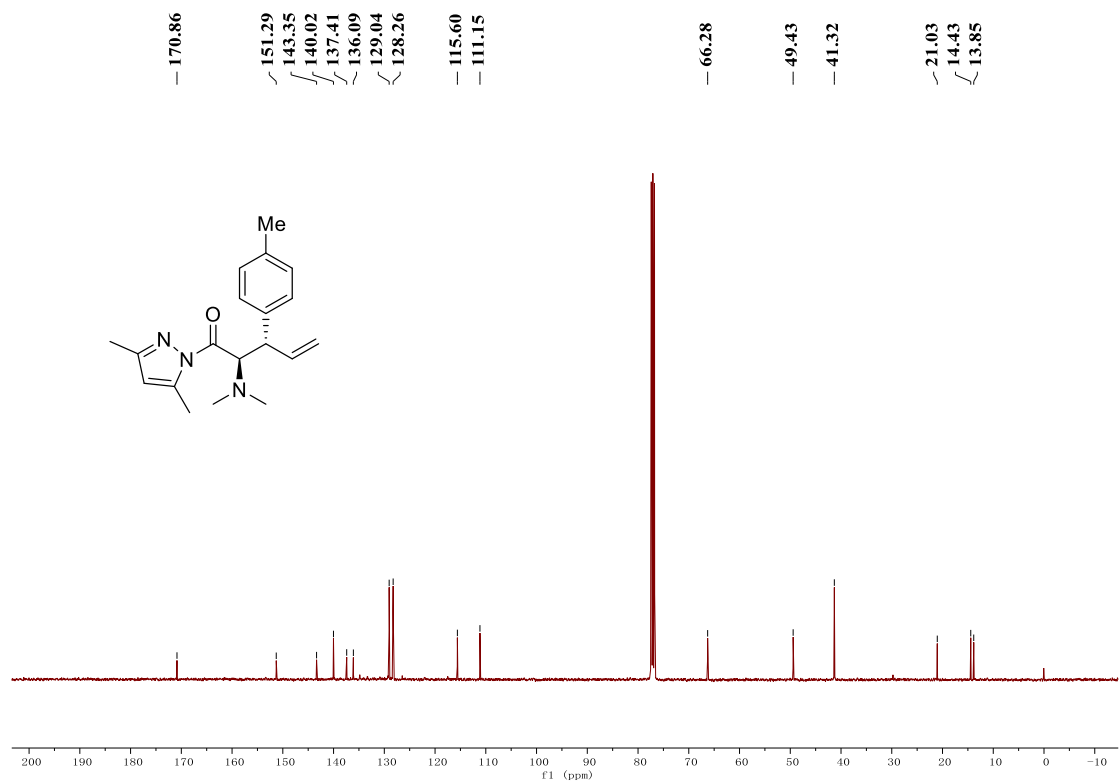

<sup>13</sup>C NMR of Compound **3b** (101 MHz, CDCl<sub>3</sub>)

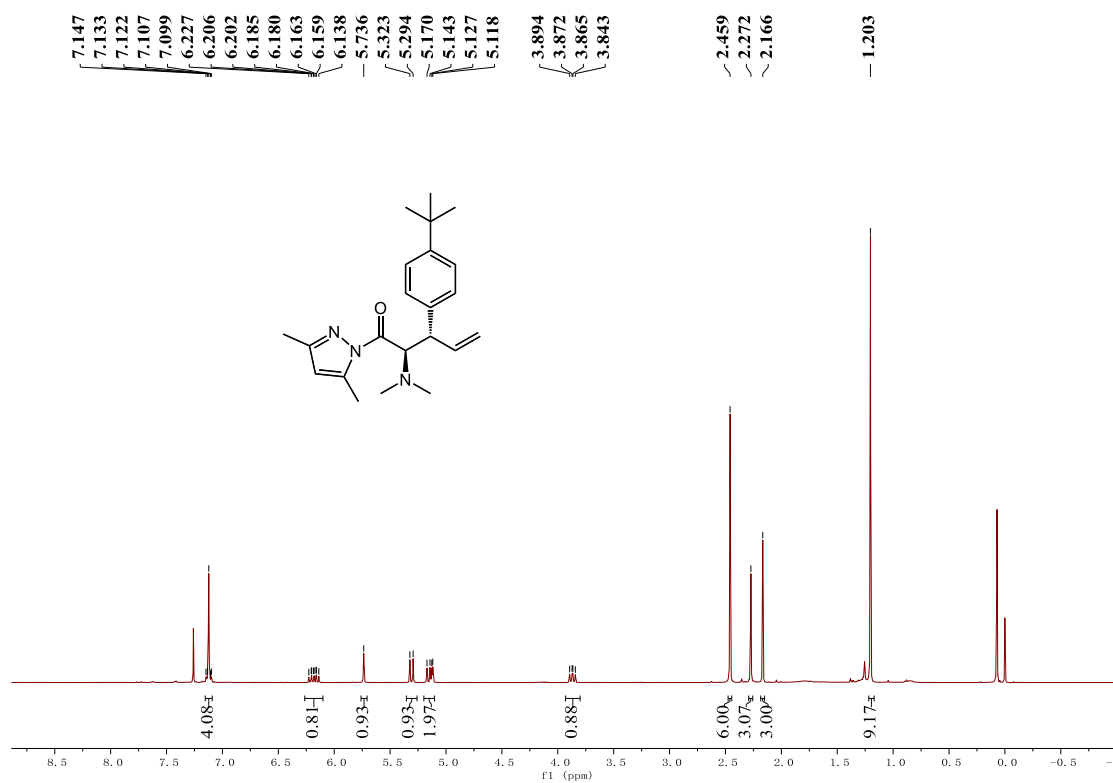

**<sup>1</sup>H NMR of Compound 3c (400 MHz, CDCl<sub>3</sub>)**

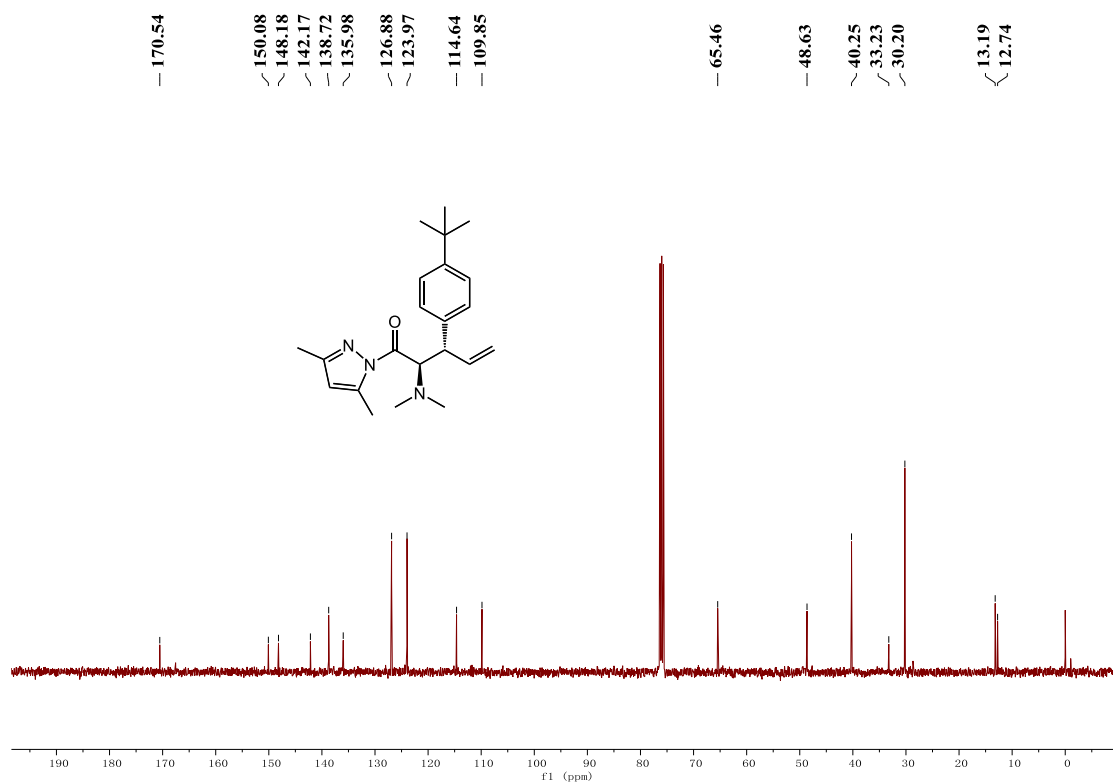

**<sup>13</sup>C NMR of Compound 3c (101 MHz, CDCl<sub>3</sub>)**

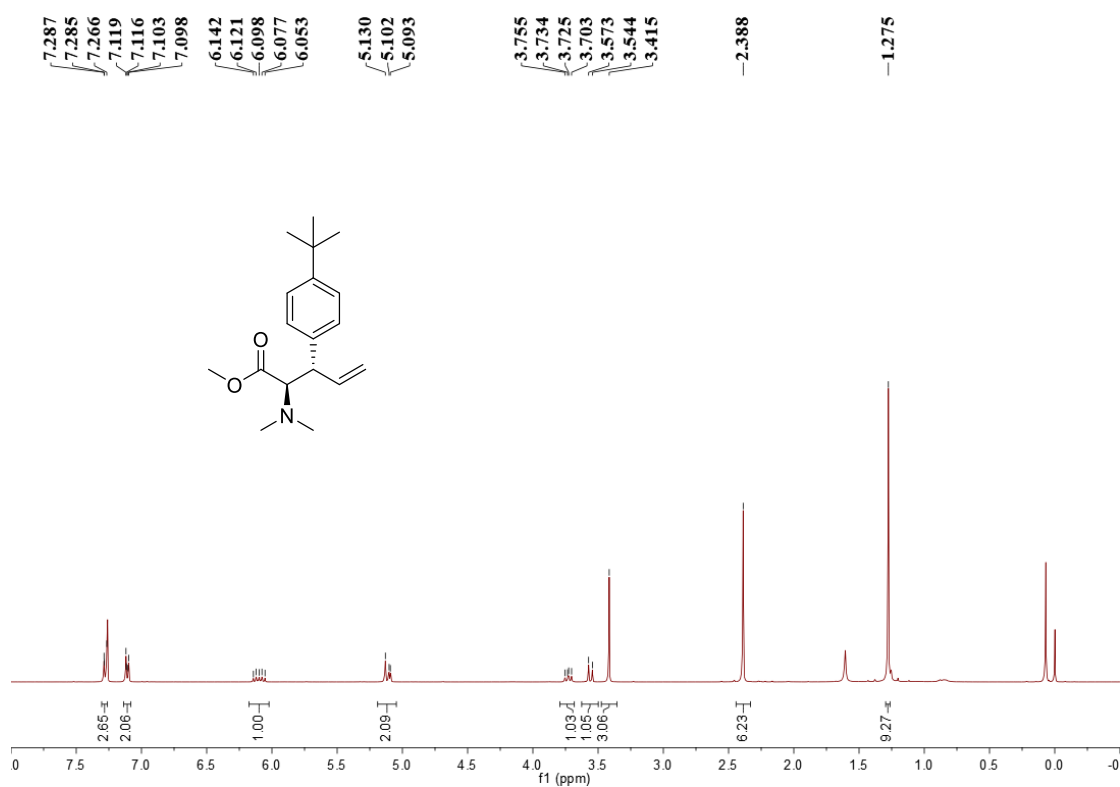

<sup>1</sup>H NMR of Compound 3c-methyl ester (400 MHz, CDCl<sub>3</sub>)

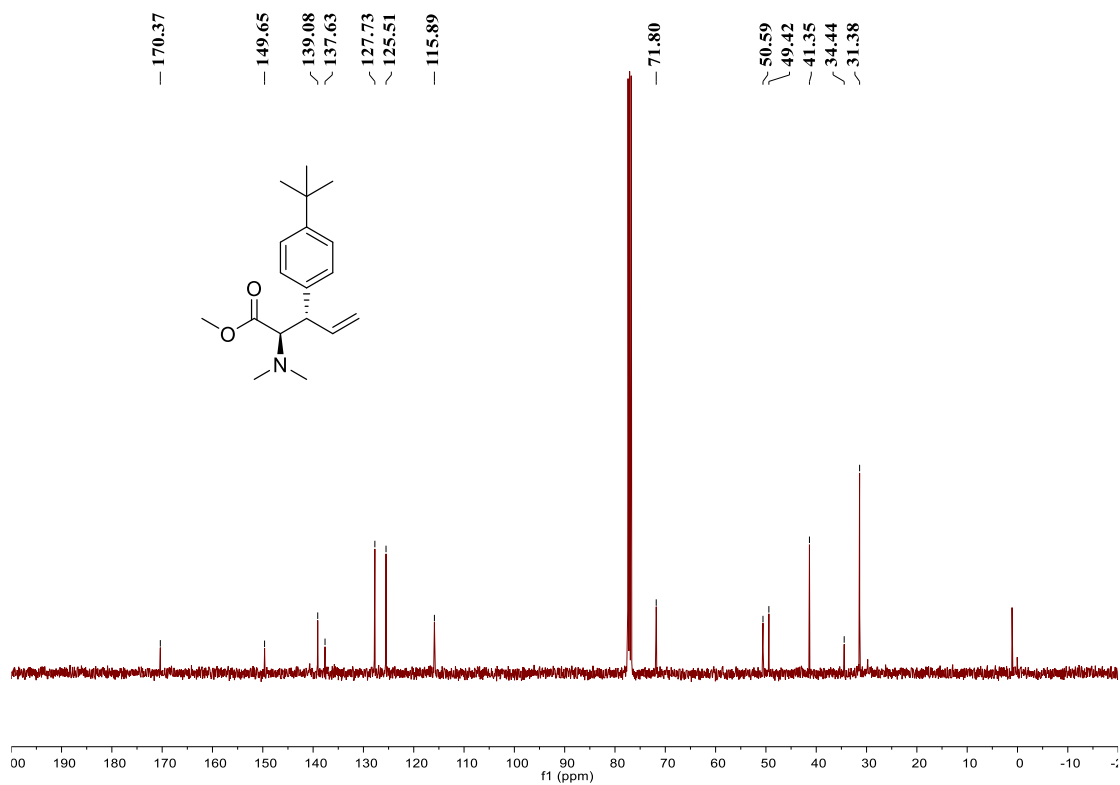

<sup>13</sup>C NMR of Compound 3c-methyl ester (101 MHz, CDCl<sub>3</sub>)

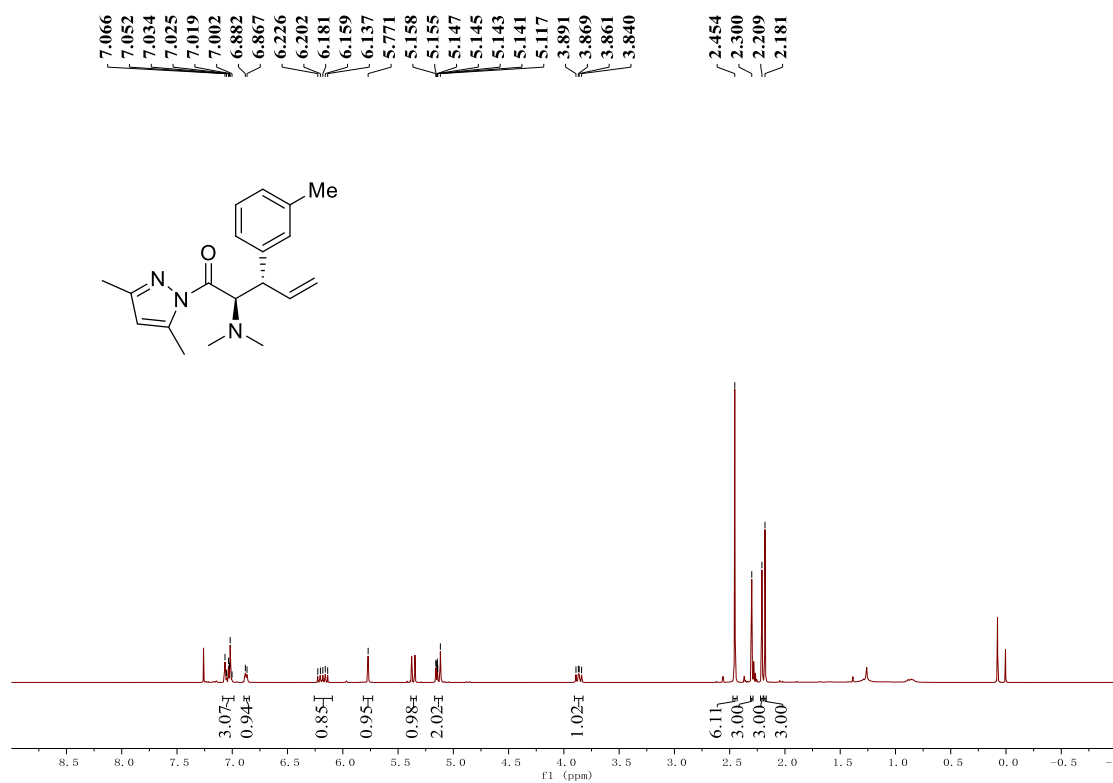

<sup>1</sup>H NMR of Compound **3d** (400 MHz, CDCl<sub>3</sub>)

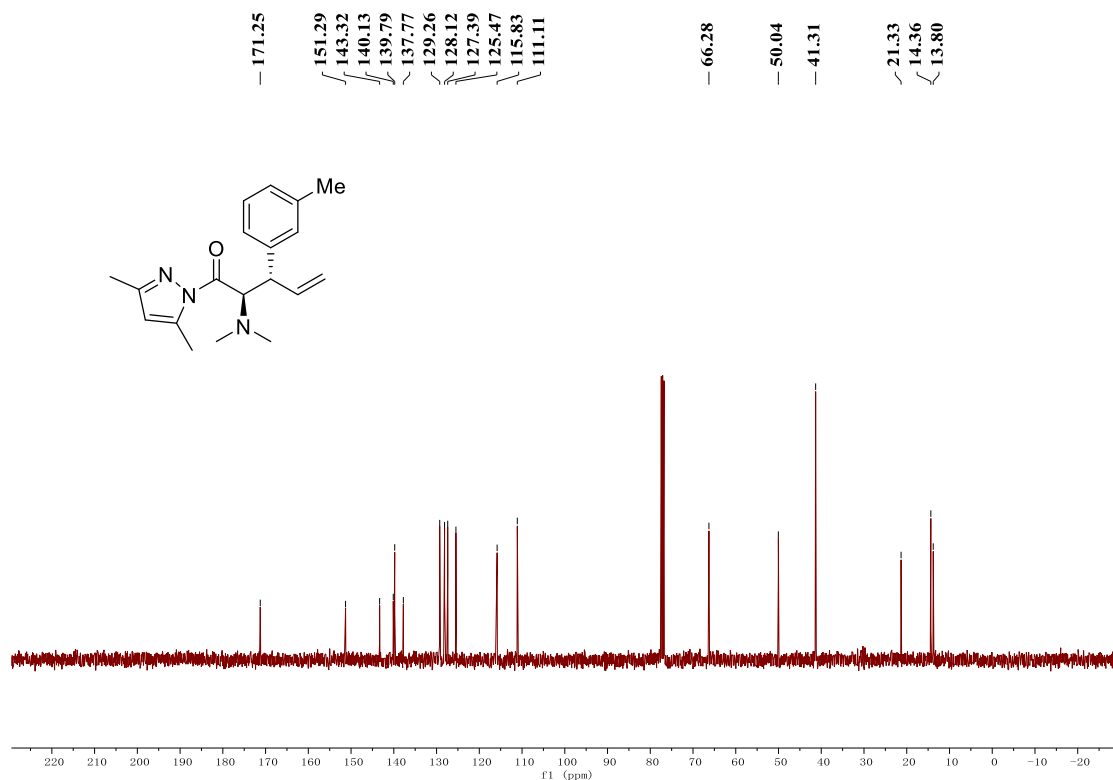

<sup>13</sup>C NMR of Compound **3d** (101 MHz, CDCl<sub>3</sub>)



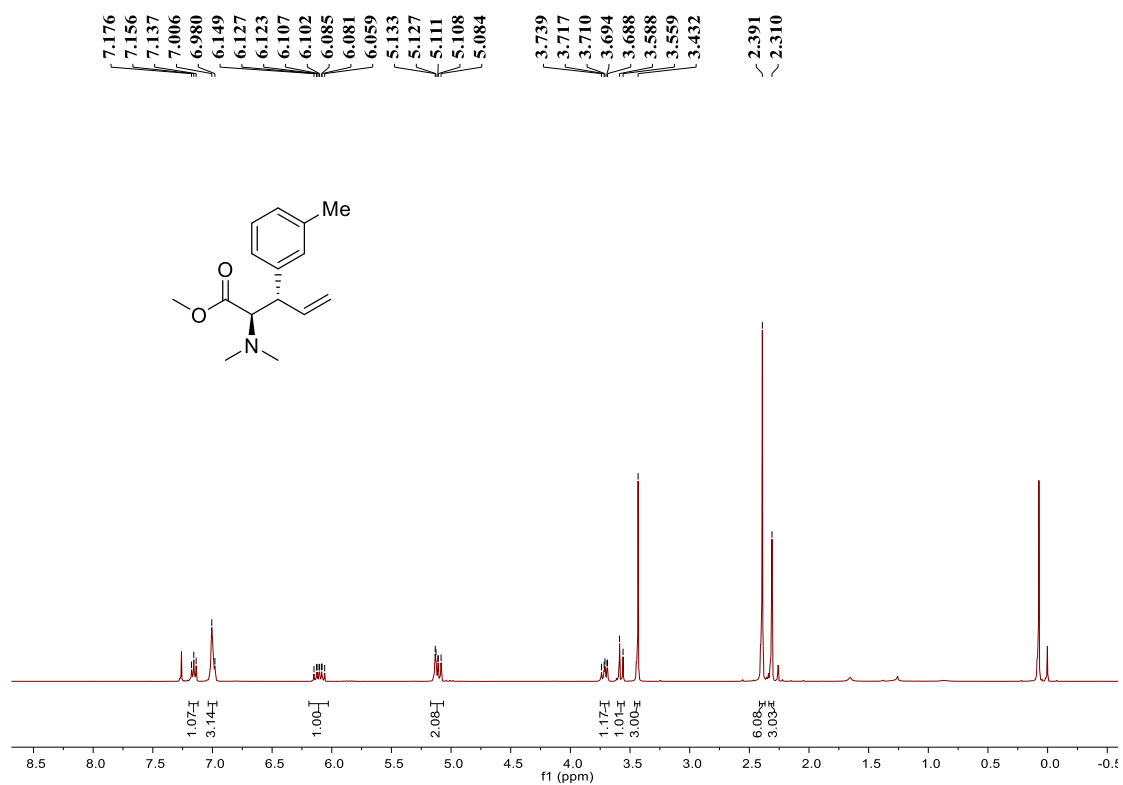

<sup>1</sup>H NMR of Compound 3d-methyl ester (400 MHz, CDCl<sub>3</sub>)

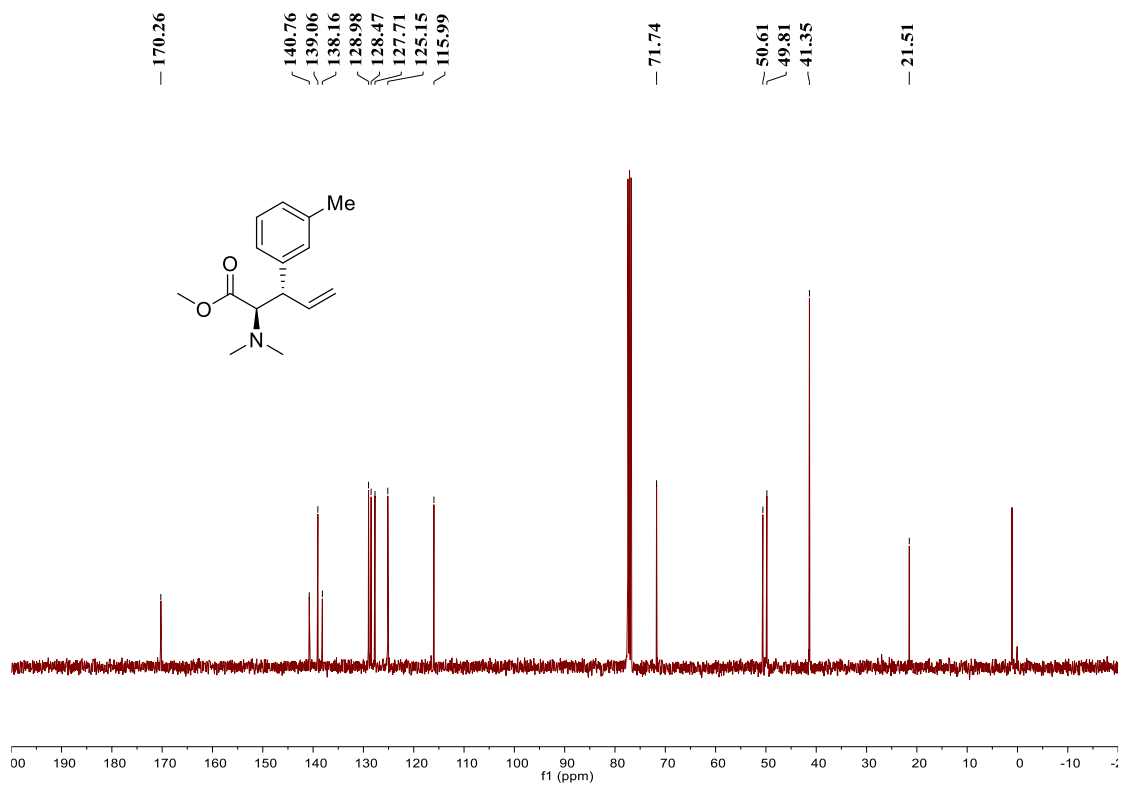

<sup>13</sup>C NMR of Compound 3d-methyl ester (101 MHz, CDCl<sub>3</sub>)

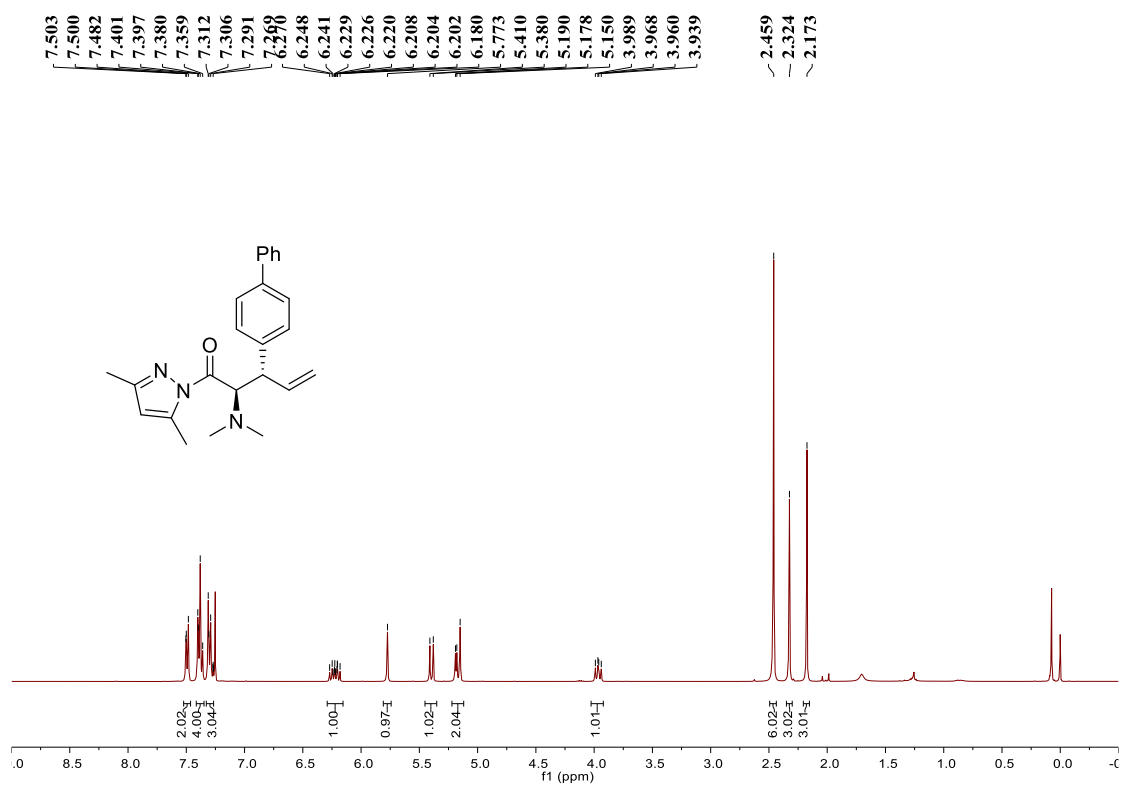

<sup>1</sup>H NMR of Compound 3e (400 MHz, CDCl<sub>3</sub>)

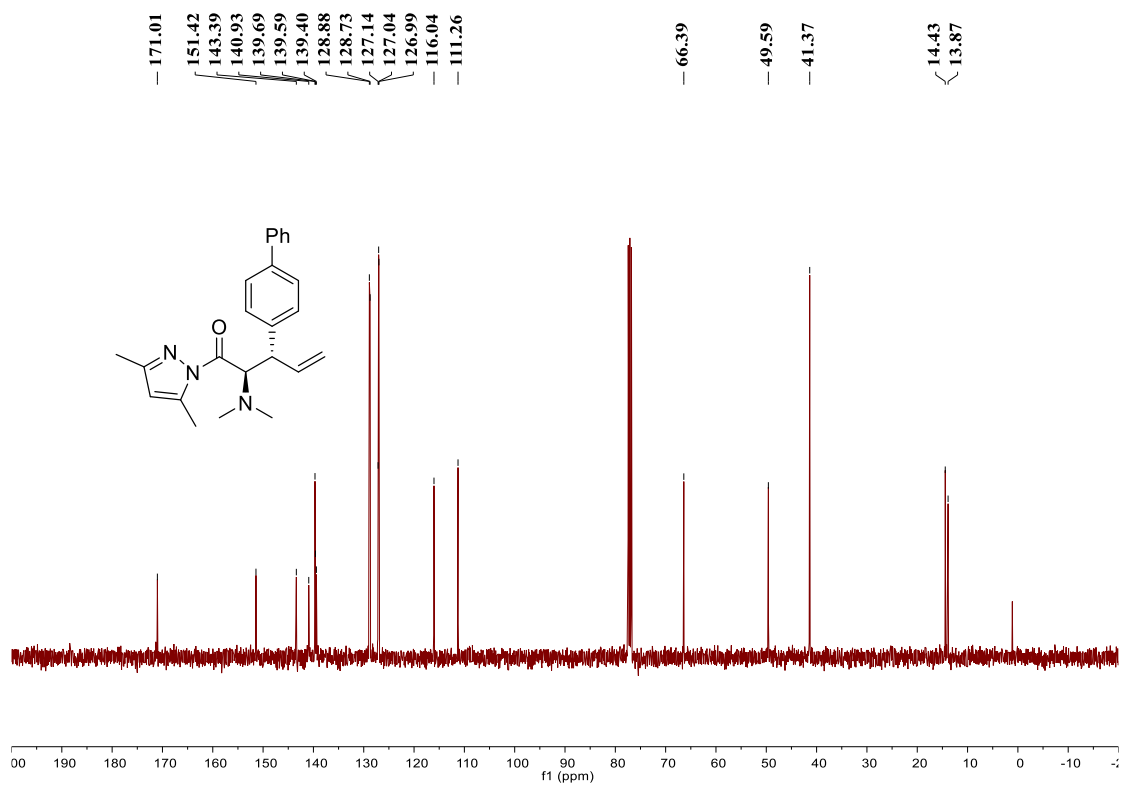

<sup>13</sup>C NMR of Compound 3e (101 MHz, CDCl<sub>3</sub>)

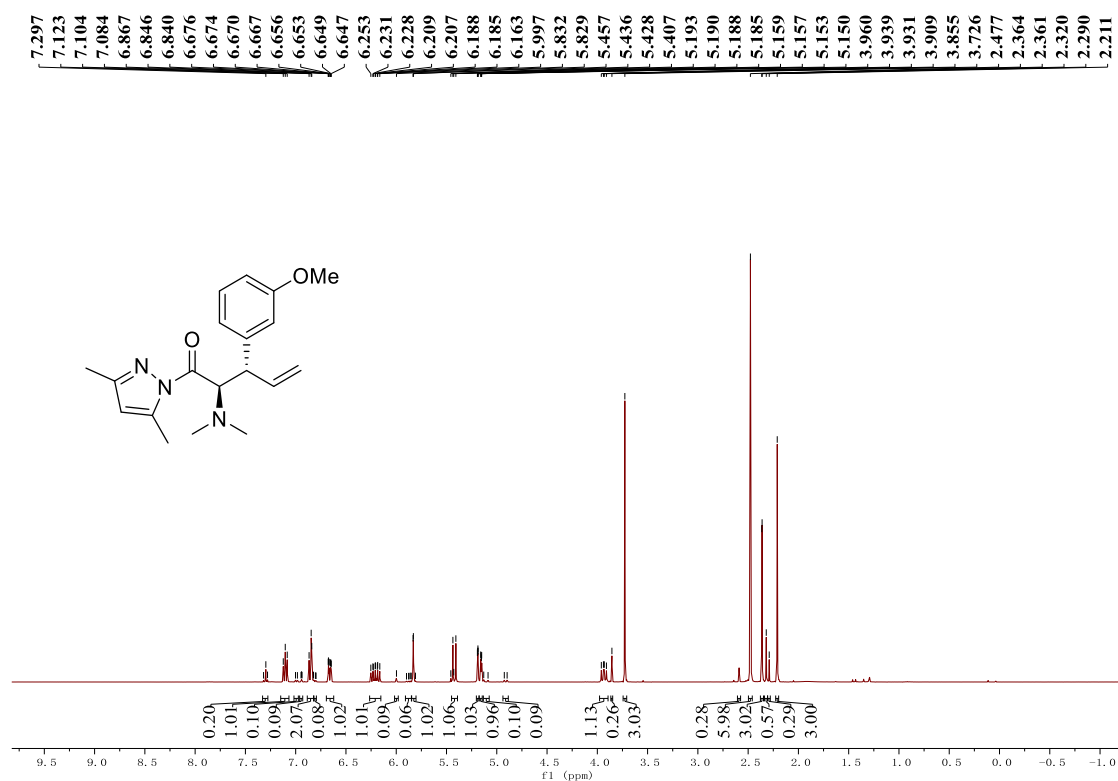

**<sup>1</sup>H NMR of Compound 3f (400 MHz, CDCl<sub>3</sub>)**

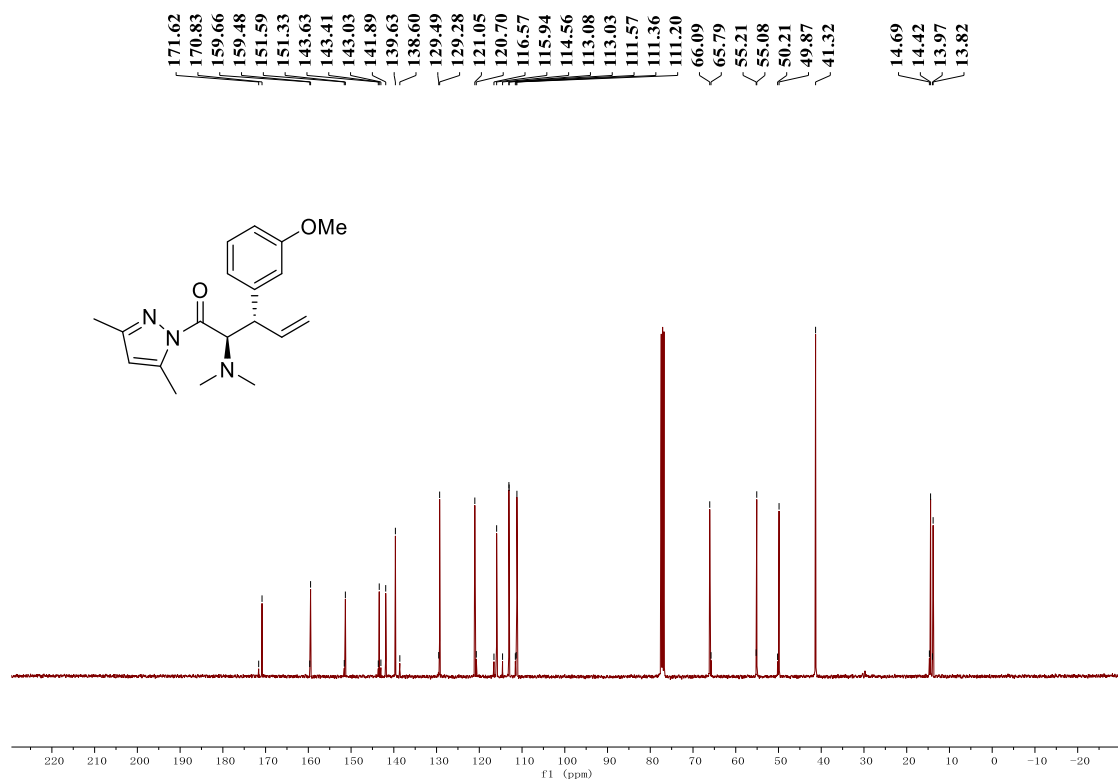

**<sup>13</sup>C NMR of Compound 3f (101 MHz, CDCl<sub>3</sub>)**

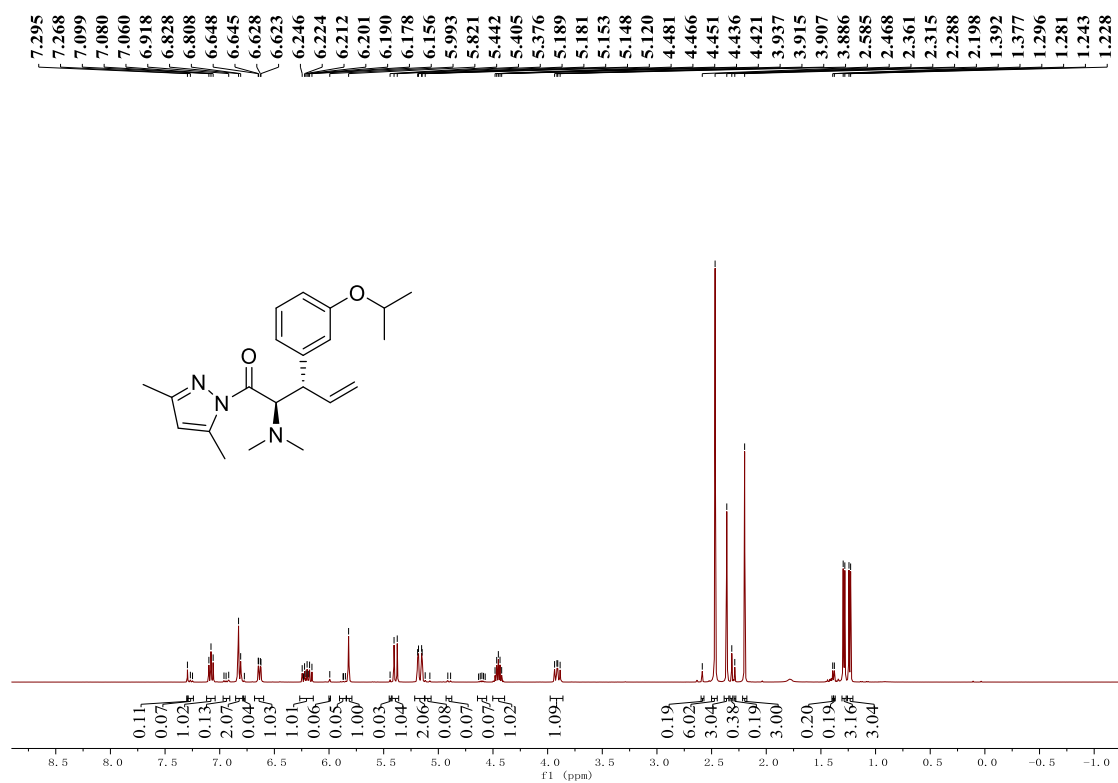

<sup>1</sup>H NMR of Compound 3g (400 MHz, CDCl<sub>3</sub>)

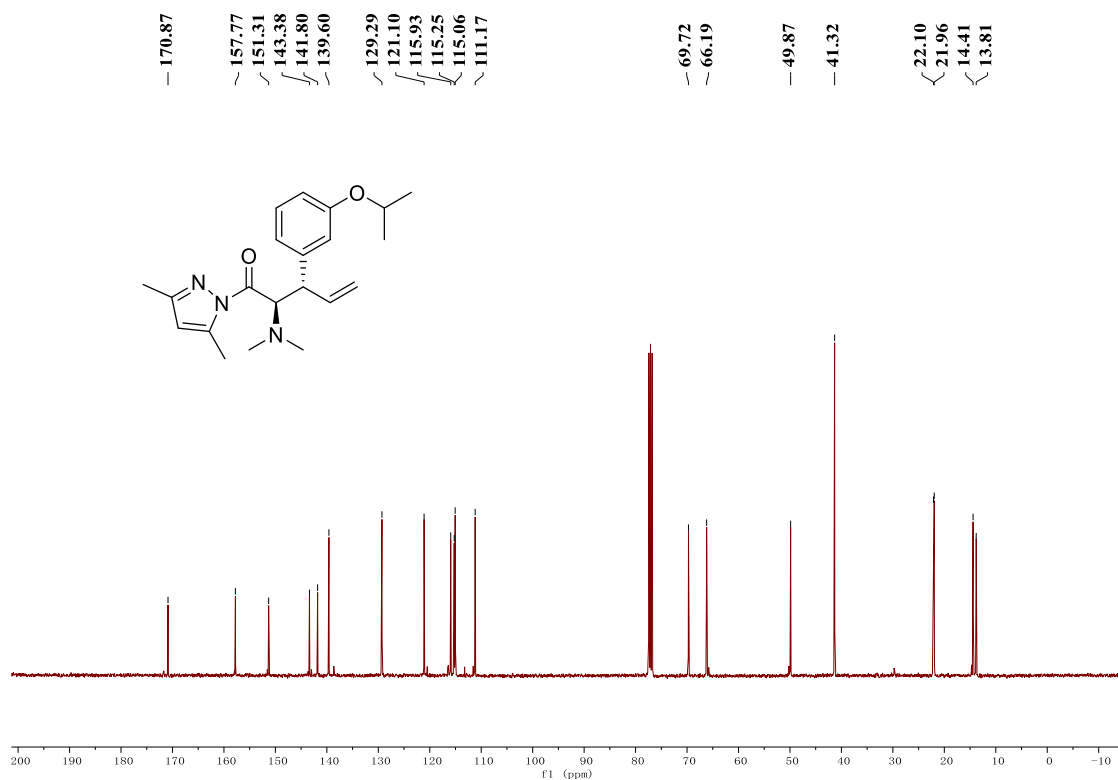

<sup>13</sup>C NMR of Compound 3g (101 MHz, CDCl<sub>3</sub>)

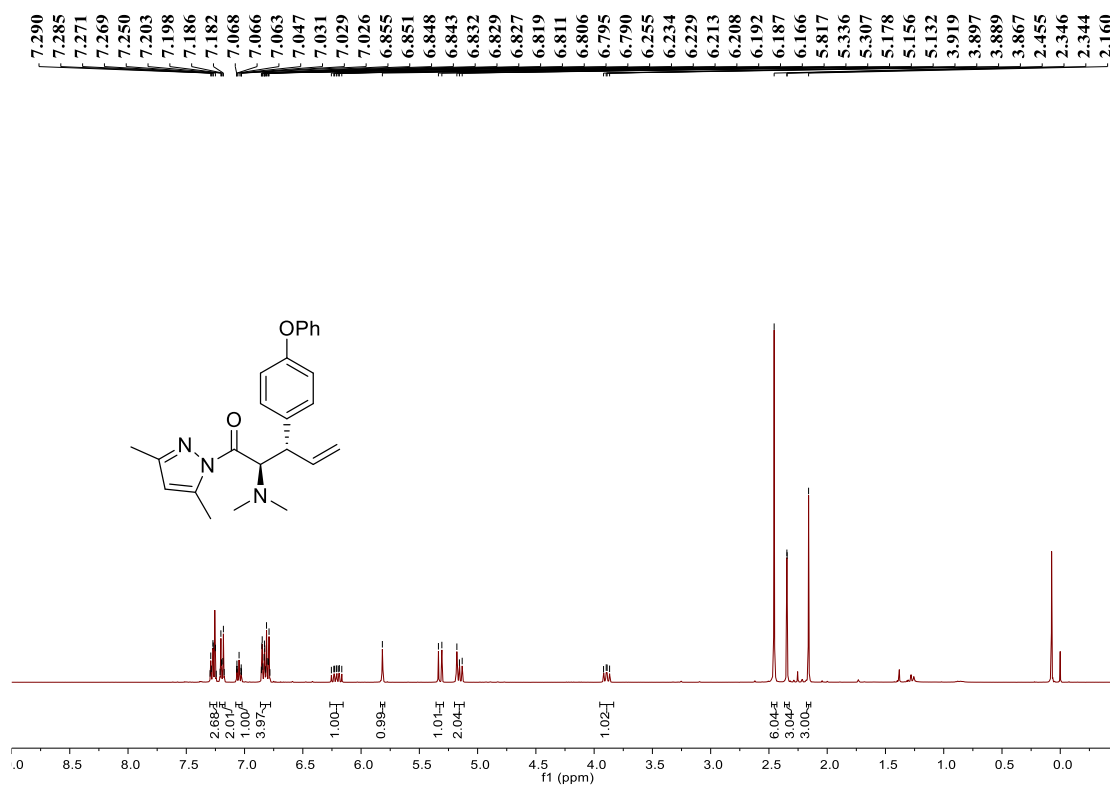

<sup>1</sup>H NMR of Compound **3h** (400 MHz, CDCl<sub>3</sub>)

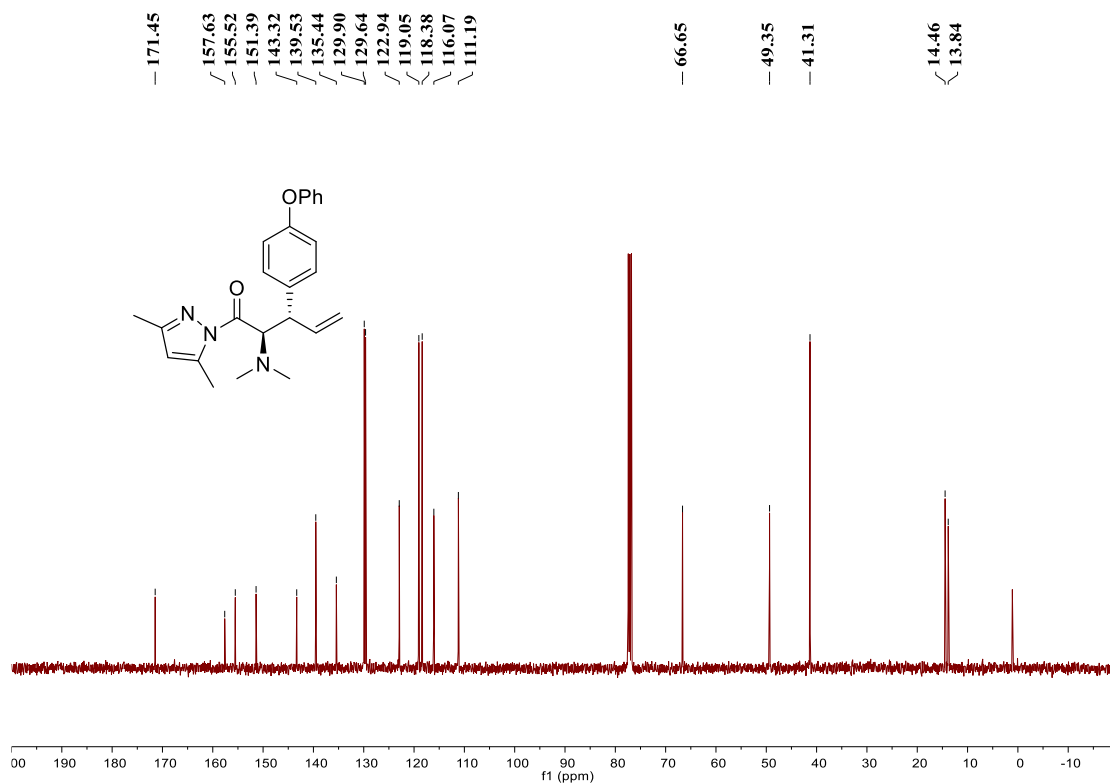

<sup>13</sup>C NMR of Compound **3h** (101 MHz, CDCl<sub>3</sub>)

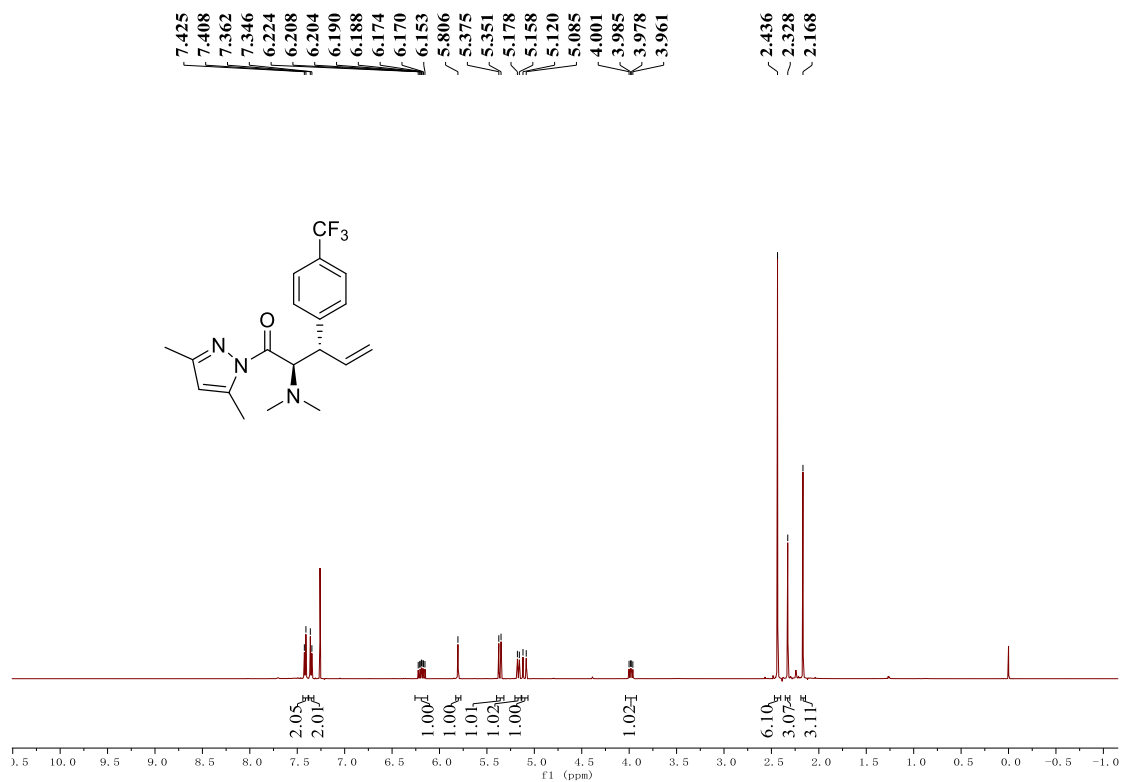

<sup>1</sup>H NMR of Compound 3i (500 MHz, CDCl<sub>3</sub>)

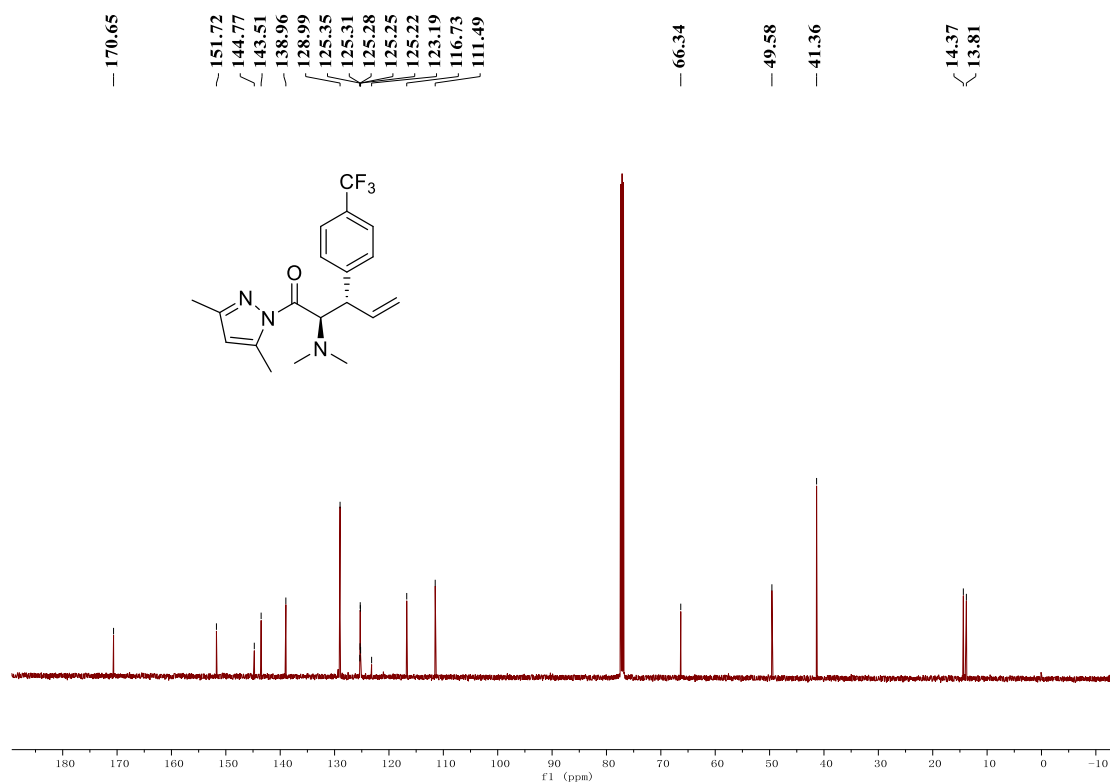

<sup>13</sup>C NMR of Compound 3i (125 MHz, CDCl<sub>3</sub>)

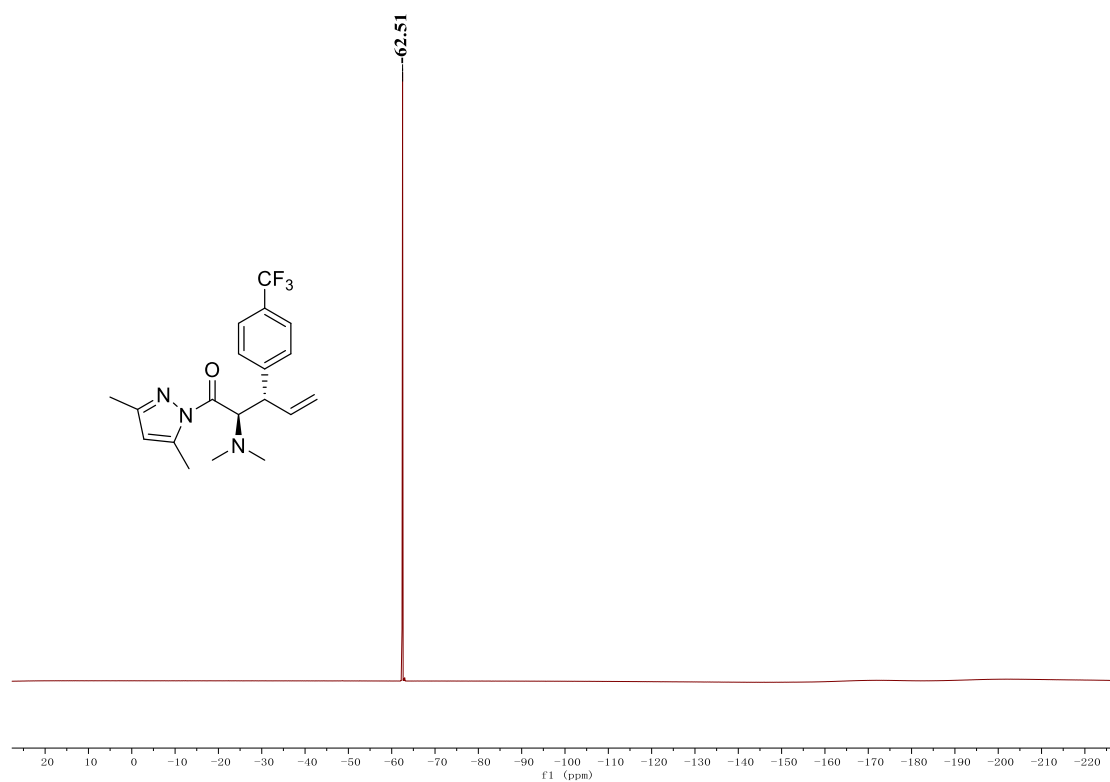

$^{19}\text{F}$  NMR of Compound **3i** (376 MHz,  $\text{CDCl}_3$ )

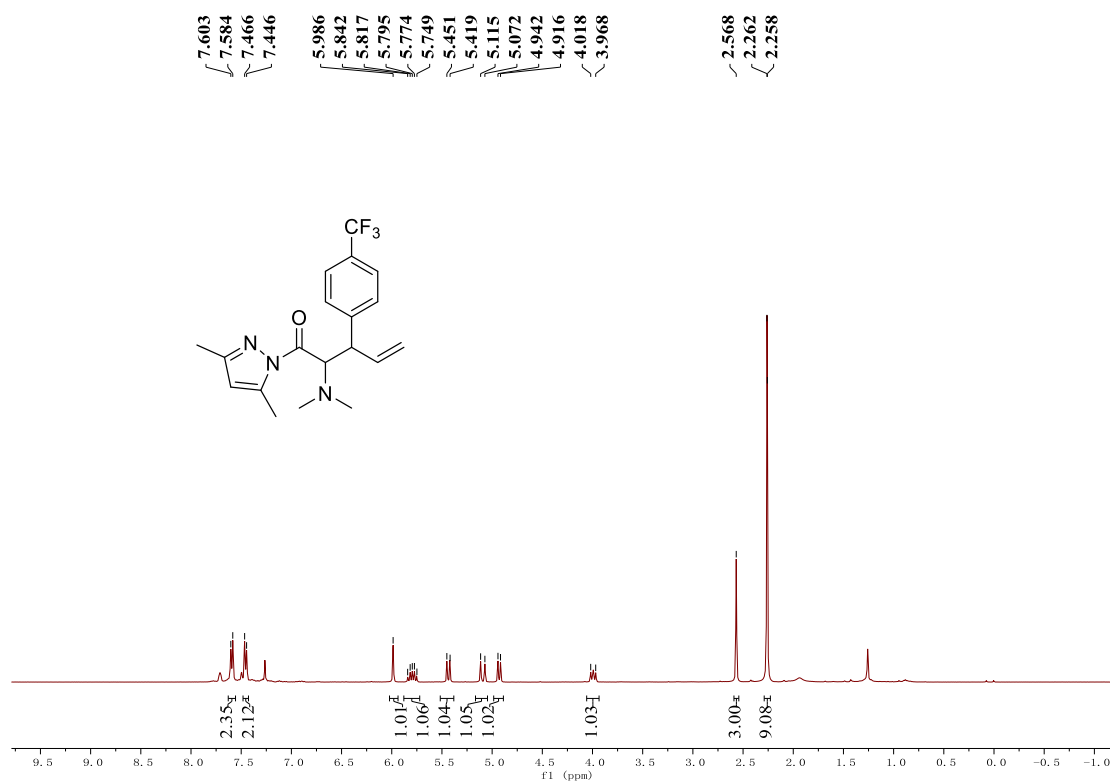

<sup>1</sup>H NMR of Compound **3i-minor** (400 MHz, CDCl<sub>3</sub>)

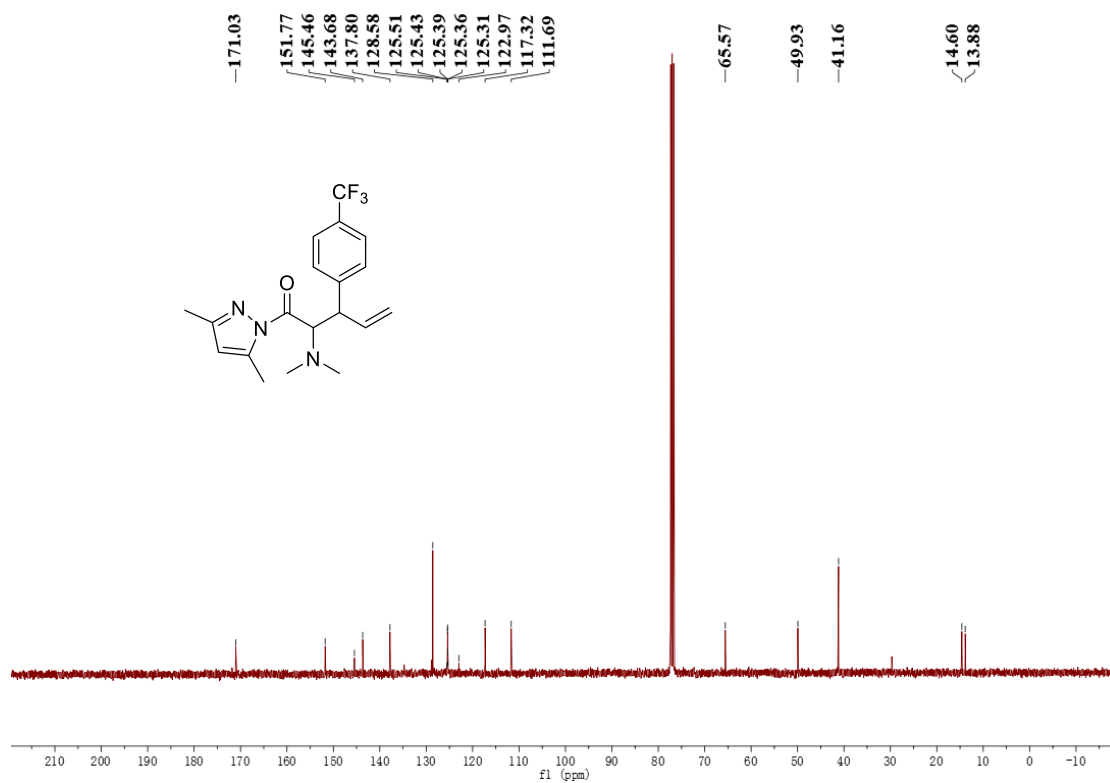

<sup>13</sup>C NMR of Compound **3i-minor** (101 MHz, CDCl<sub>3</sub>)



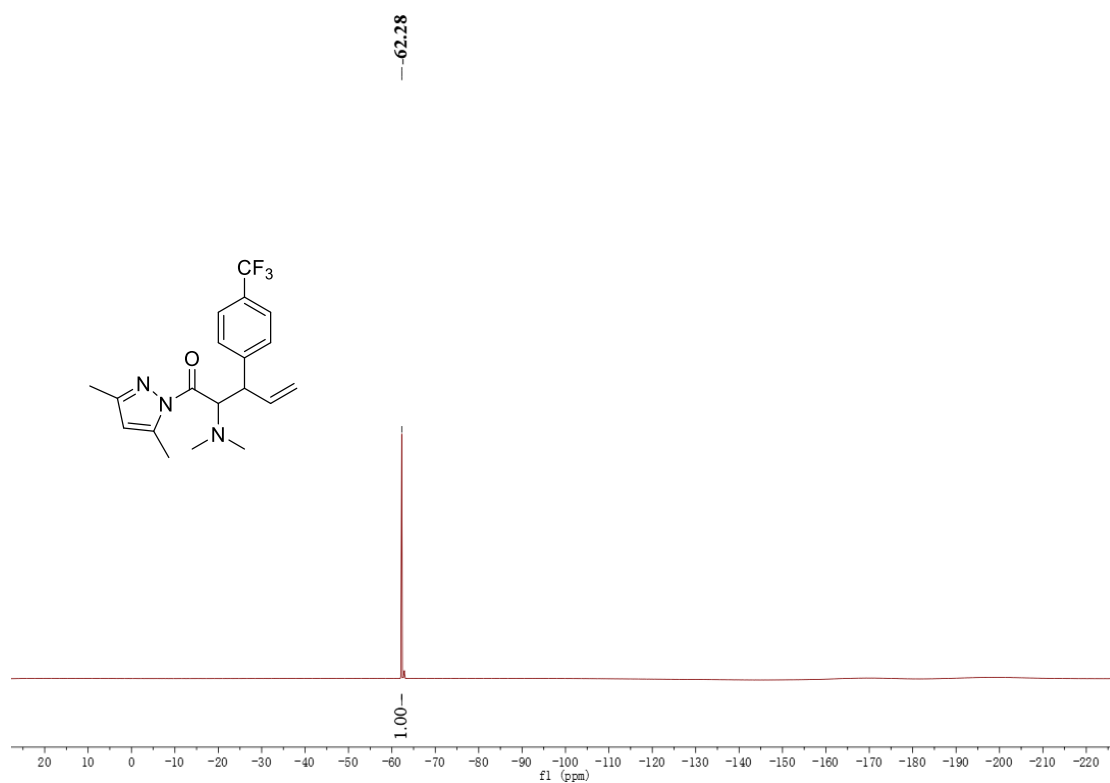

$^{19}\text{F}$  NMR of Compound **3i-minor** (376 MHz,  $\text{CDCl}_3$ )

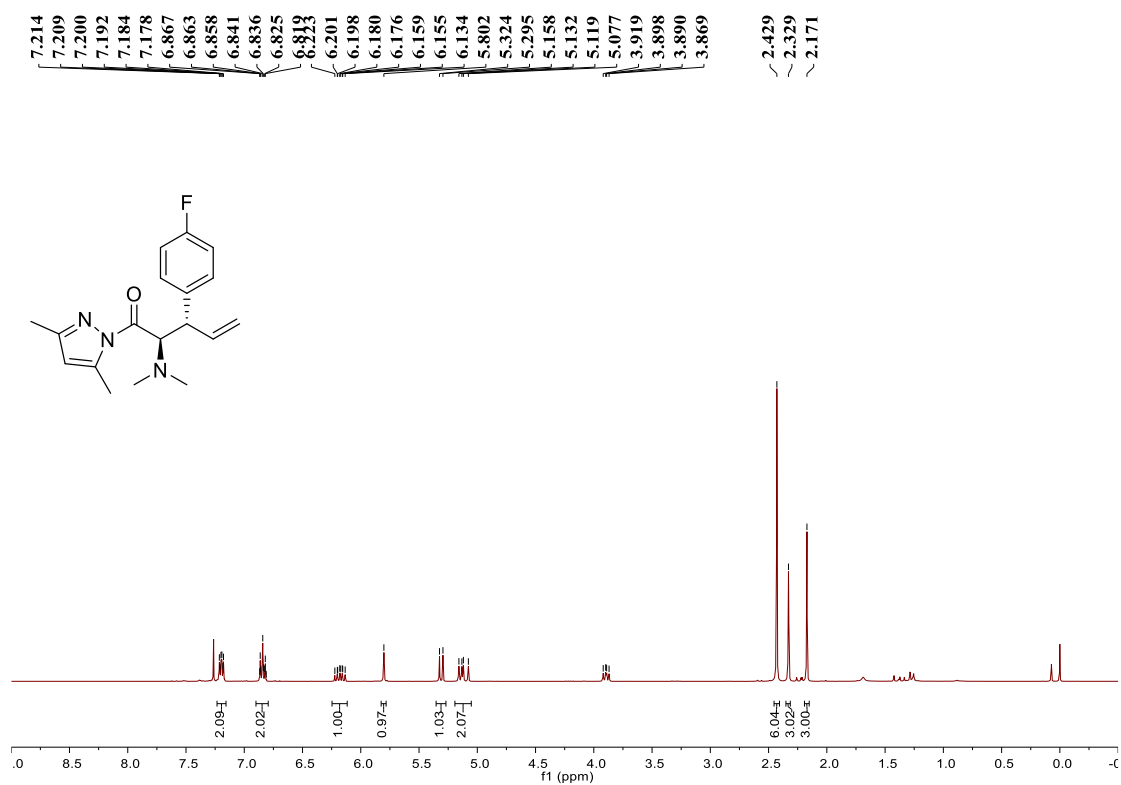

<sup>1</sup>H NMR of Compound **3j** (400 MHz, CDCl<sub>3</sub>)

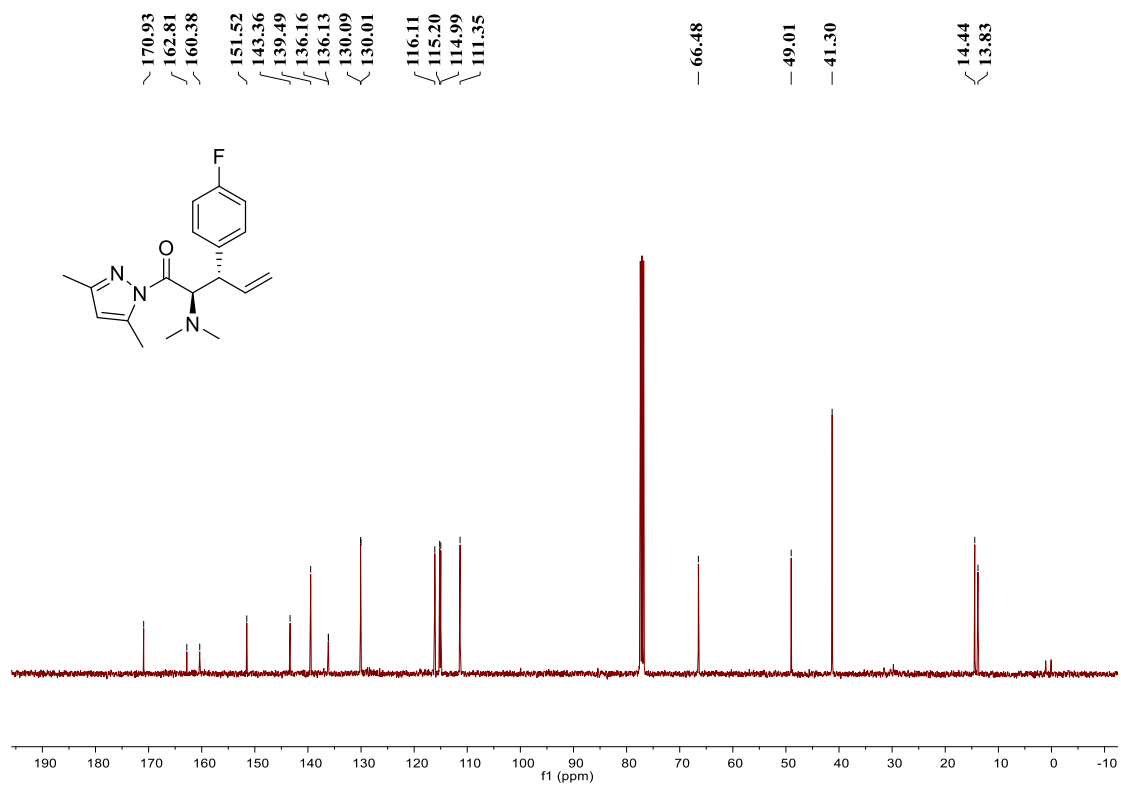

<sup>13</sup>C NMR of Compound of **3j** (101 MHz, CDCl<sub>3</sub>)

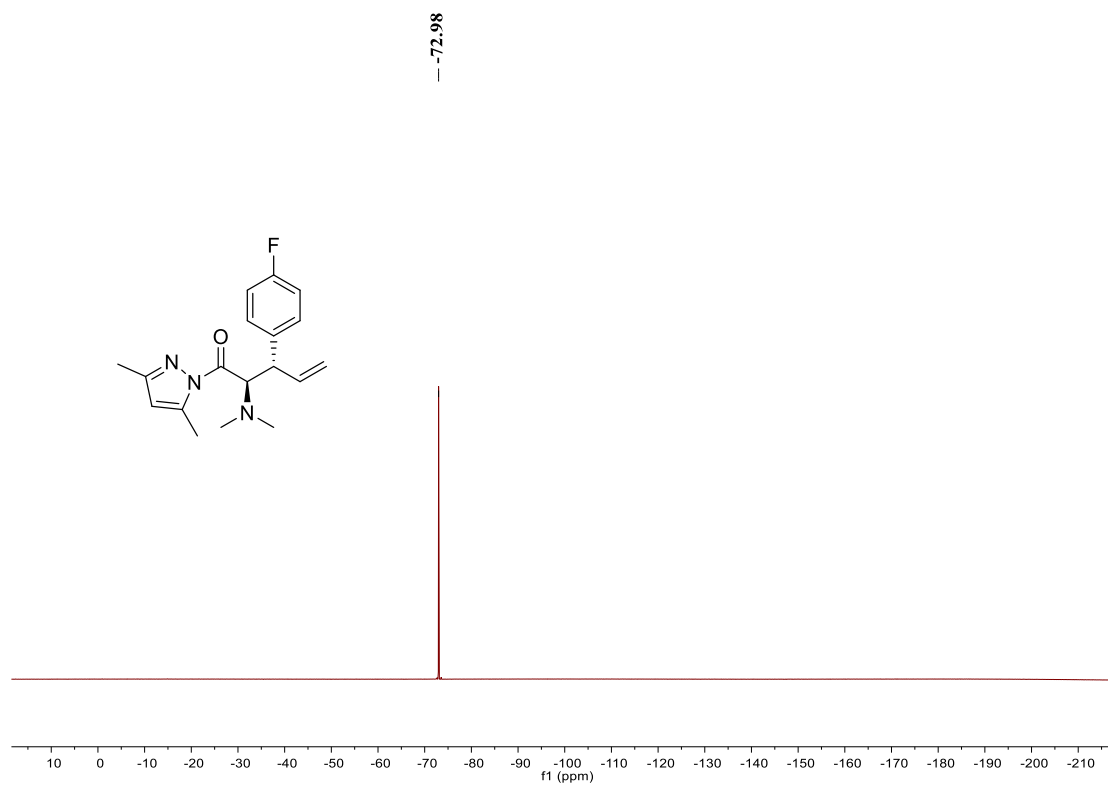

$^{19}\text{F}$  NMR of Compound **3j** (376 MHz,  $\text{CDCl}_3$ )

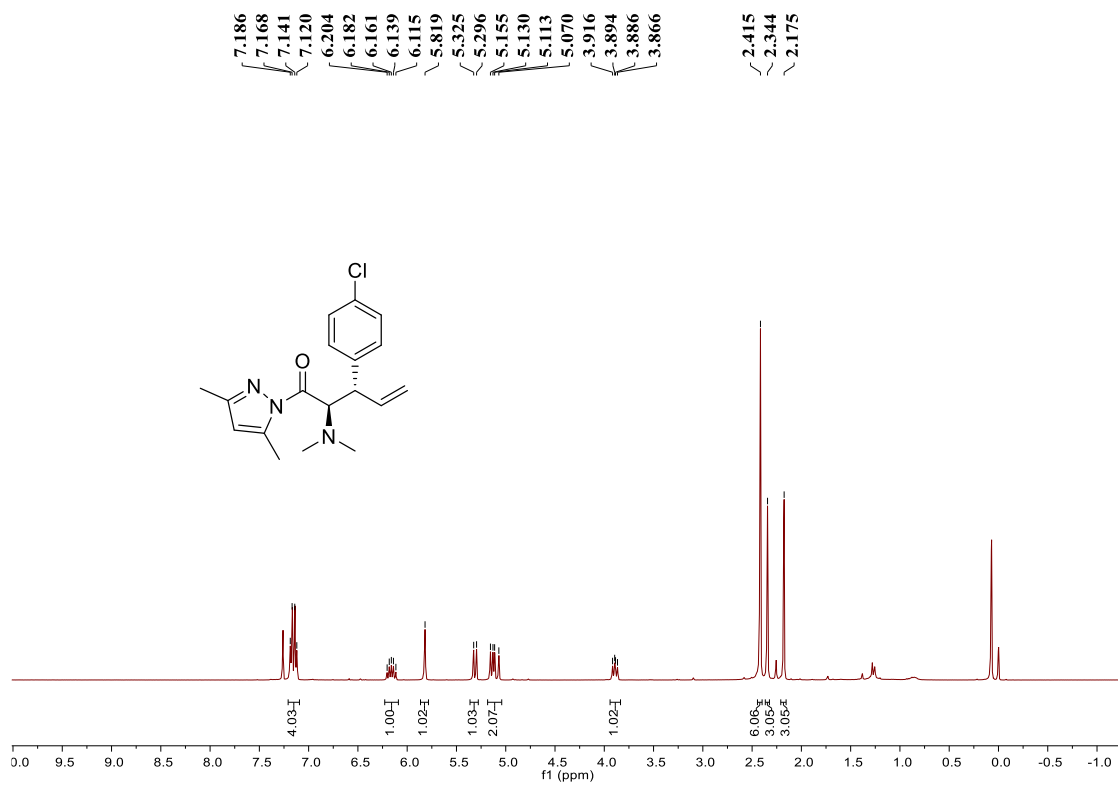

$^1\text{H}$  NMR of Compound of **3k** (400 MHz,  $\text{CDCl}_3$ )

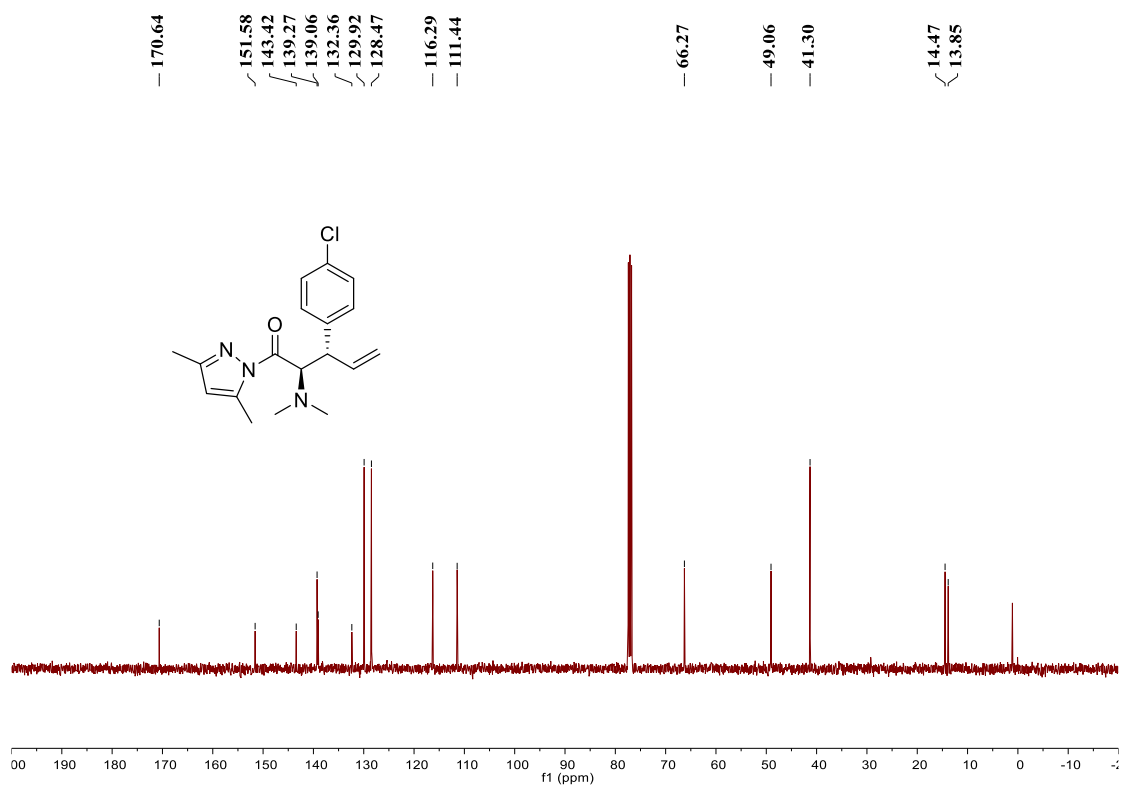

$^{13}\text{C}$  NMR of Compound **3k** (101 MHz,  $\text{CDCl}_3$ )

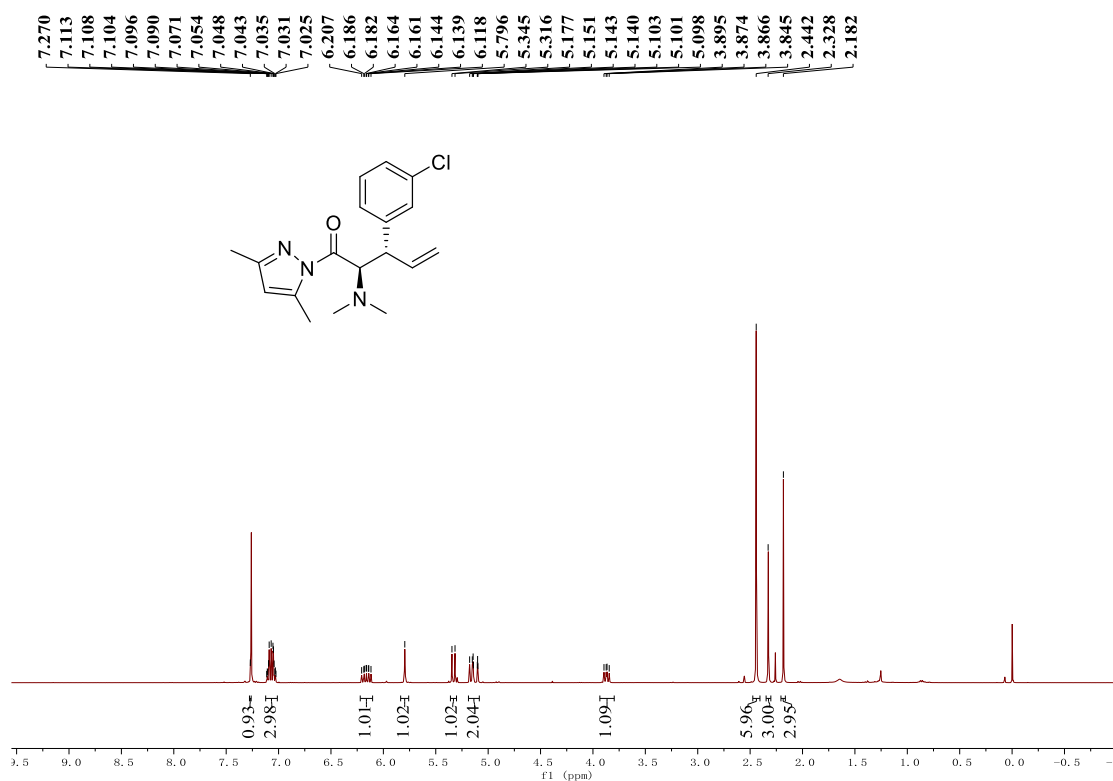

<sup>1</sup>H NMR of Compound 3I (400 MHz, CDCl<sub>3</sub>)

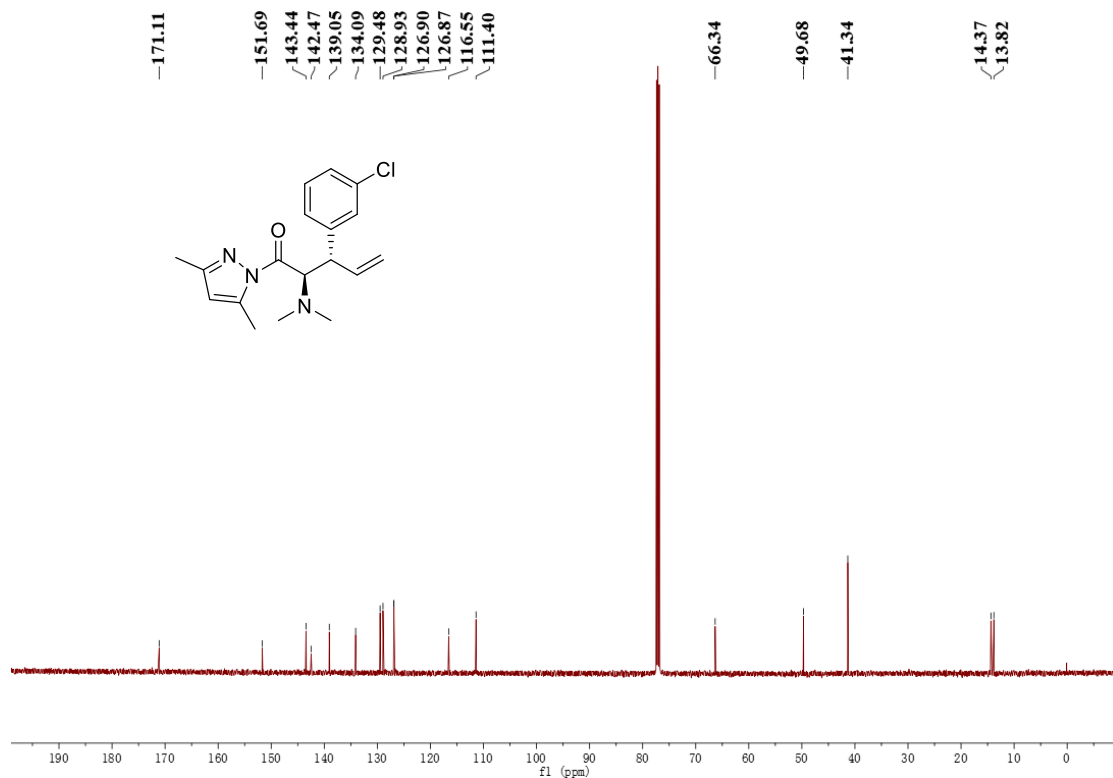

<sup>13</sup>C NMR of Compound 3I (125 MHz, CDCl<sub>3</sub>)

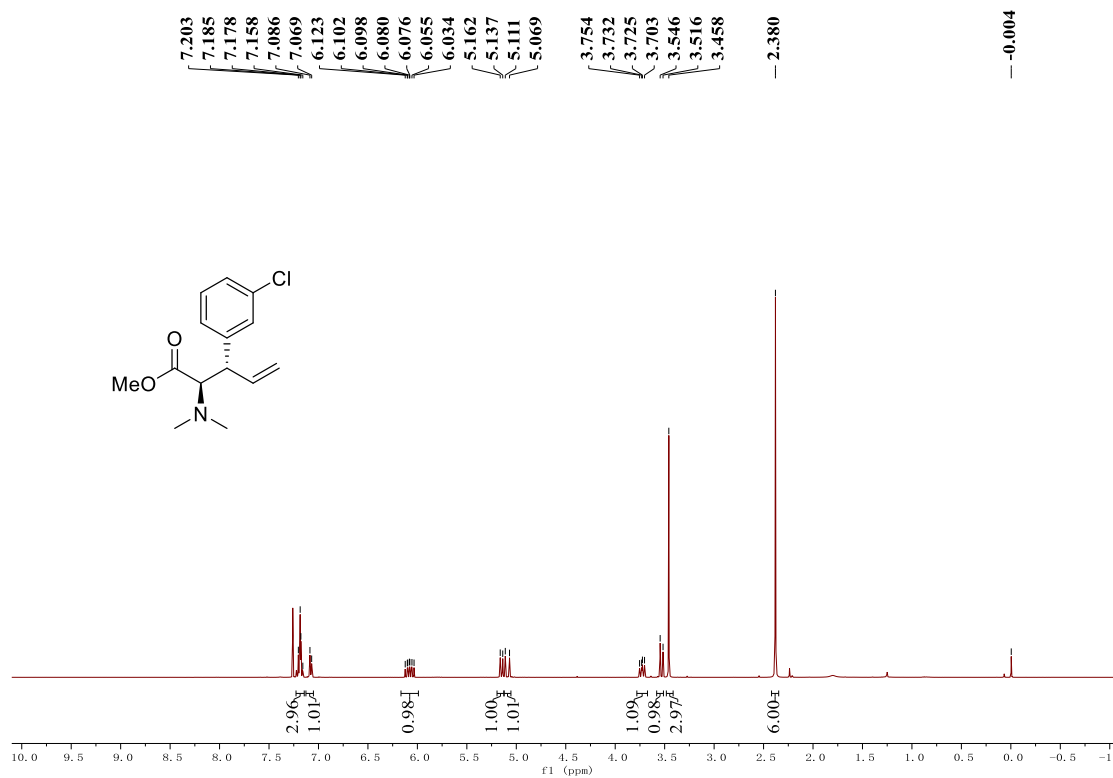

<sup>1</sup>H NMR of Compound 3l-methyl ester (400 MHz, CDCl<sub>3</sub>)

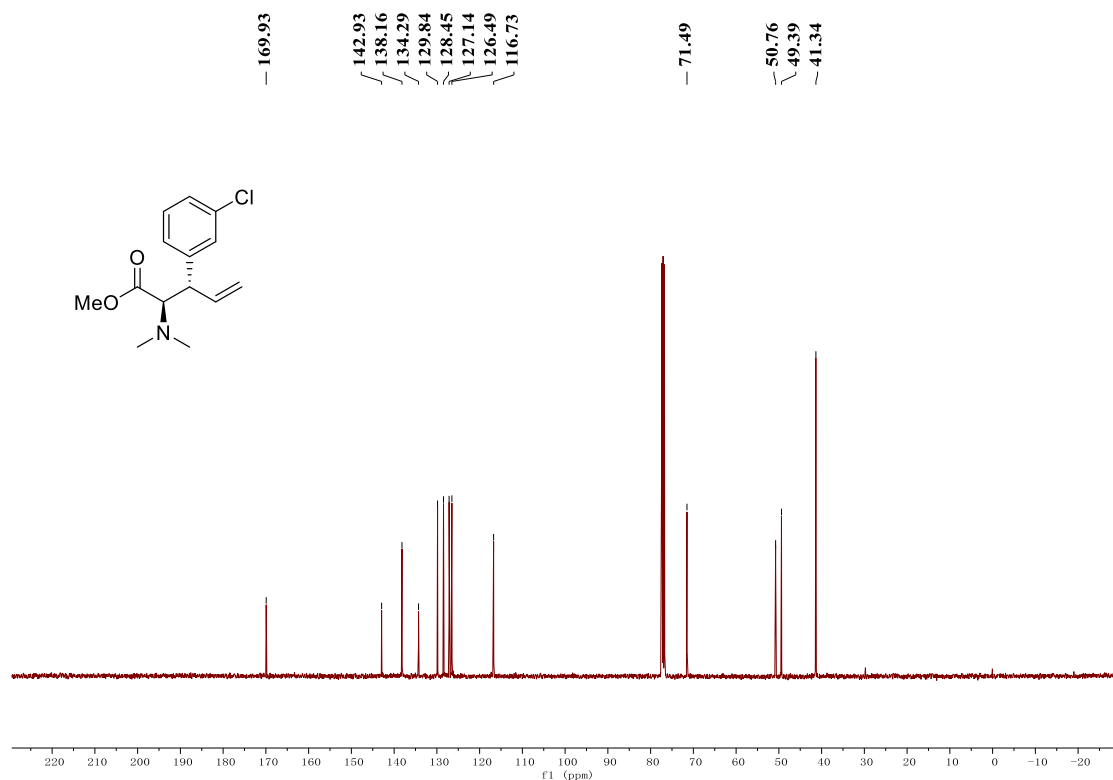

<sup>13</sup>C NMR of Compound 3l-methyl ester (101 MHz, CDCl<sub>3</sub>)

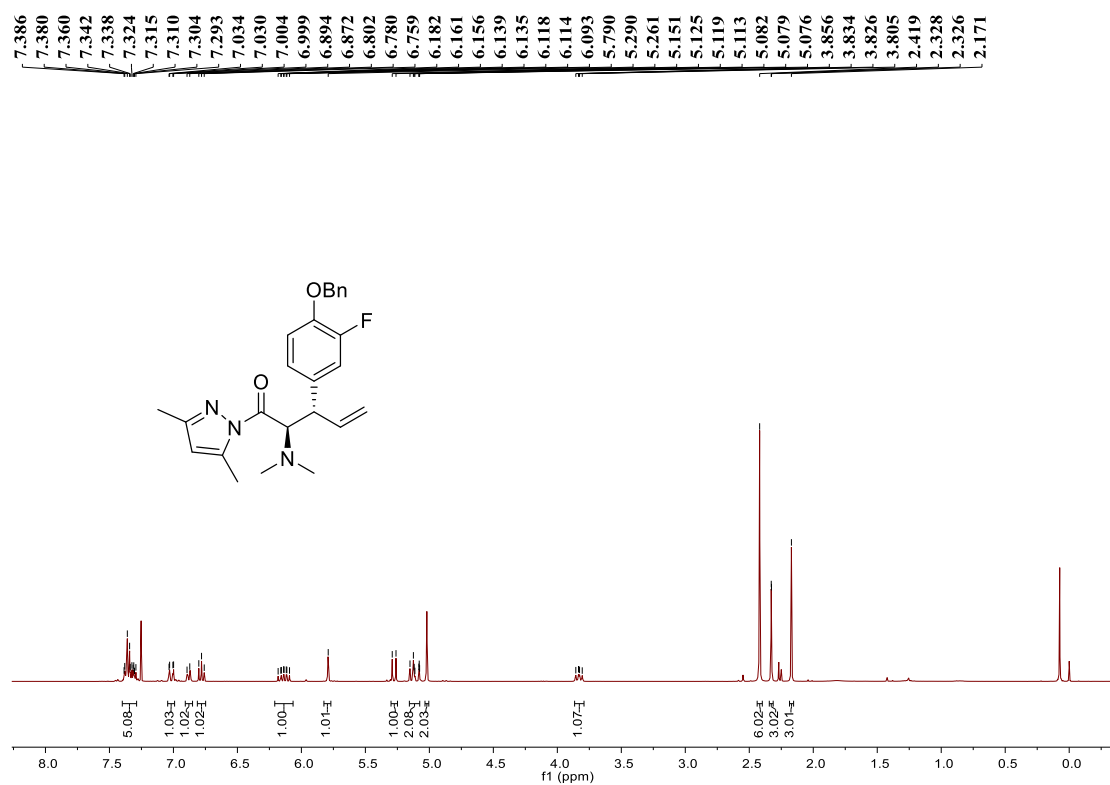

<sup>1</sup>H NMR of Compound **3m** (400 MHz, CDCl<sub>3</sub>)

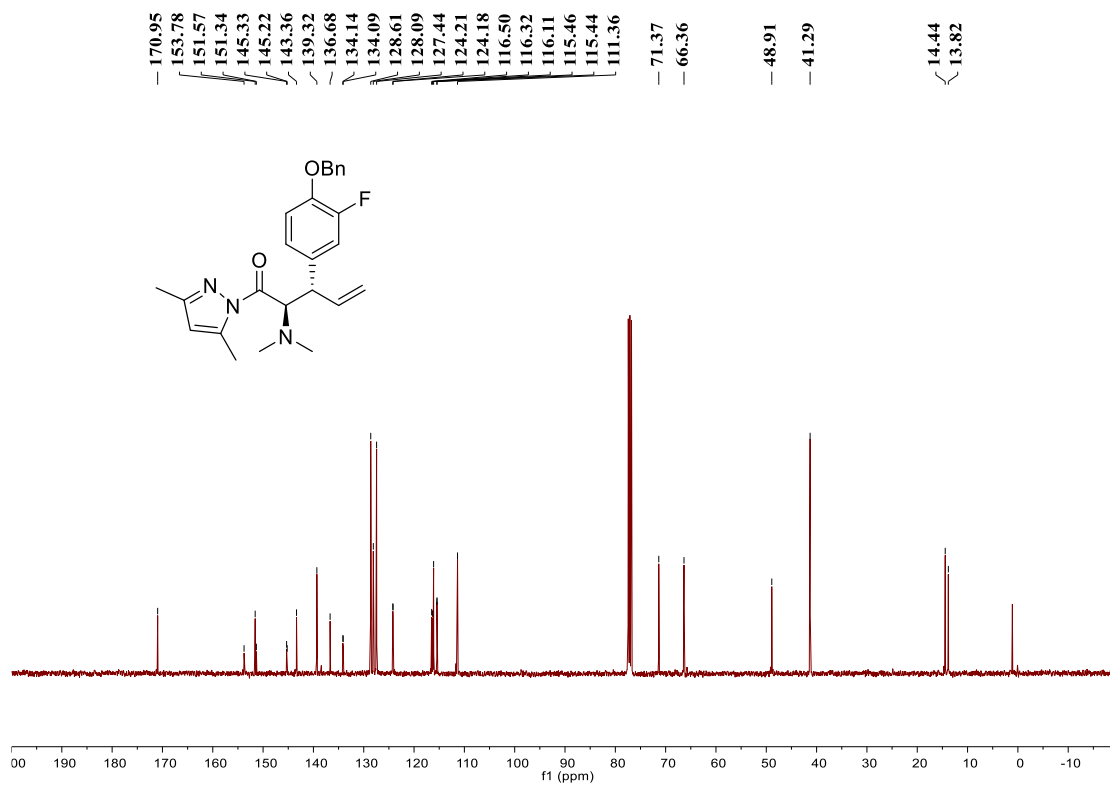

<sup>13</sup>C NMR of Compound **3m** (101 MHz, CDCl<sub>3</sub>)

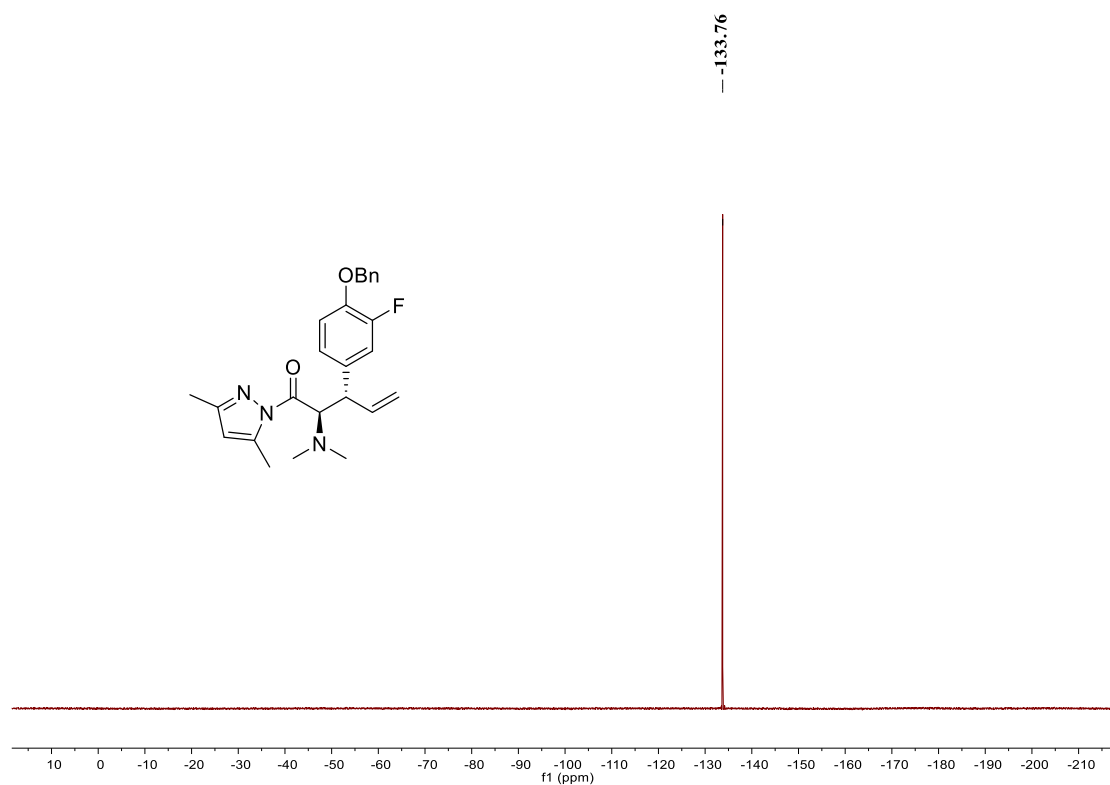

$^{19}\text{F}$  NMR of Compound **3m** (376 MHz,  $\text{CDCl}_3$ )



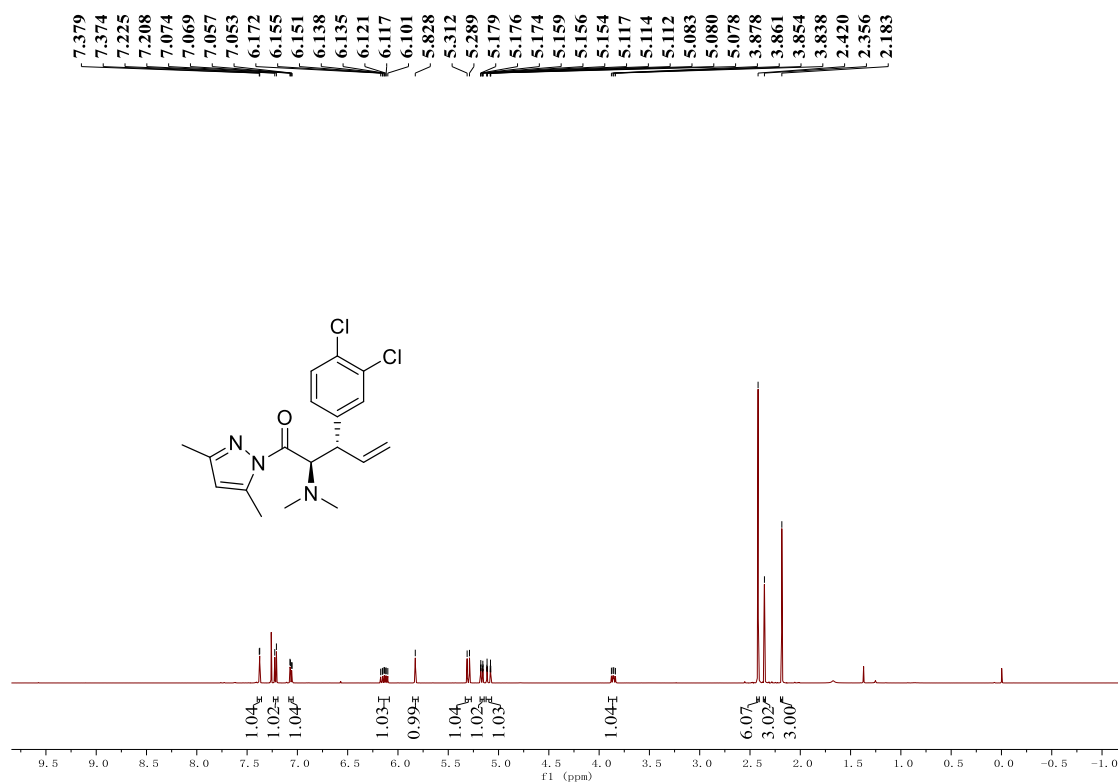

<sup>1</sup>H NMR of Compound **3n** (500 MHz, CDCl<sub>3</sub>)

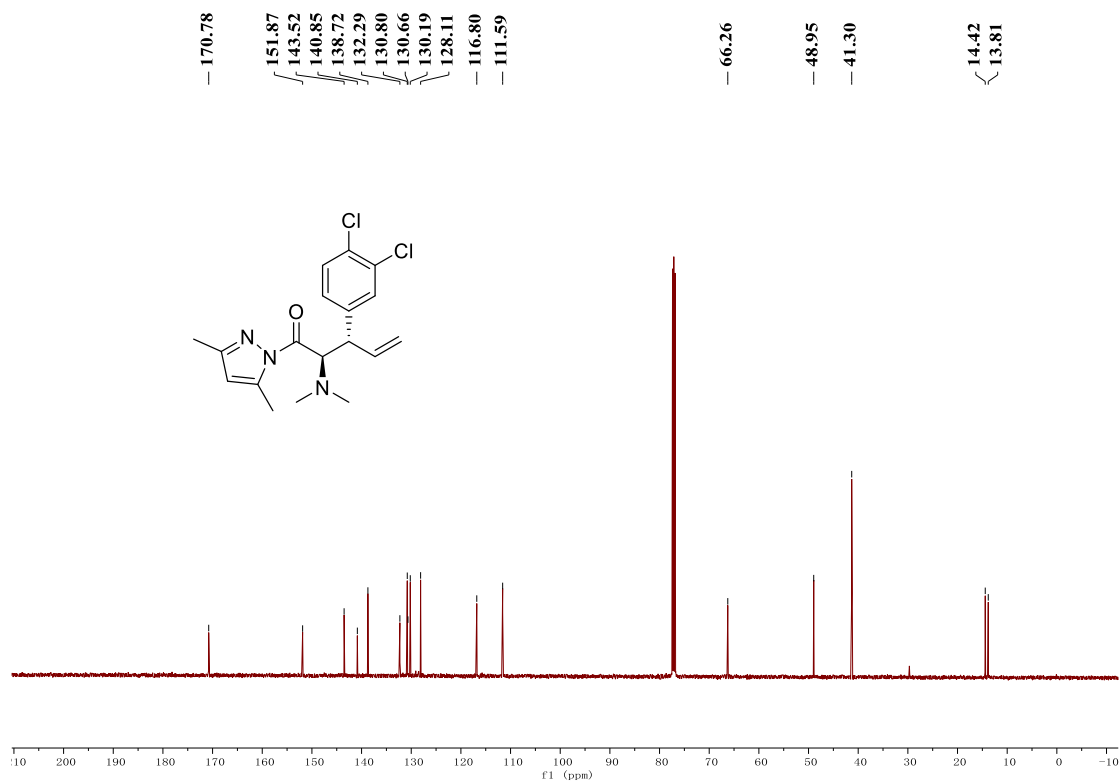

<sup>13</sup>C NMR of Compound **3n** (125 MHz, CDCl<sub>3</sub>)

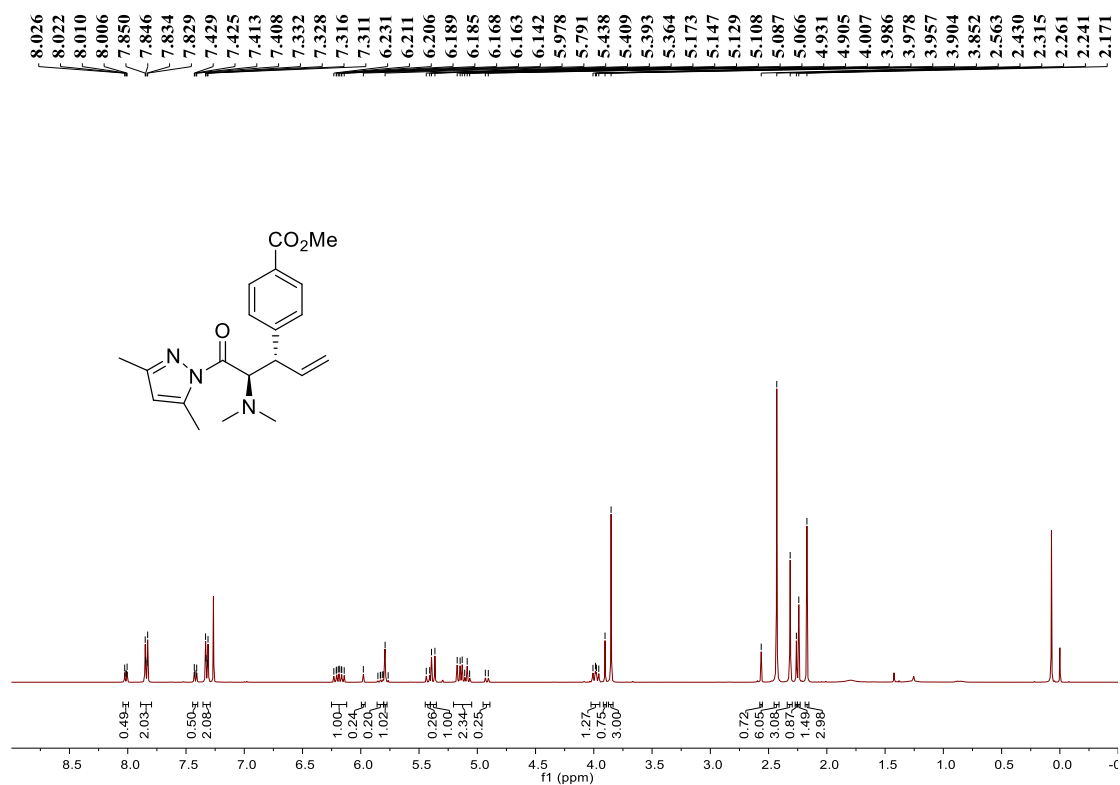

<sup>1</sup>H NMR of Compound **3o** (400 MHz, CDCl<sub>3</sub>)

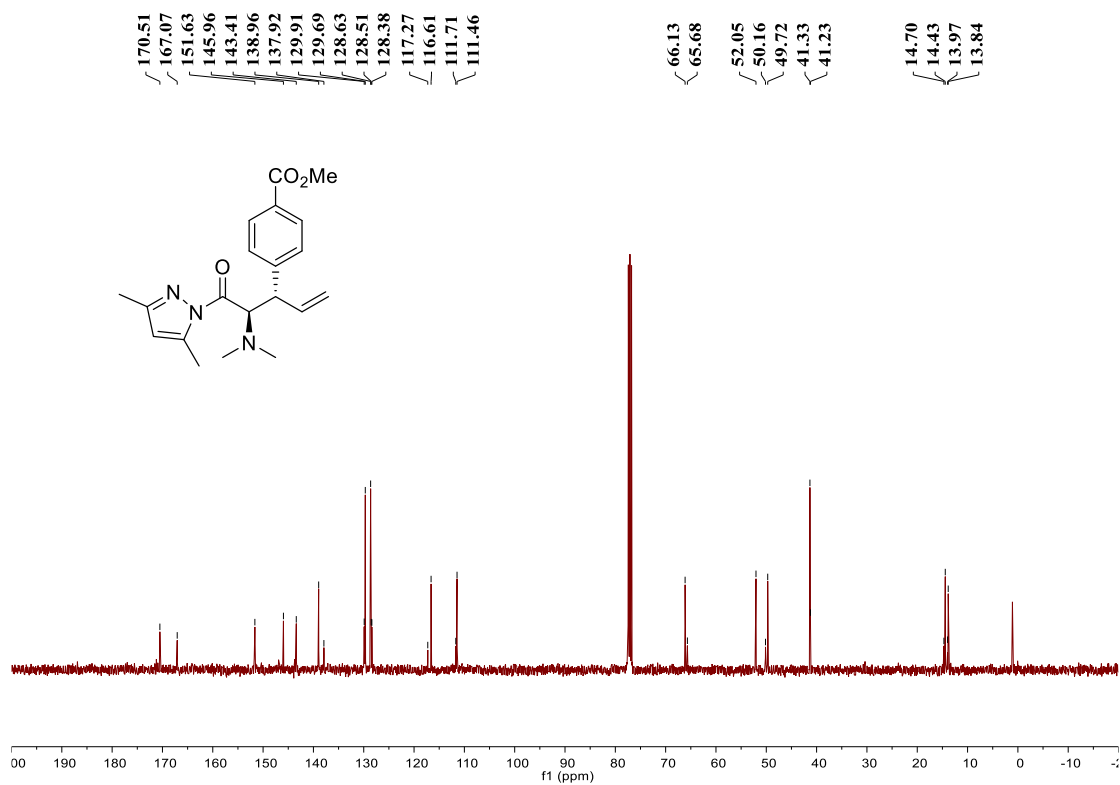

<sup>13</sup>C NMR of Compound **3o** (101 MHz, CDCl<sub>3</sub>)

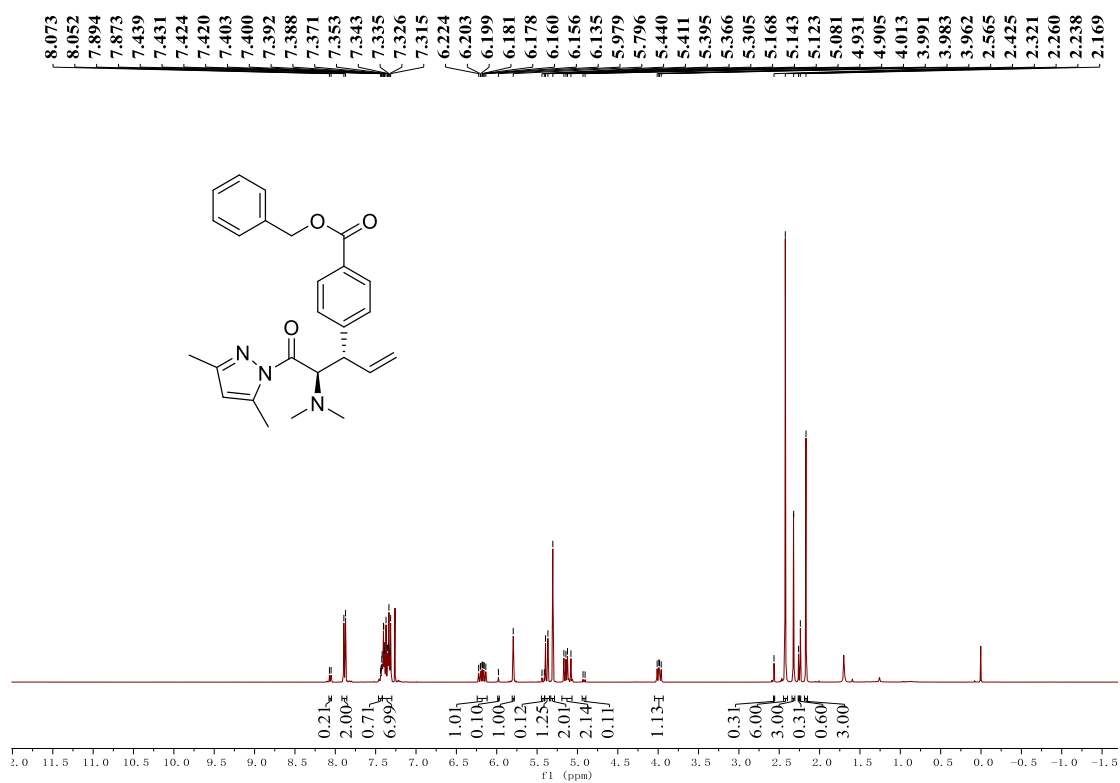

<sup>1</sup>H NMR of Compound 3p (400 MHz, CDCl<sub>3</sub>)

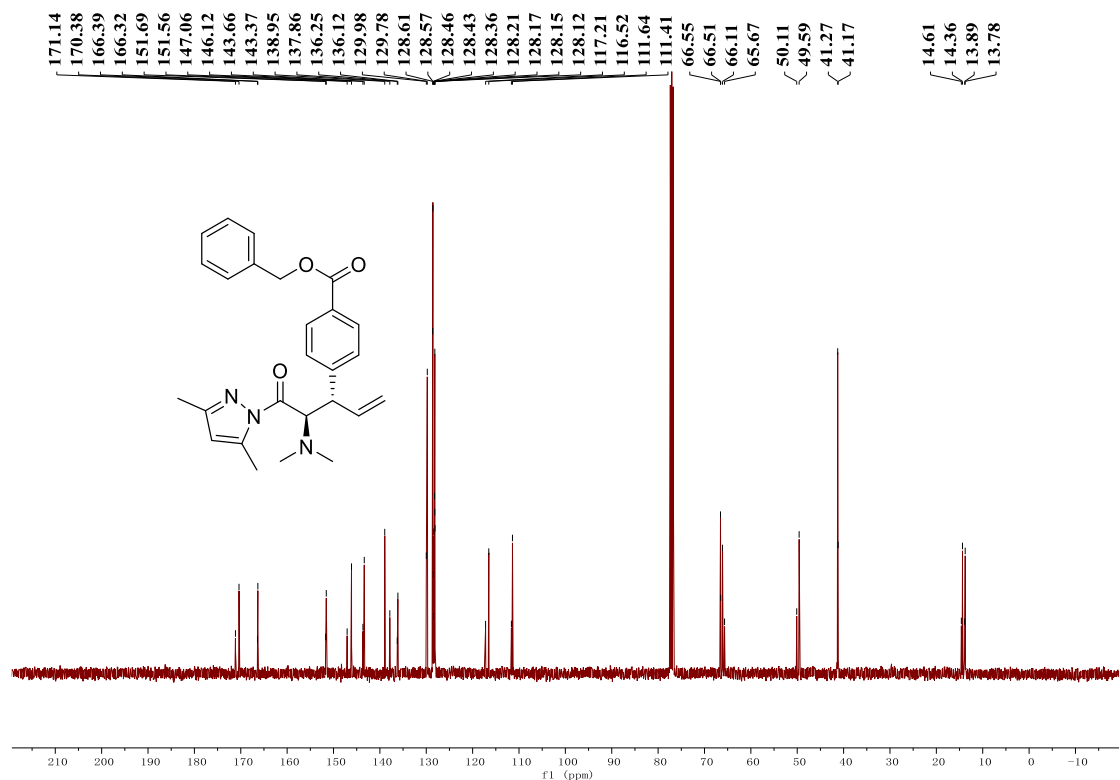

<sup>13</sup>C NMR of Compound 3p (101 MHz, CDCl<sub>3</sub>)

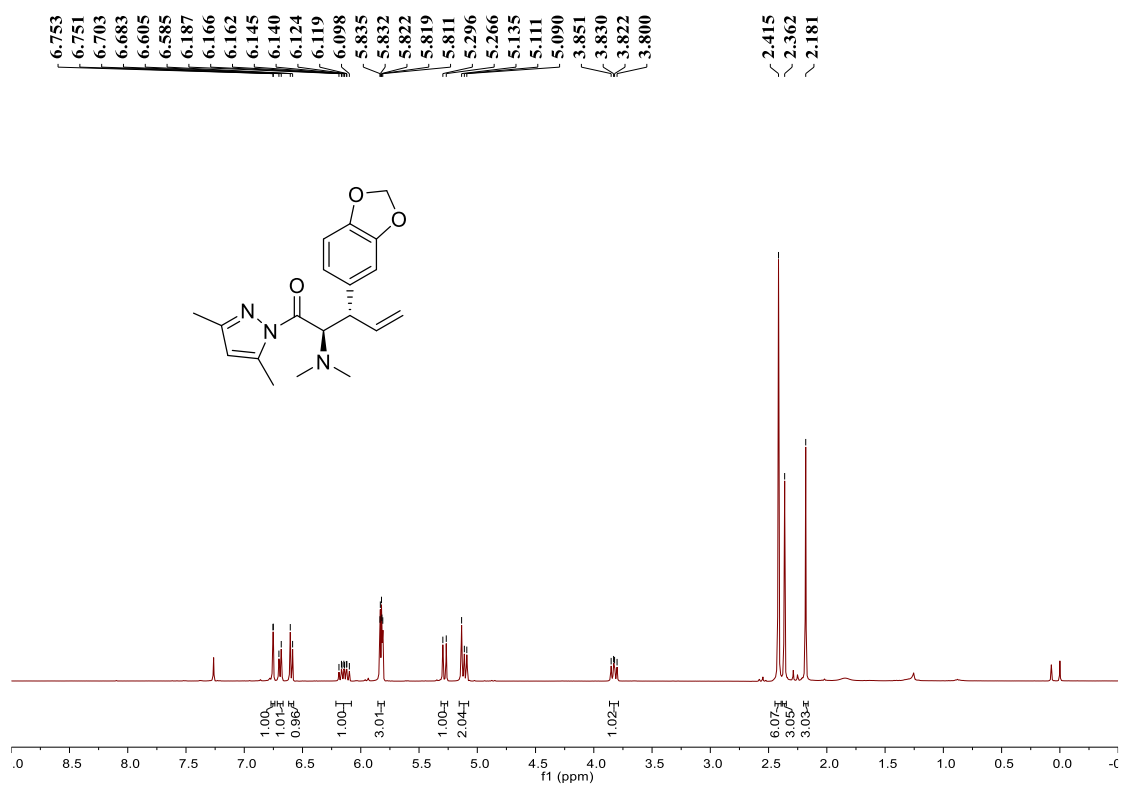

<sup>1</sup>H NMR of Compound **3q** (400 MHz, CDCl<sub>3</sub>)

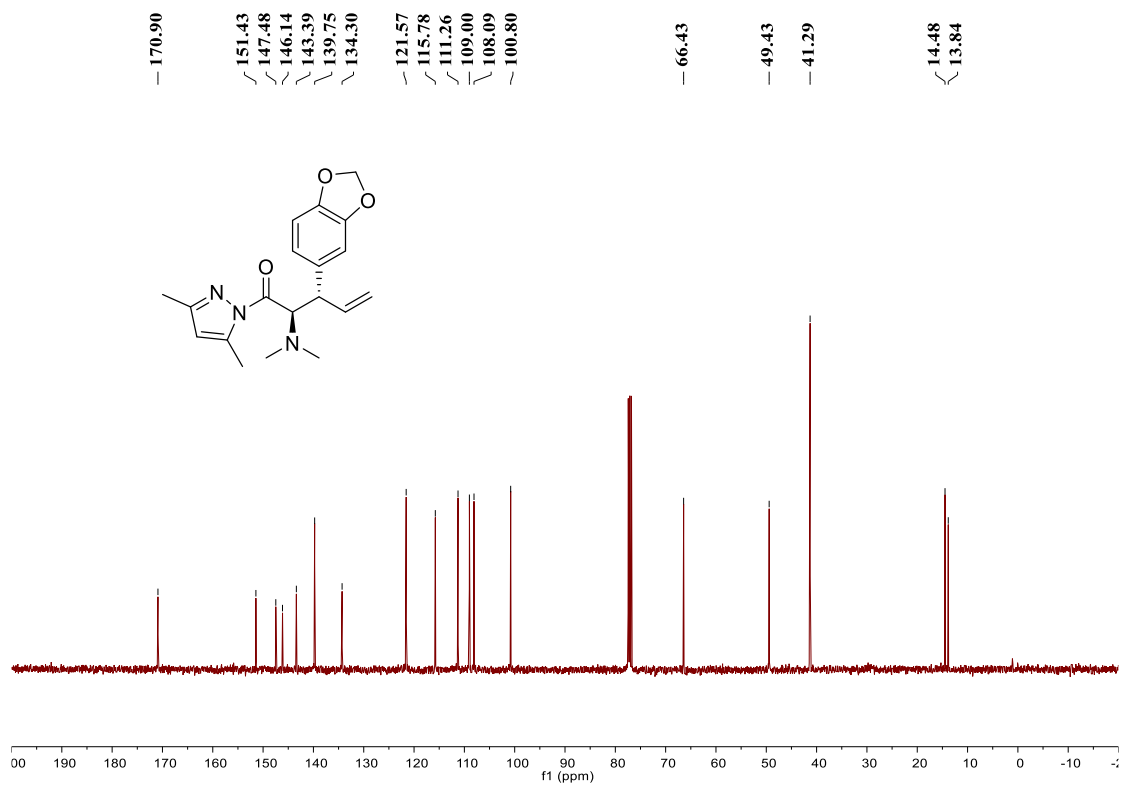

<sup>13</sup>C NMR of Compound **3q** (101 MHz, CDCl<sub>3</sub>)

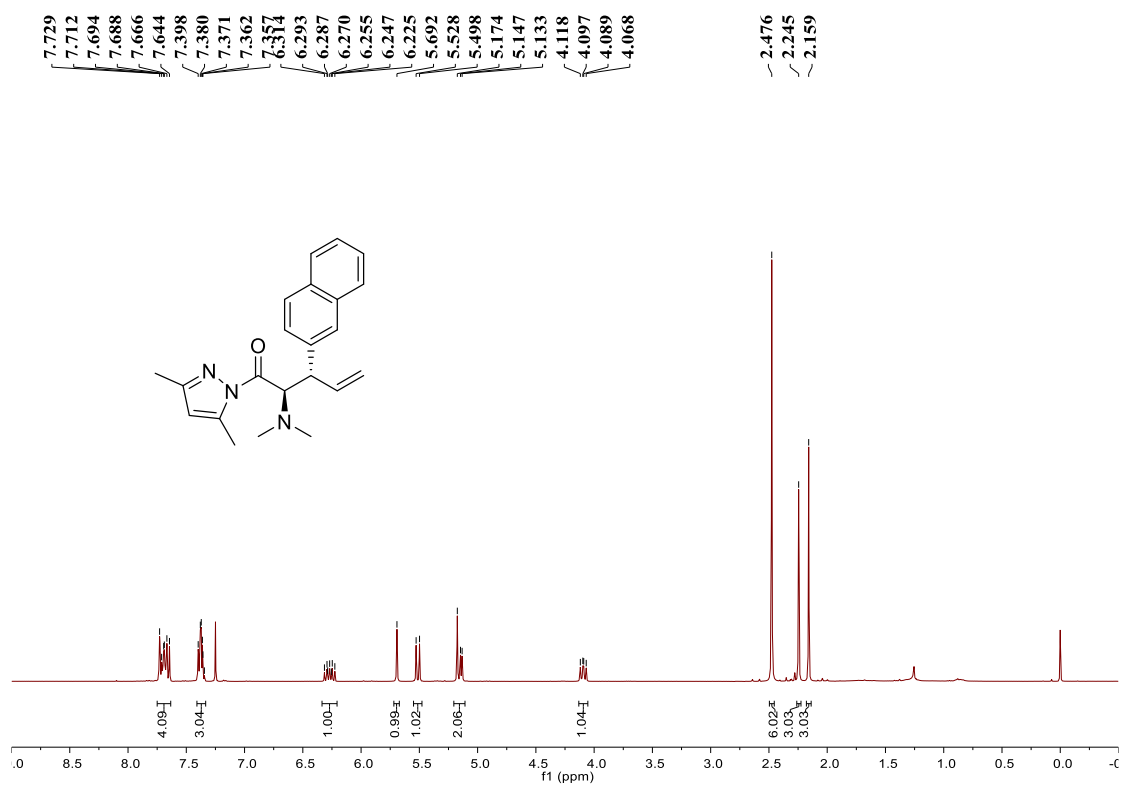

<sup>1</sup>H NMR of Compound **3r** (400 MHz, CDCl<sub>3</sub>)

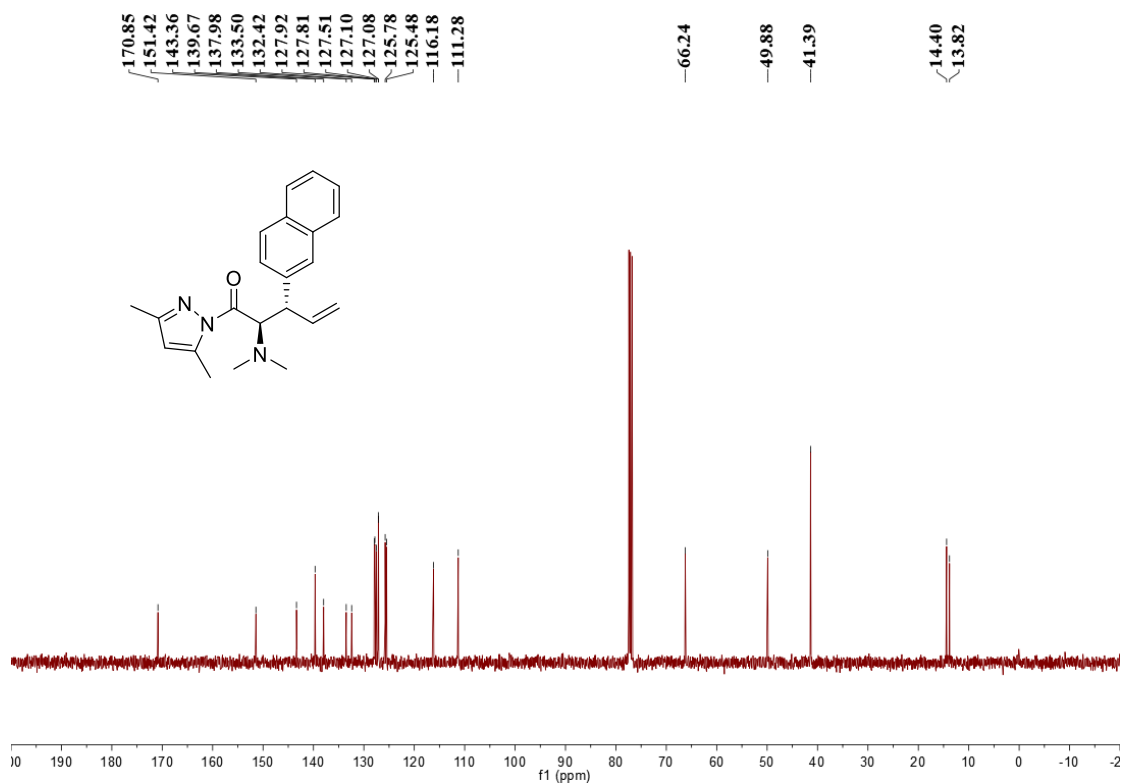

<sup>13</sup>C NMR of Compound **3r** (101 MHz, CDCl<sub>3</sub>)

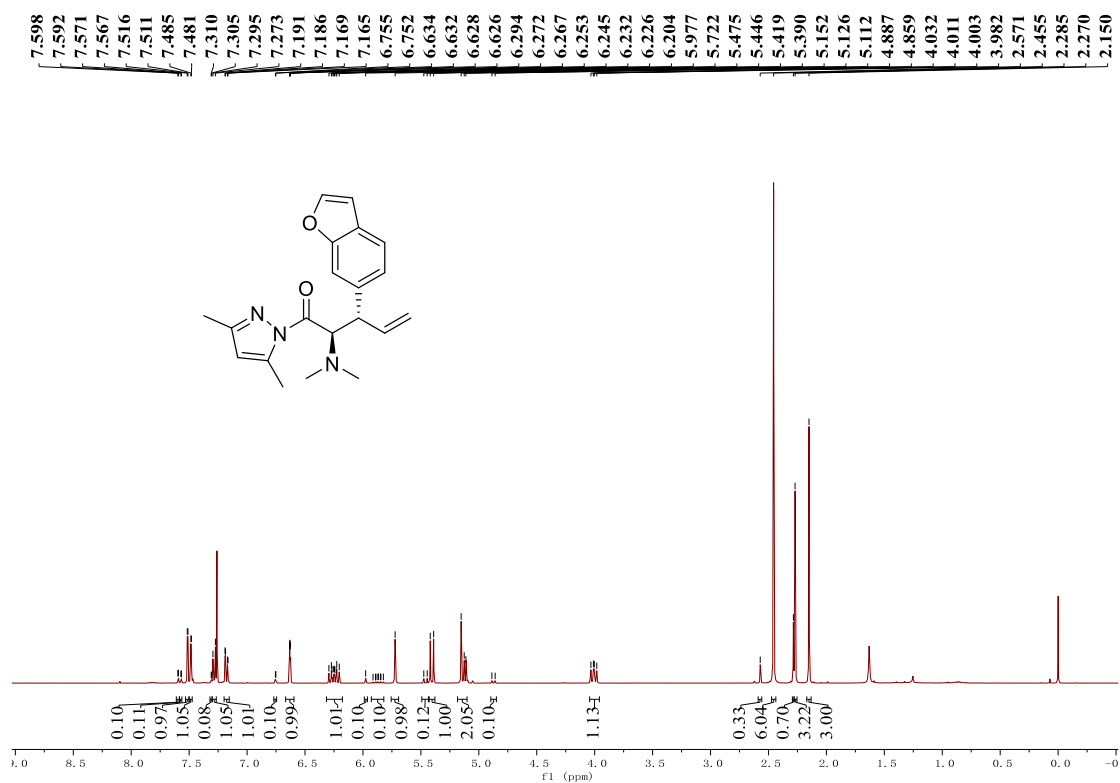

<sup>1</sup>H NMR of Compound 3s (400 MHz, CDCl<sub>3</sub>)

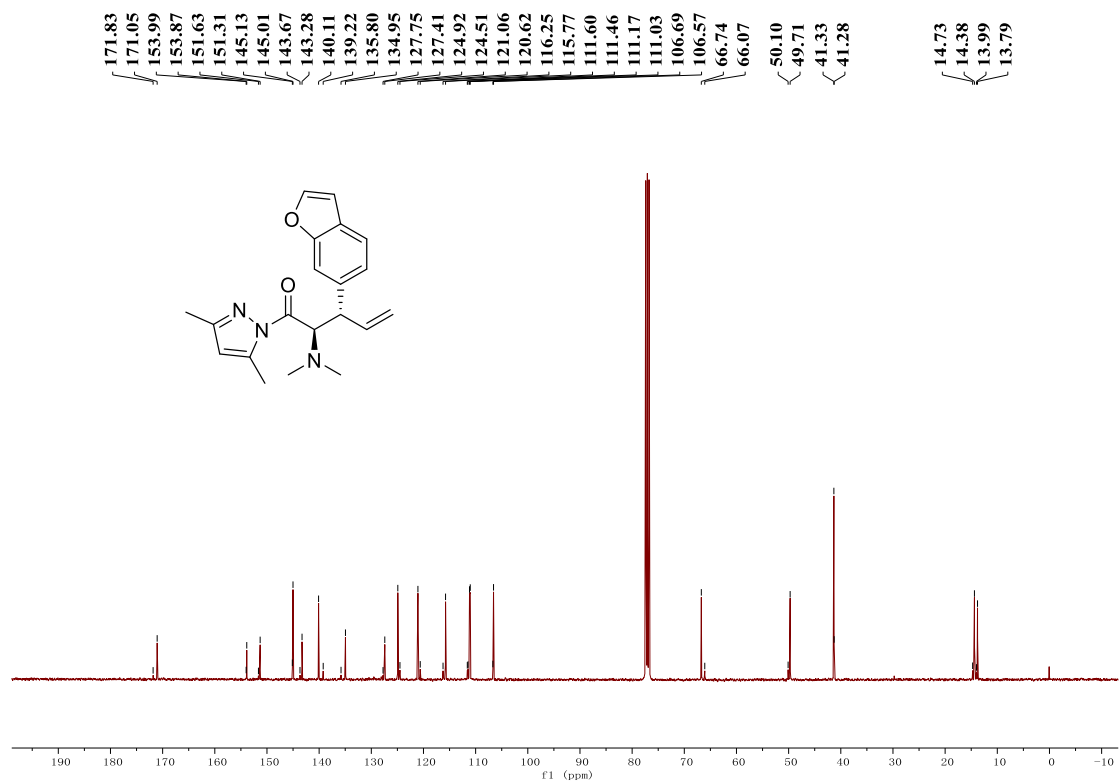

<sup>13</sup>C NMR of Compound 3s (101 MHz, CDCl<sub>3</sub>)

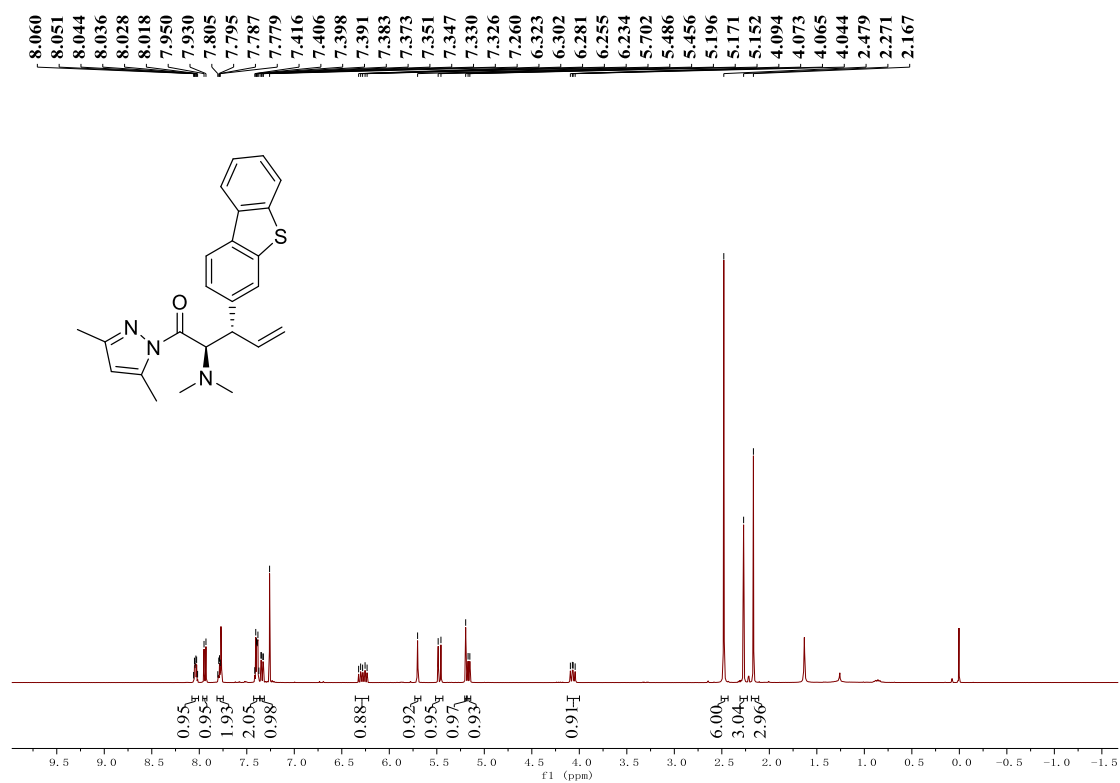

<sup>1</sup>H NMR of Compound 3t (400 MHz, CDCl<sub>3</sub>)

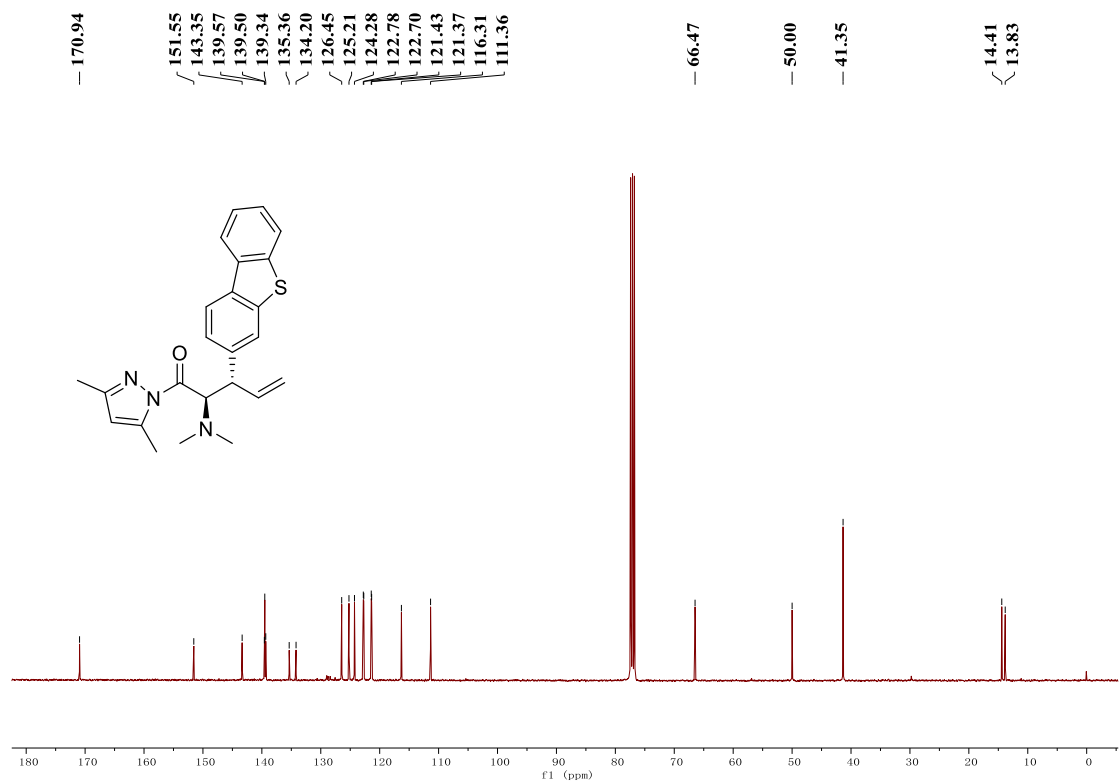

<sup>13</sup>C NMR of Compound 3t (101 MHz, CDCl<sub>3</sub>)

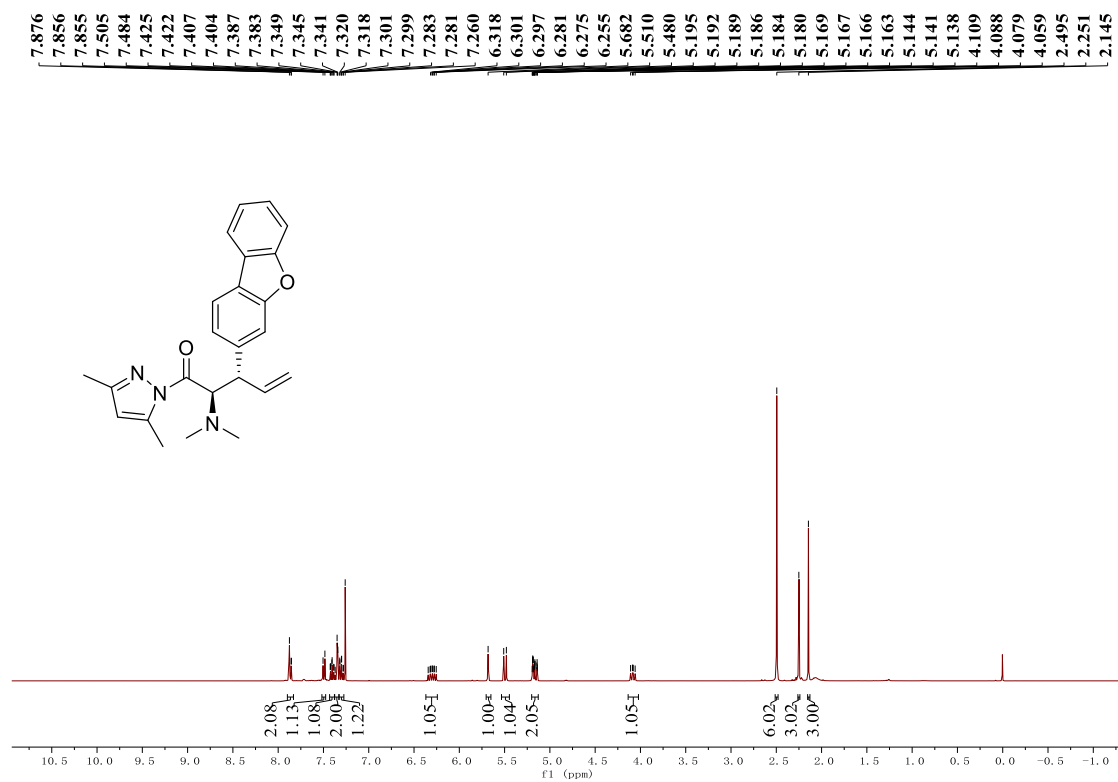

<sup>1</sup>H NMR of Compound **3u** (400 MHz, CDCl<sub>3</sub>)

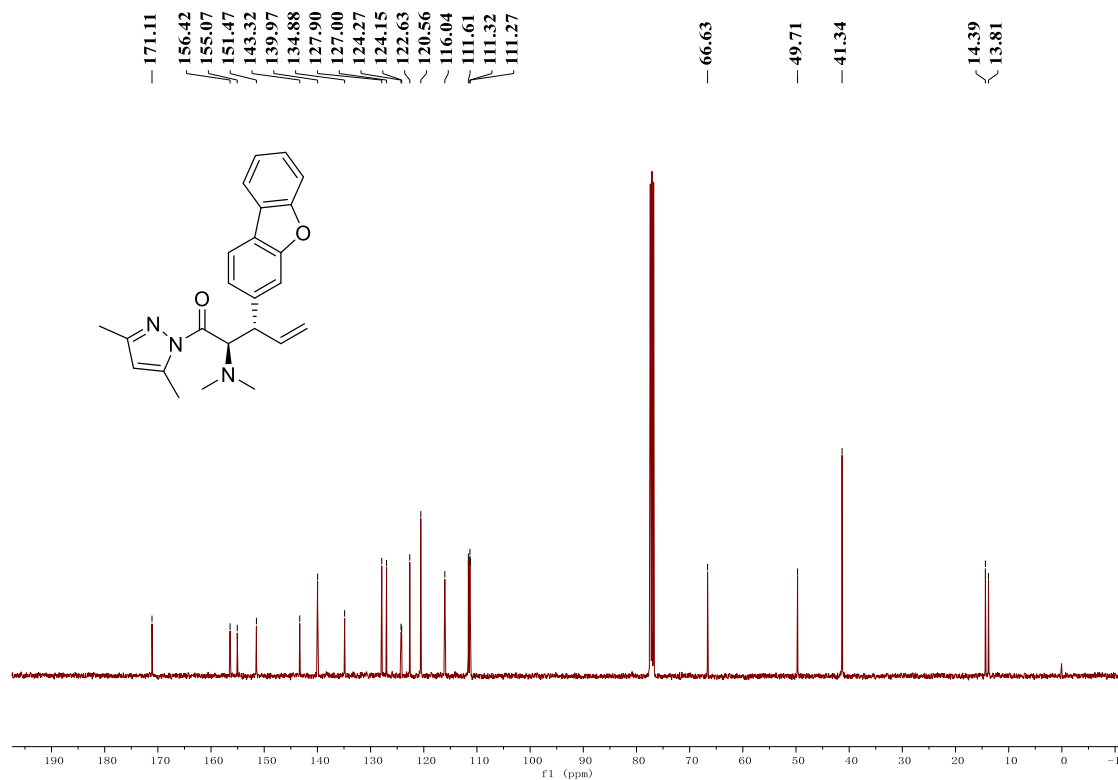

<sup>13</sup>C NMR of Compound **3u** (101 MHz, CDCl<sub>3</sub>)



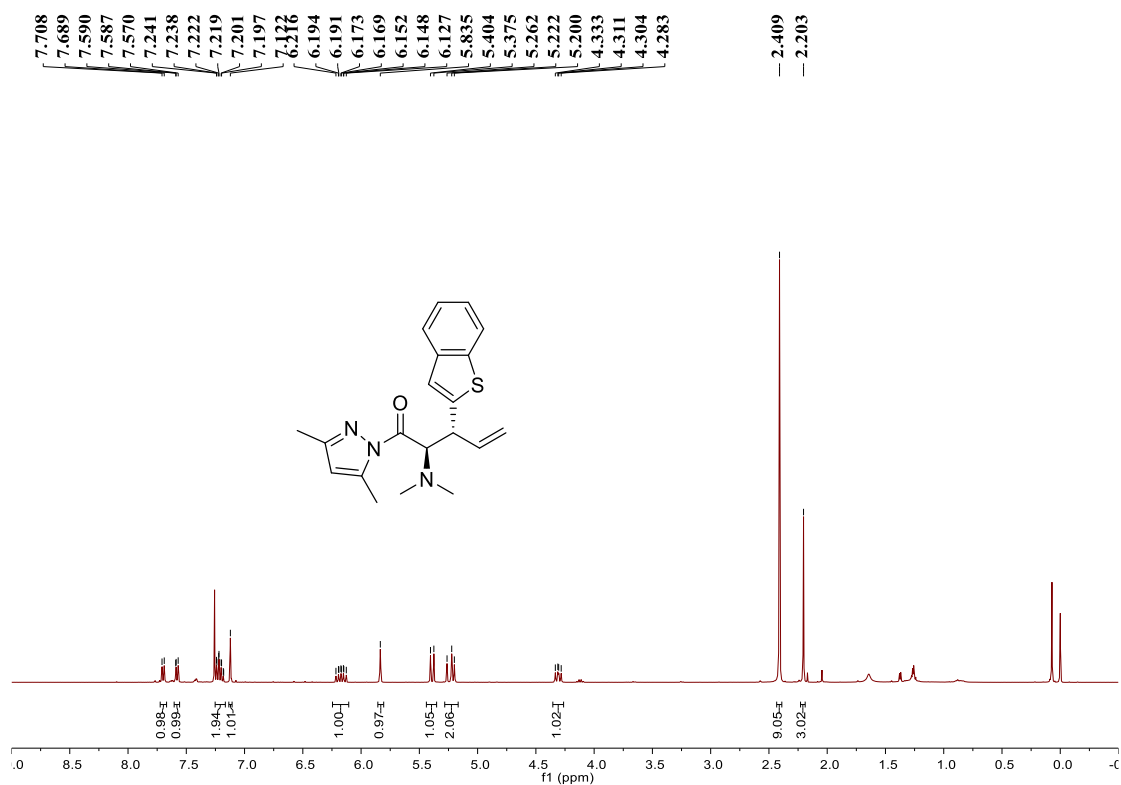

<sup>1</sup>H NMR of Compound 3v (400 MHz, CDCl<sub>3</sub>)

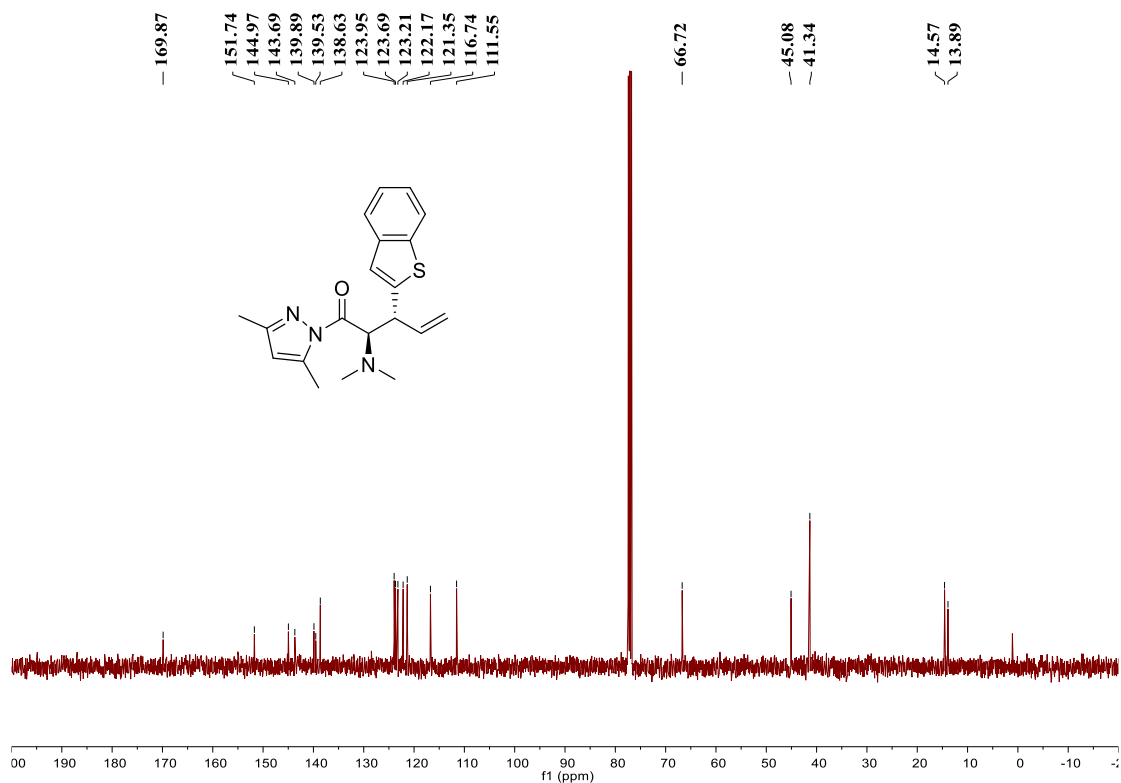

<sup>13</sup>C NMR of Compound 3v (101 MHz, CDCl<sub>3</sub>)

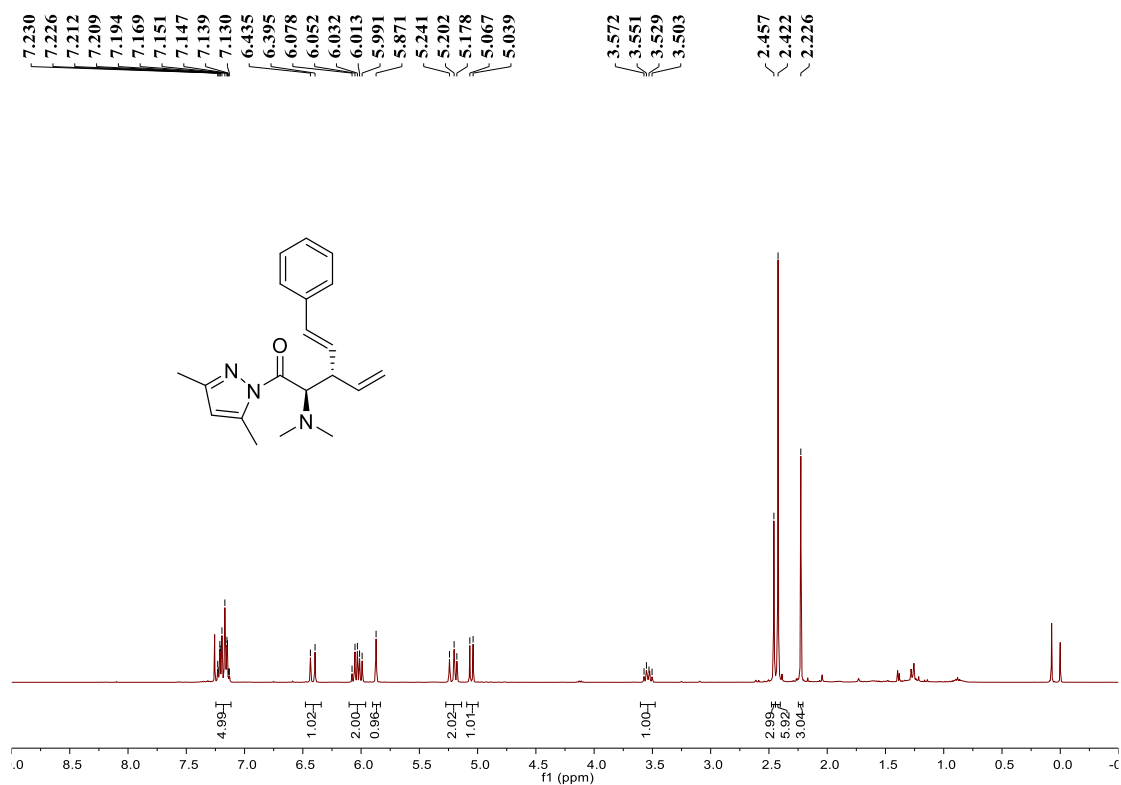

<sup>1</sup>H NMR of Compound **3w** (400 MHz, CDCl<sub>3</sub>)

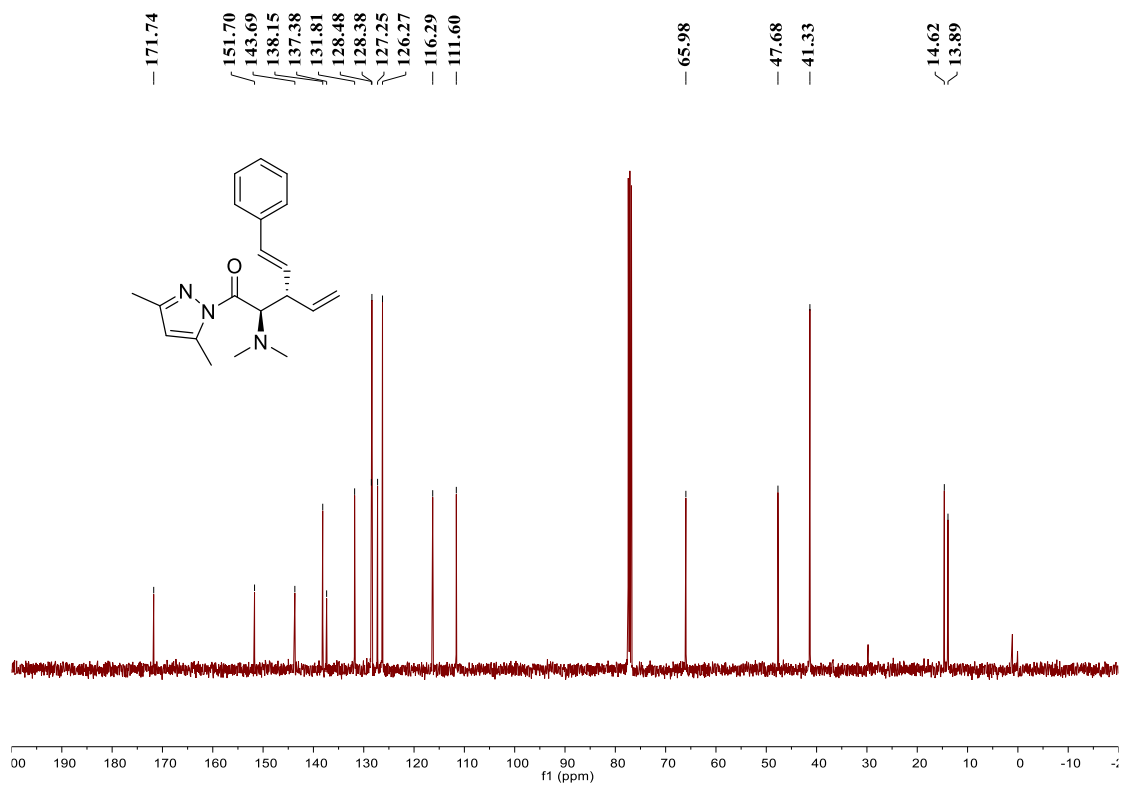

<sup>13</sup>C NMR of Compound **3w** (101 MHz, CDCl<sub>3</sub>)

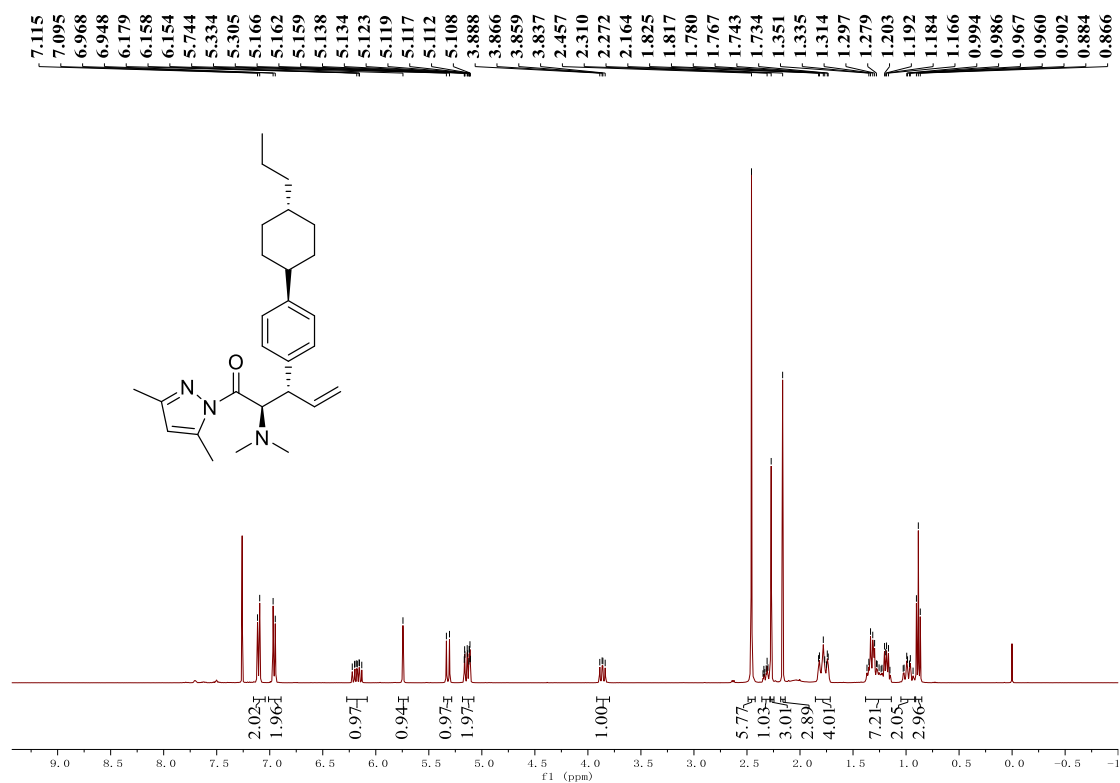

**<sup>1</sup>H NMR of Compound 3x (400 MHz, CDCl<sub>3</sub>)**

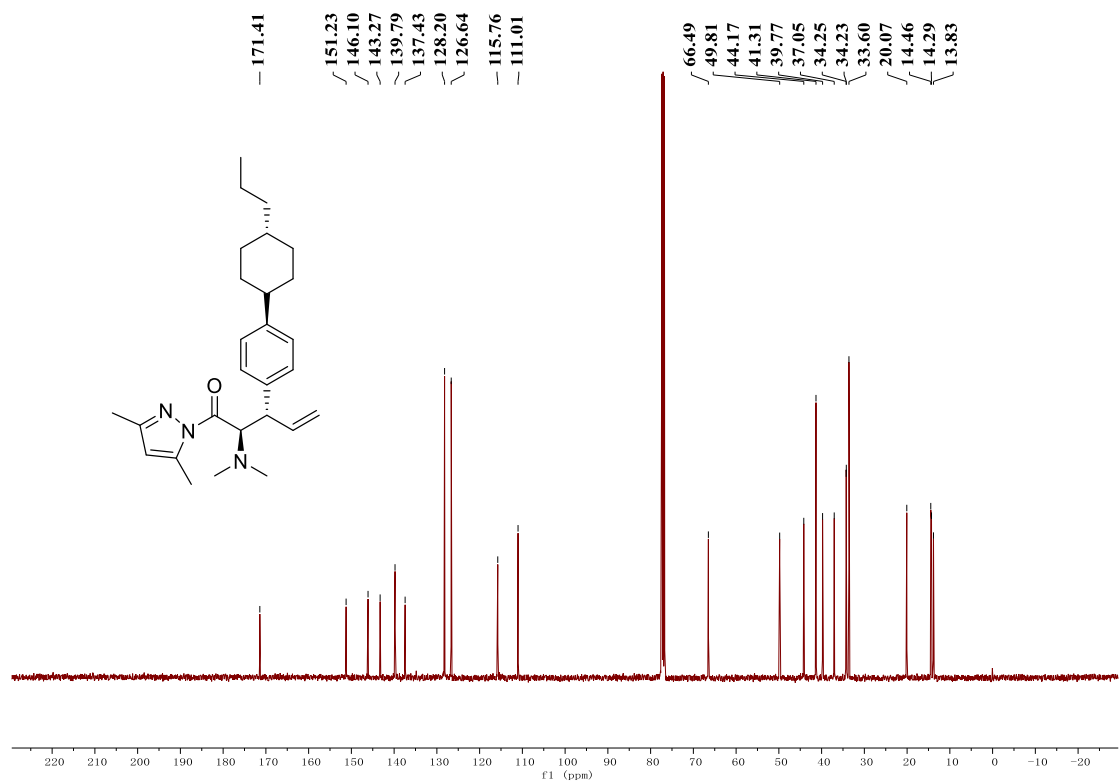

**<sup>13</sup>C NMR of Compound 3x (101 MHz, CDCl<sub>3</sub>)**

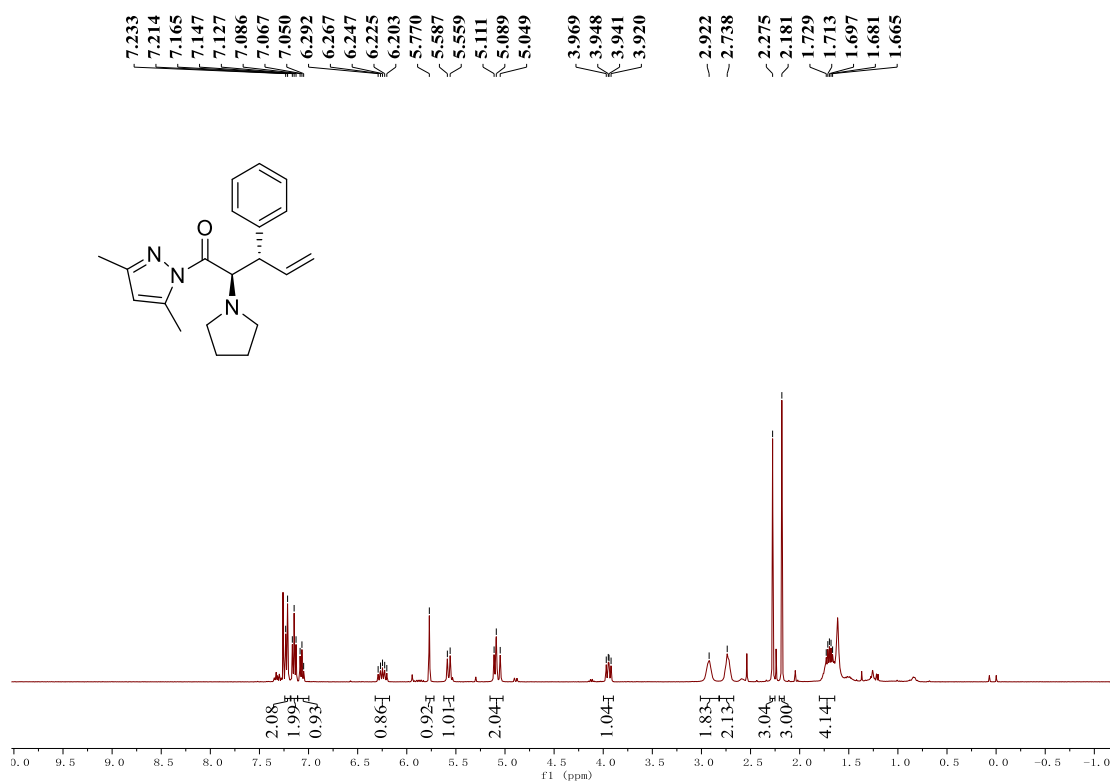

<sup>1</sup>H NMR of Compound 3aa (400 MHz, CDCl<sub>3</sub>)

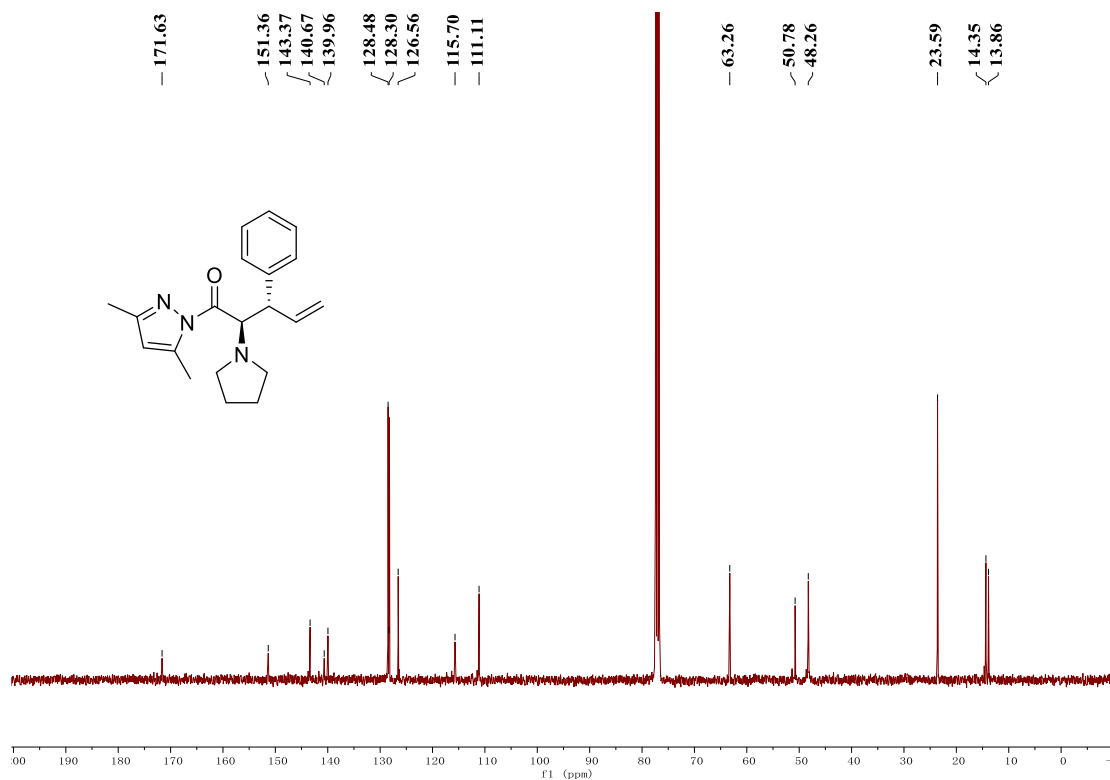

<sup>13</sup>C NMR of Compound 3aa (101 MHz, CDCl<sub>3</sub>)

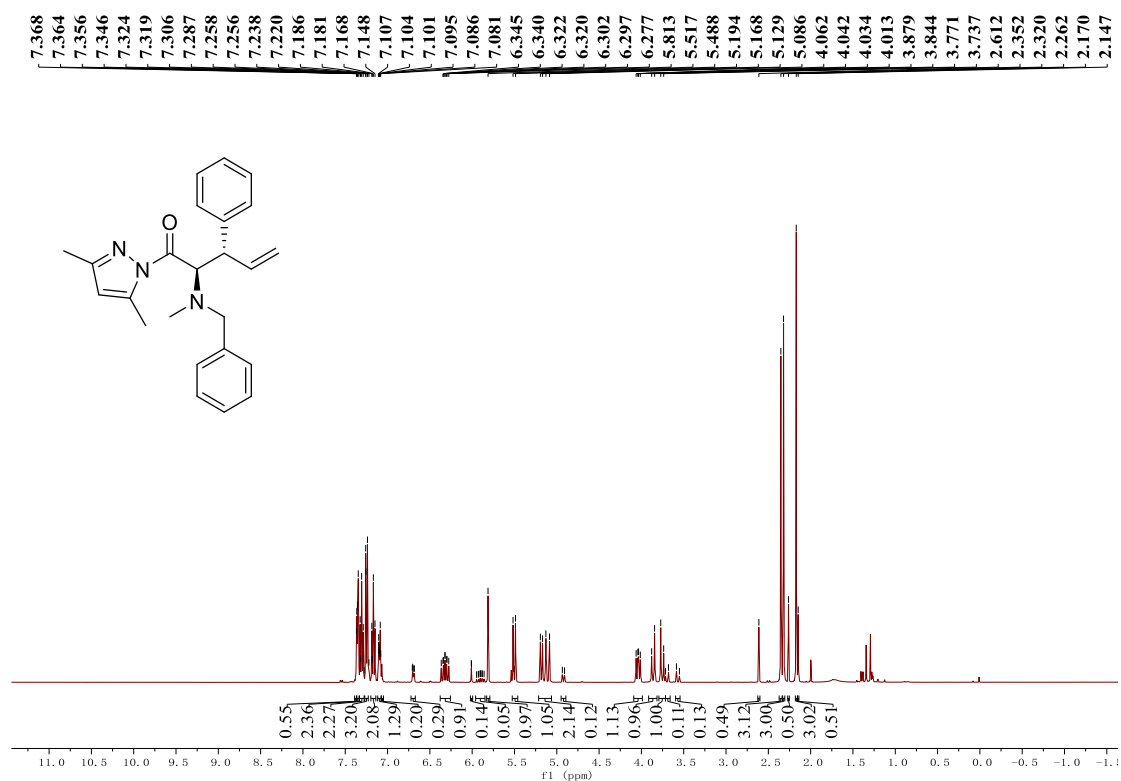

<sup>1</sup>H NMR of Compound **3ab** (400 MHz, CDCl<sub>3</sub>)

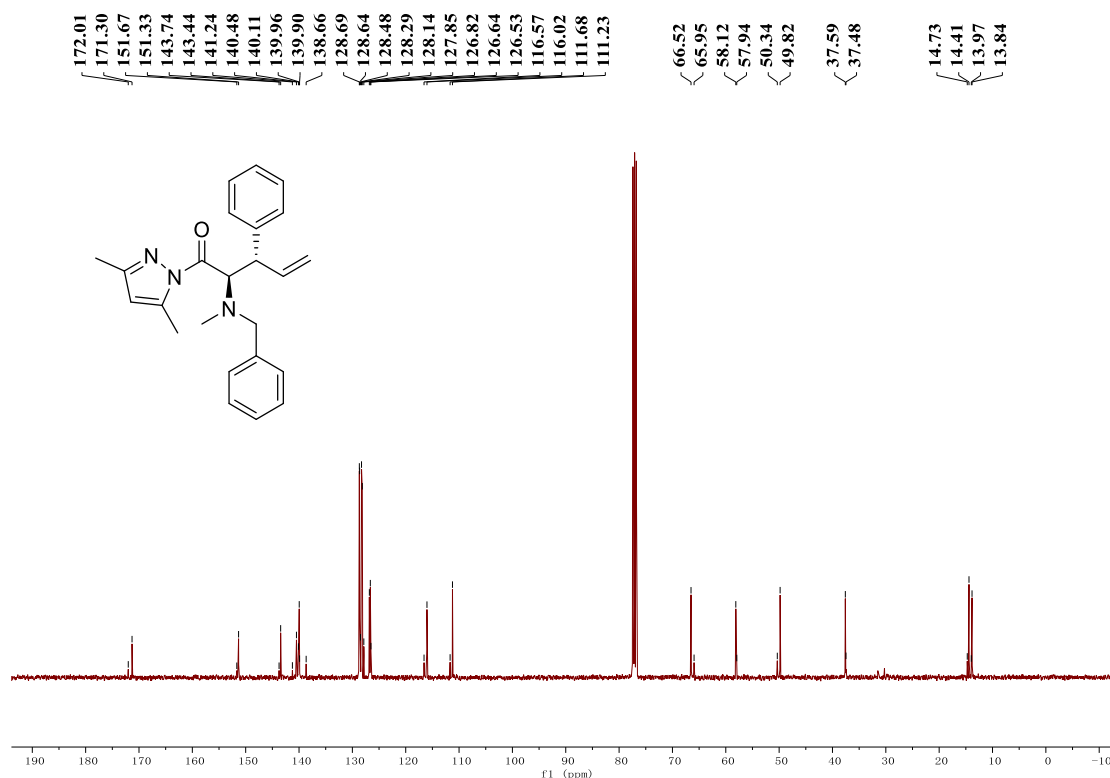

<sup>13</sup>C NMR of Compound **3ab** (101 MHz, CDCl<sub>3</sub>)

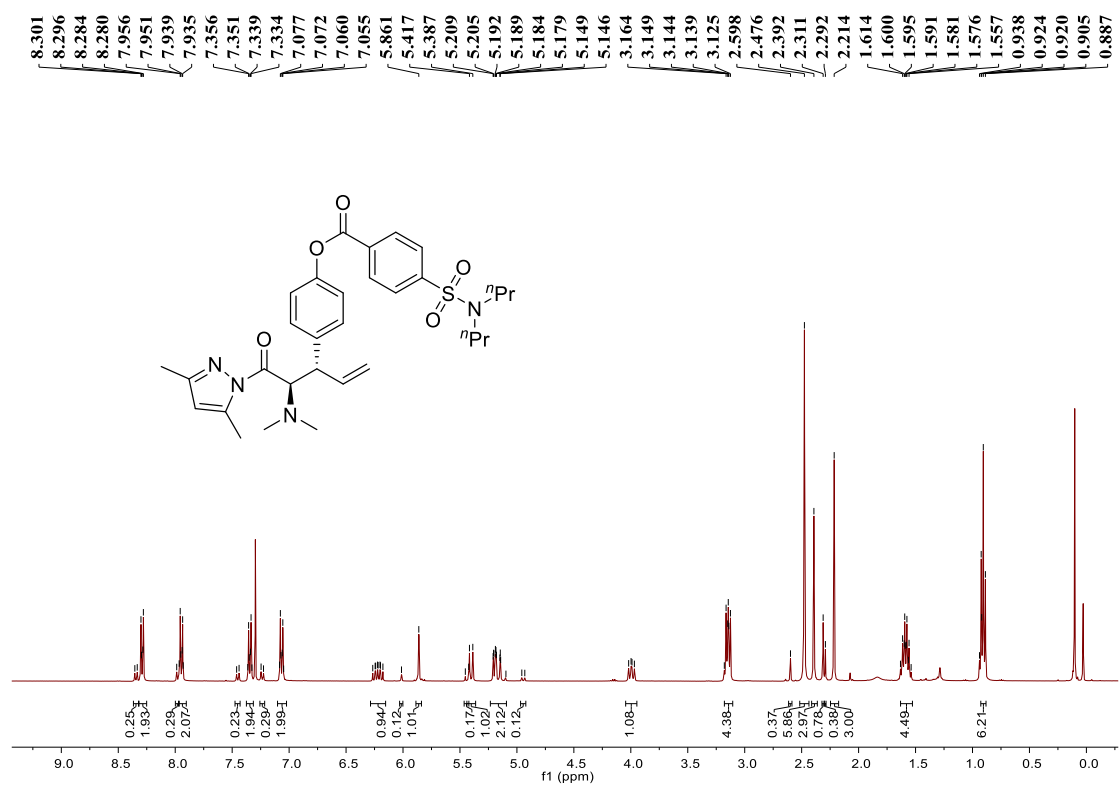

<sup>1</sup>H NMR of Compound 3a (400 MHz, CDCl<sub>3</sub>)

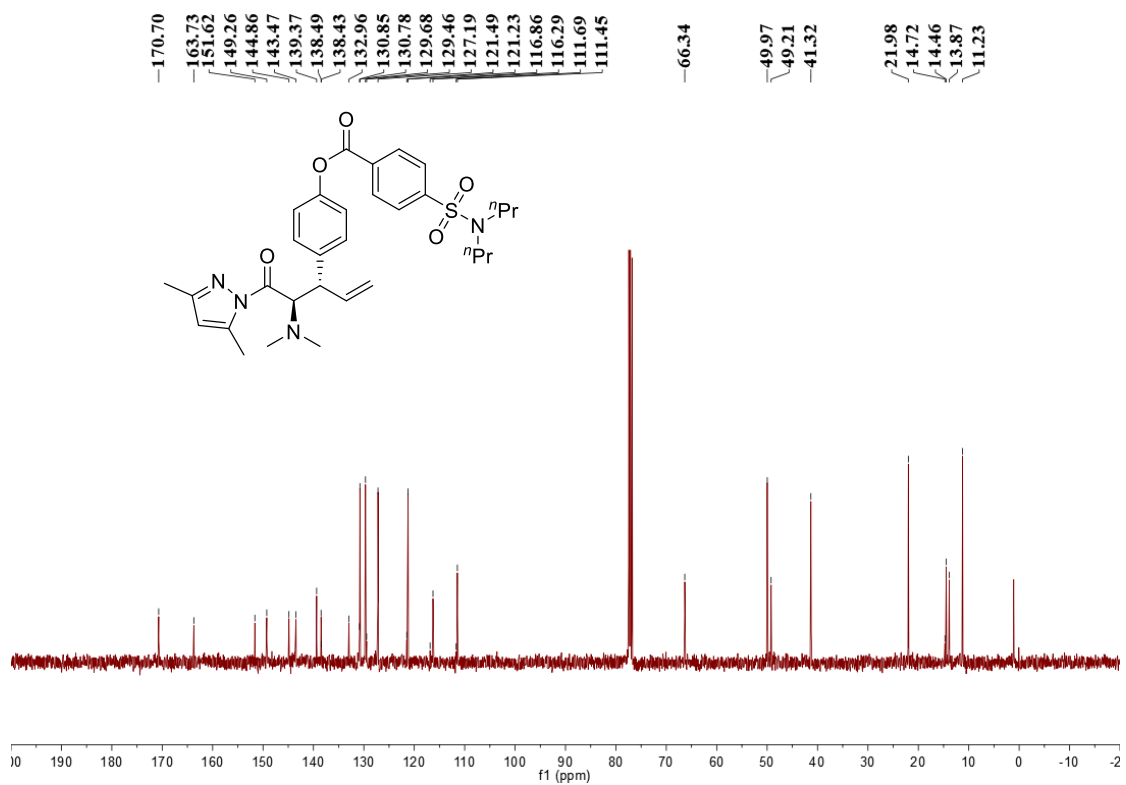

<sup>13</sup>C NMR of Compound 3a (101 MHz, CDCl<sub>3</sub>)

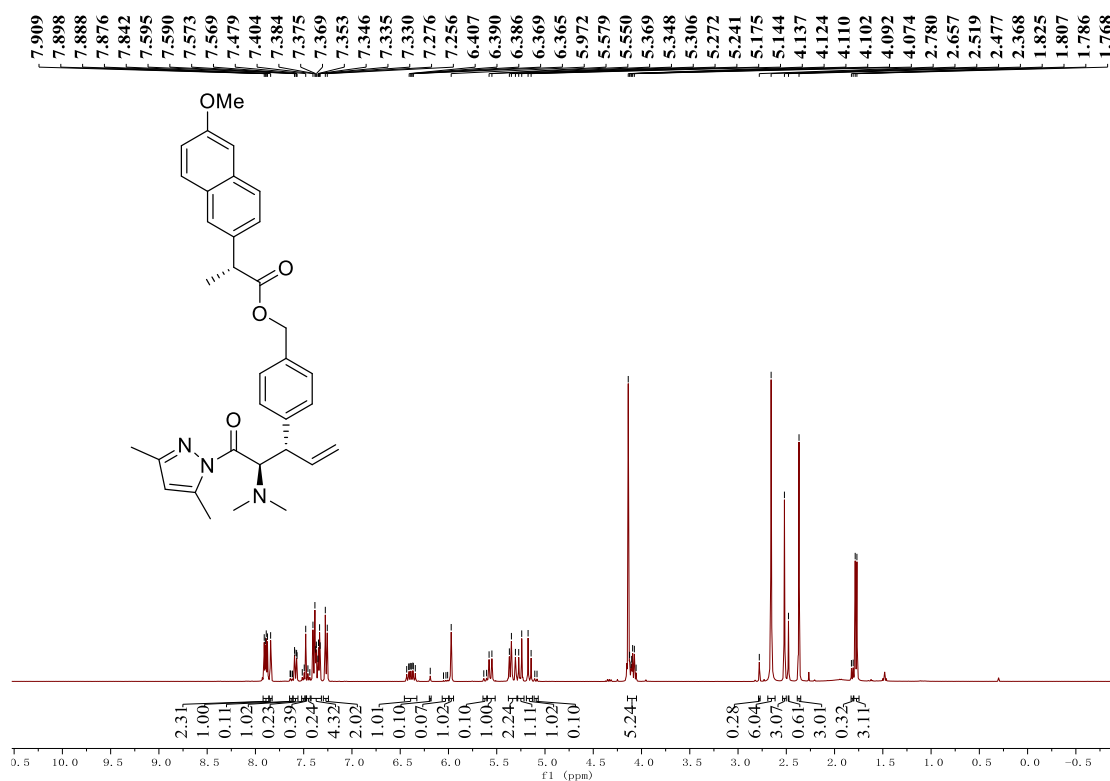

<sup>1</sup>H NMR of Compound 3b (400 MHz, CDCl<sub>3</sub>)

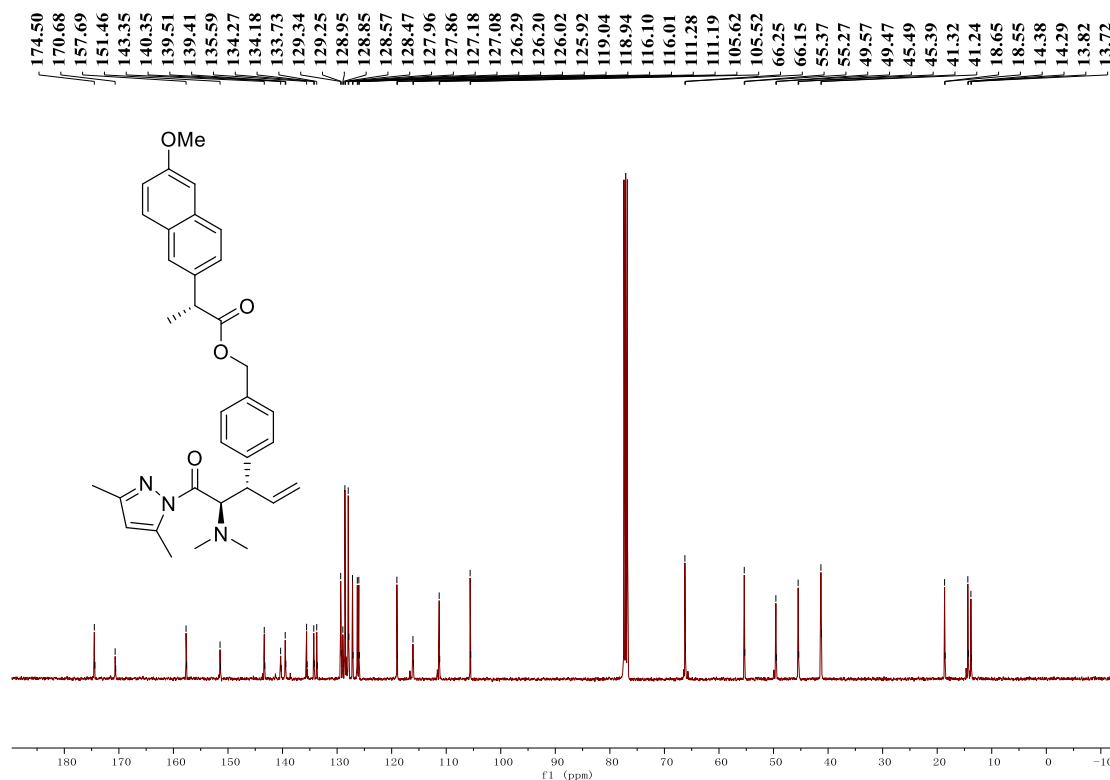

<sup>13</sup>C NMR of Compound 3b (101 MHz, CDCl<sub>3</sub>)

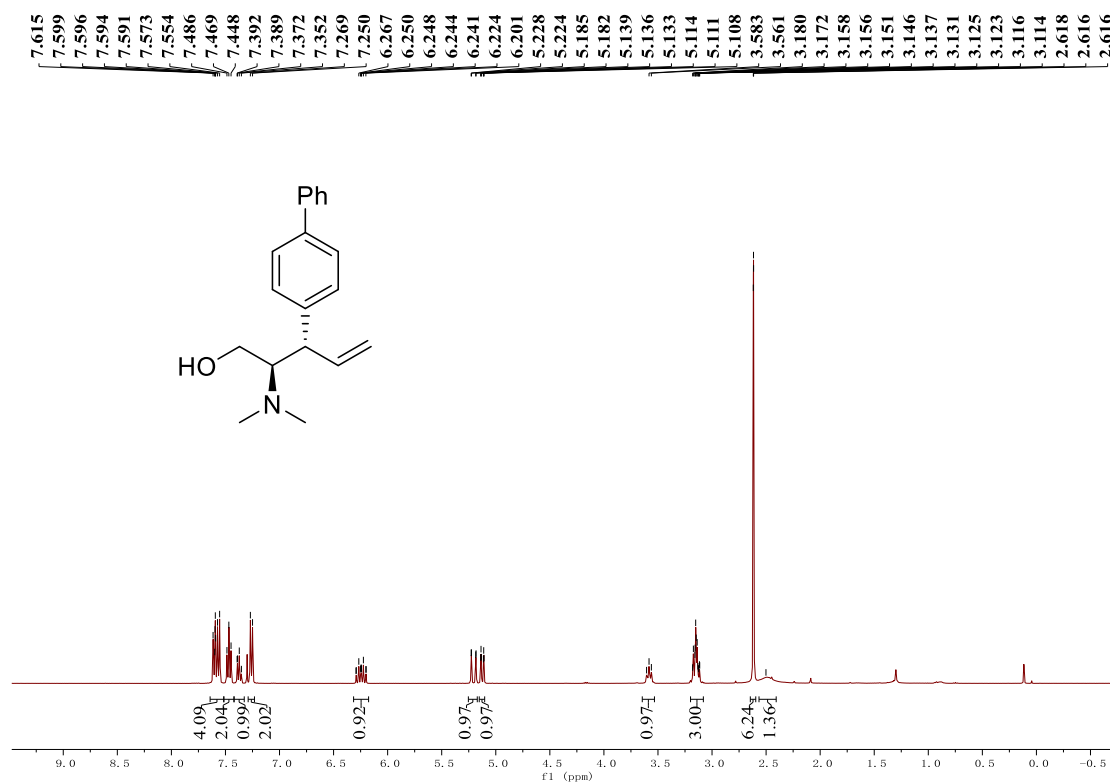

<sup>1</sup>H NMR of Compound 4 (400 MHz, CDCl<sub>3</sub>)

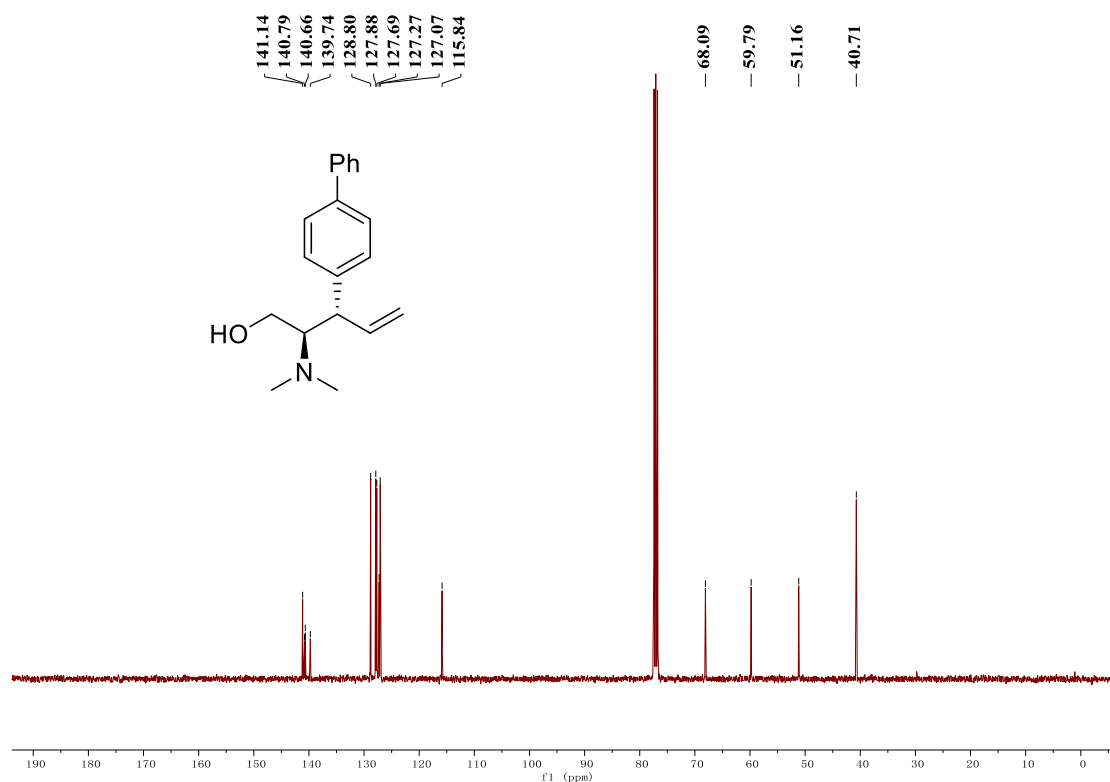

<sup>13</sup>C NMR of Compound 4 (101 MHz, CDCl<sub>3</sub>)



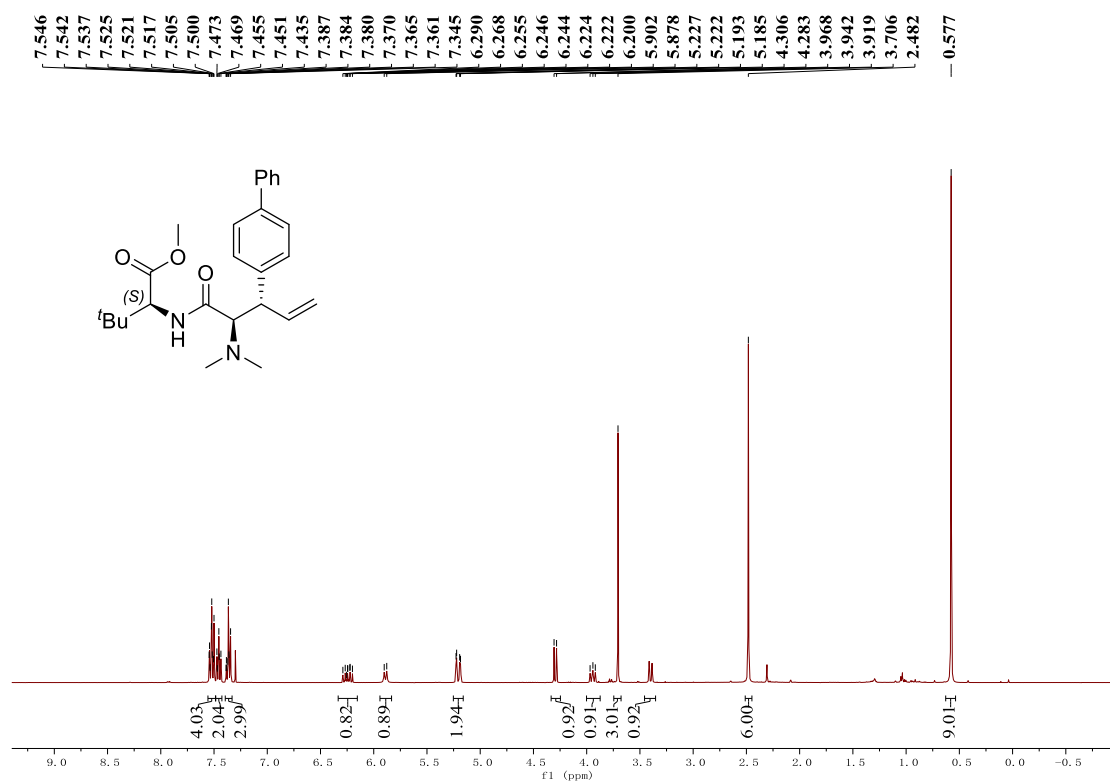

<sup>1</sup>H NMR of Compound **5** (400 MHz, CDCl<sub>3</sub>)

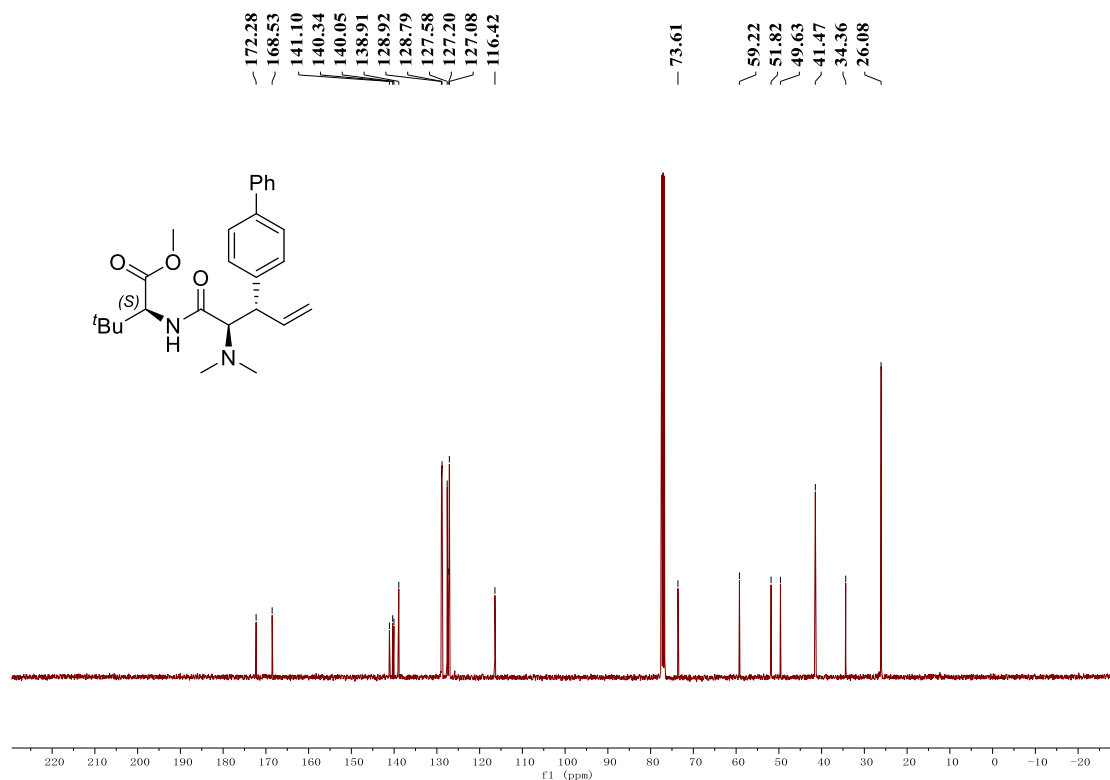

<sup>13</sup>C NMR of Compound **5** (101 MHz, CDCl<sub>3</sub>)

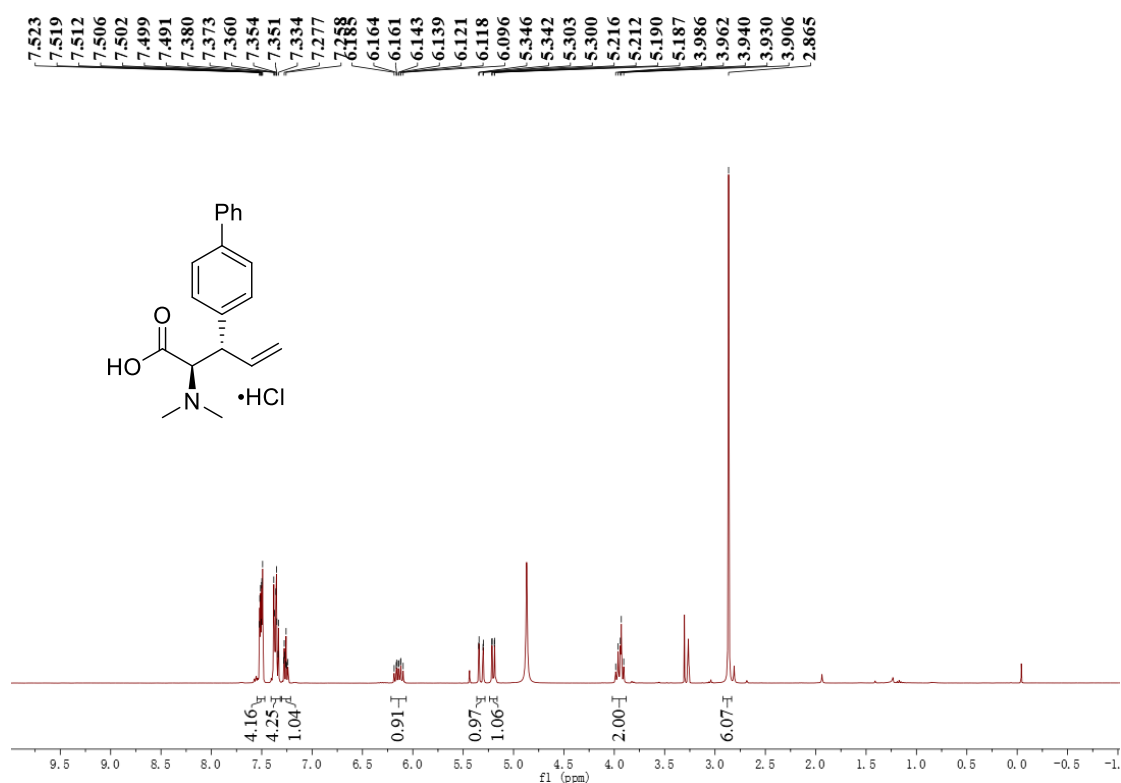

<sup>1</sup>H NMR of Compound 6 (400 MHz, MeOD)

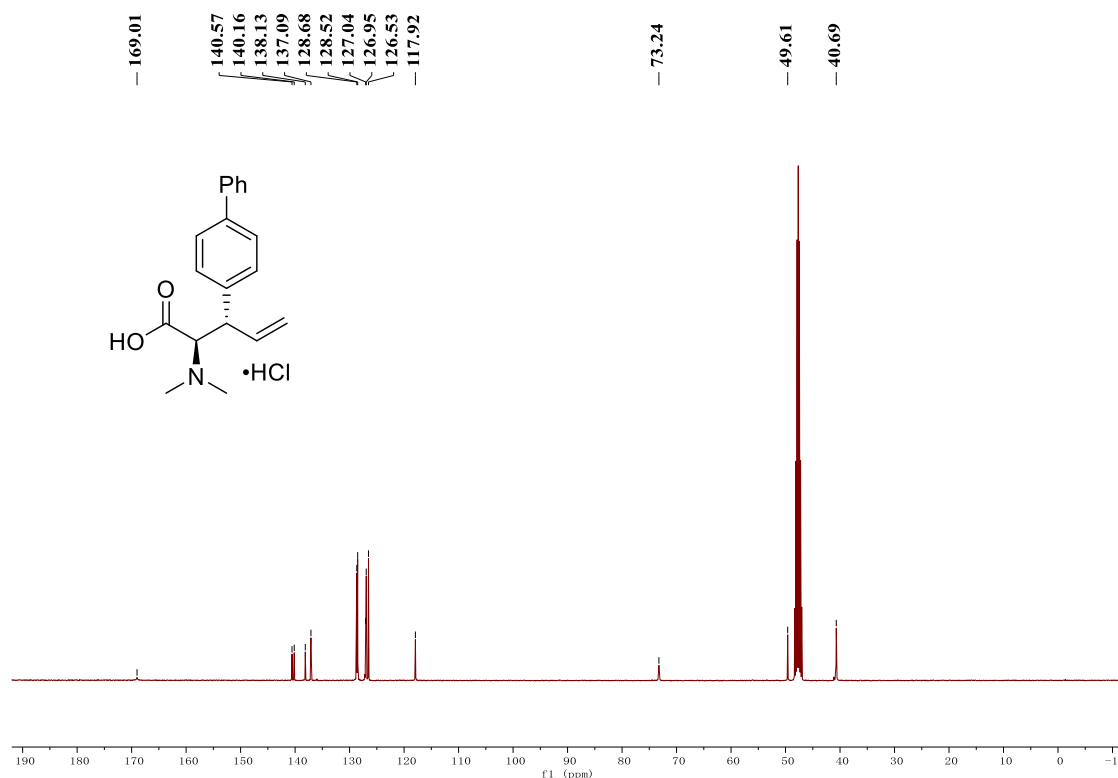

<sup>13</sup>C NMR of Compound 7 (101 MHz, MeOD)

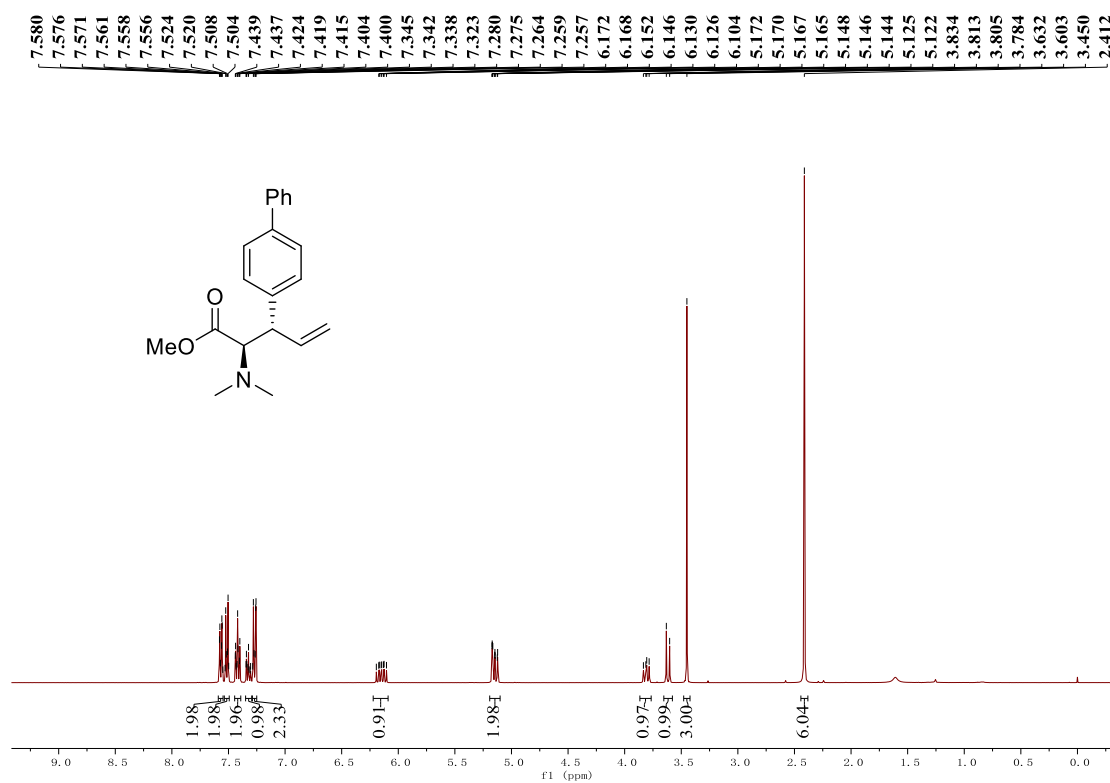

<sup>1</sup>H NMR of Compound **7** (400 MHz, CDCl<sub>3</sub>)

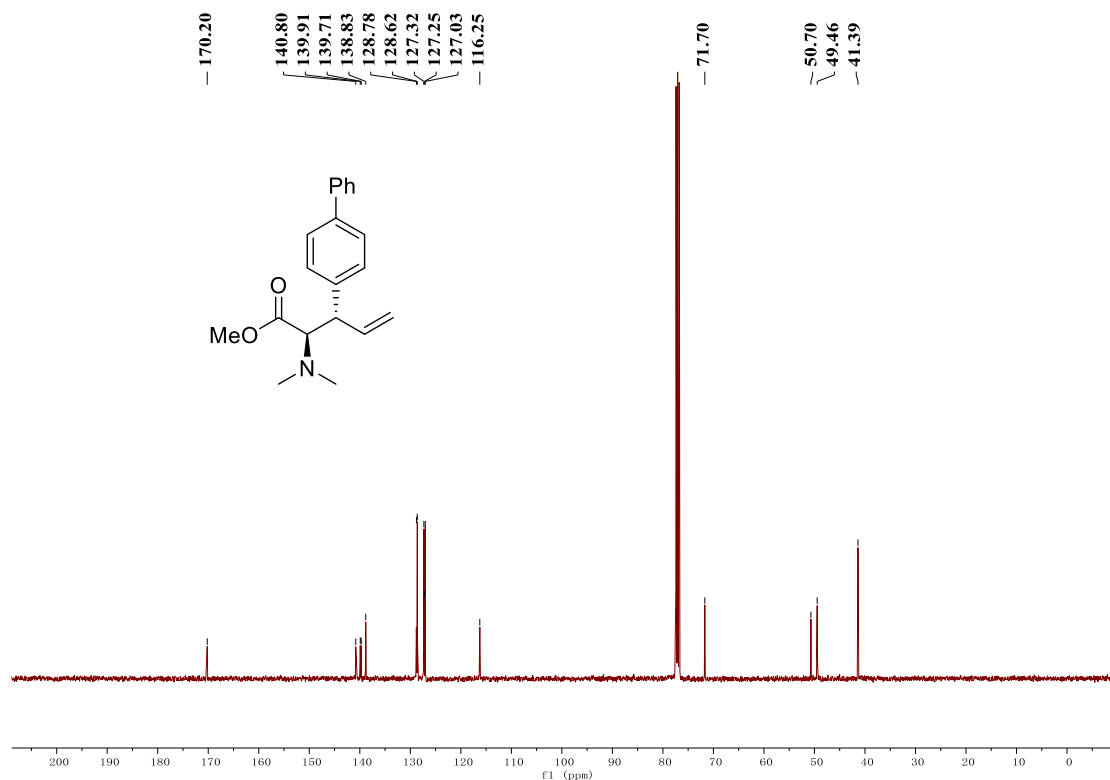

<sup>13</sup>C NMR of Compound **7** (101 MHz, CDCl<sub>3</sub>)

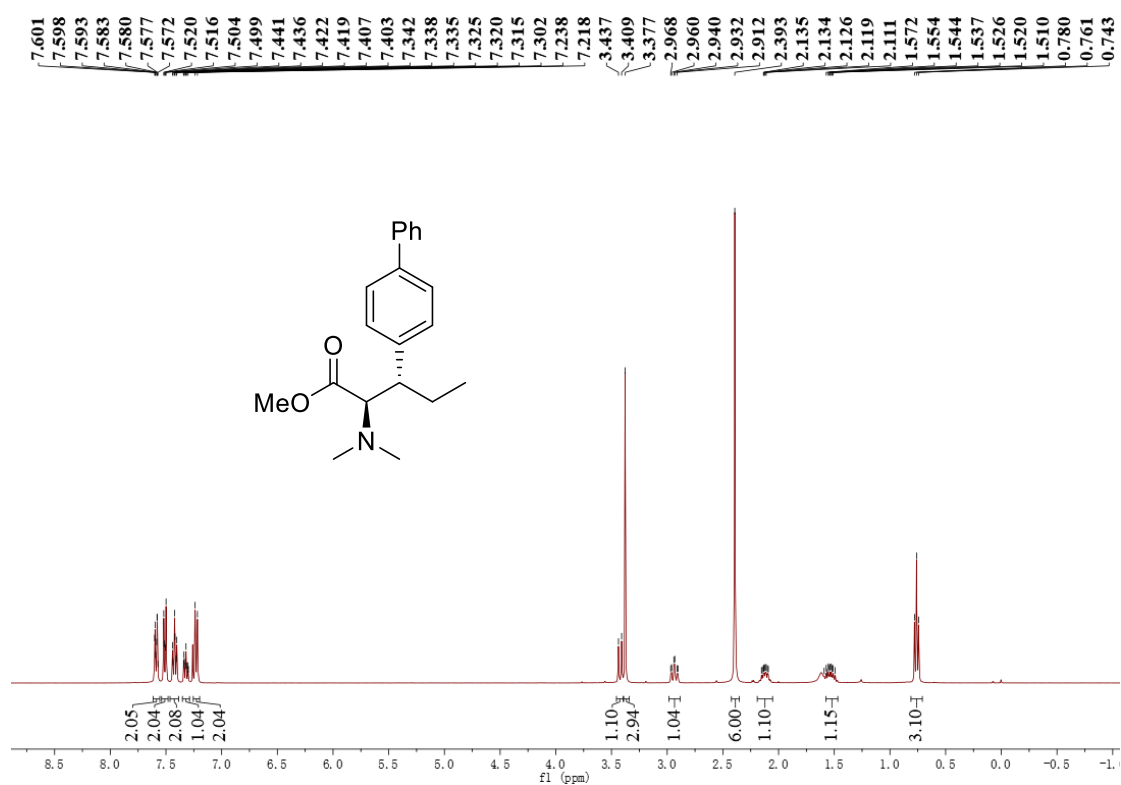

<sup>1</sup>H NMR of Compound 8 (400 MHz, CDCl<sub>3</sub>)

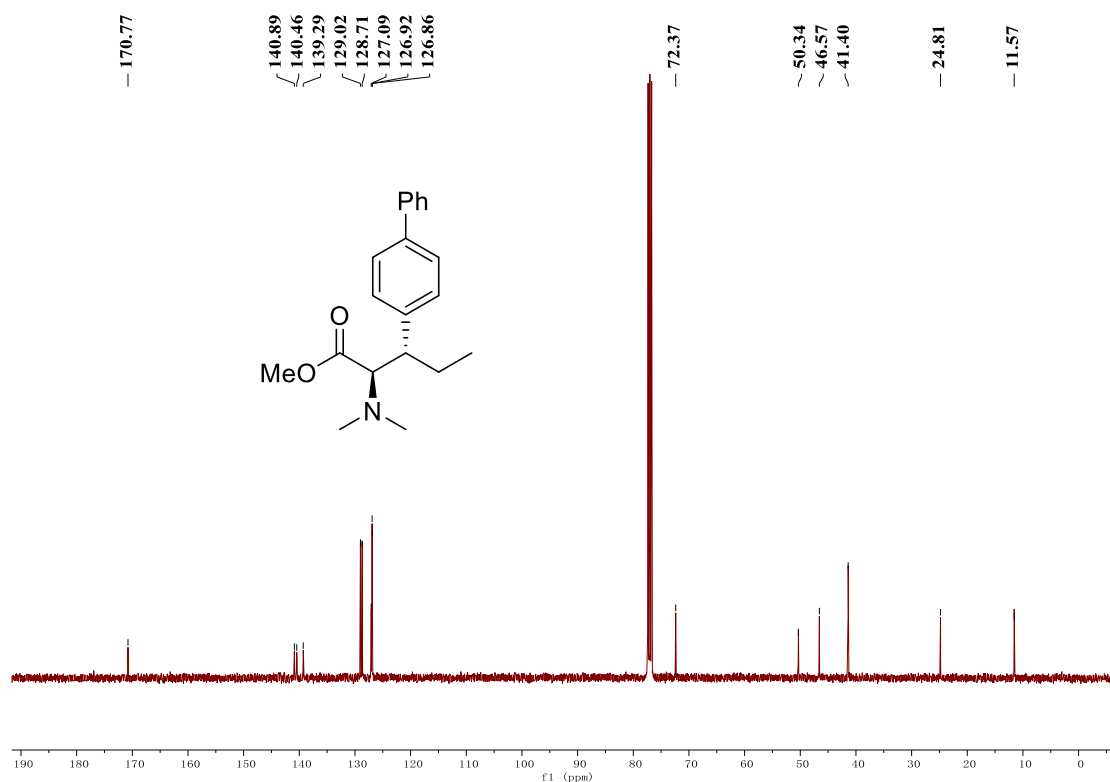

<sup>13</sup>C NMR of Compound 8 (101 MHz, CDCl<sub>3</sub>)

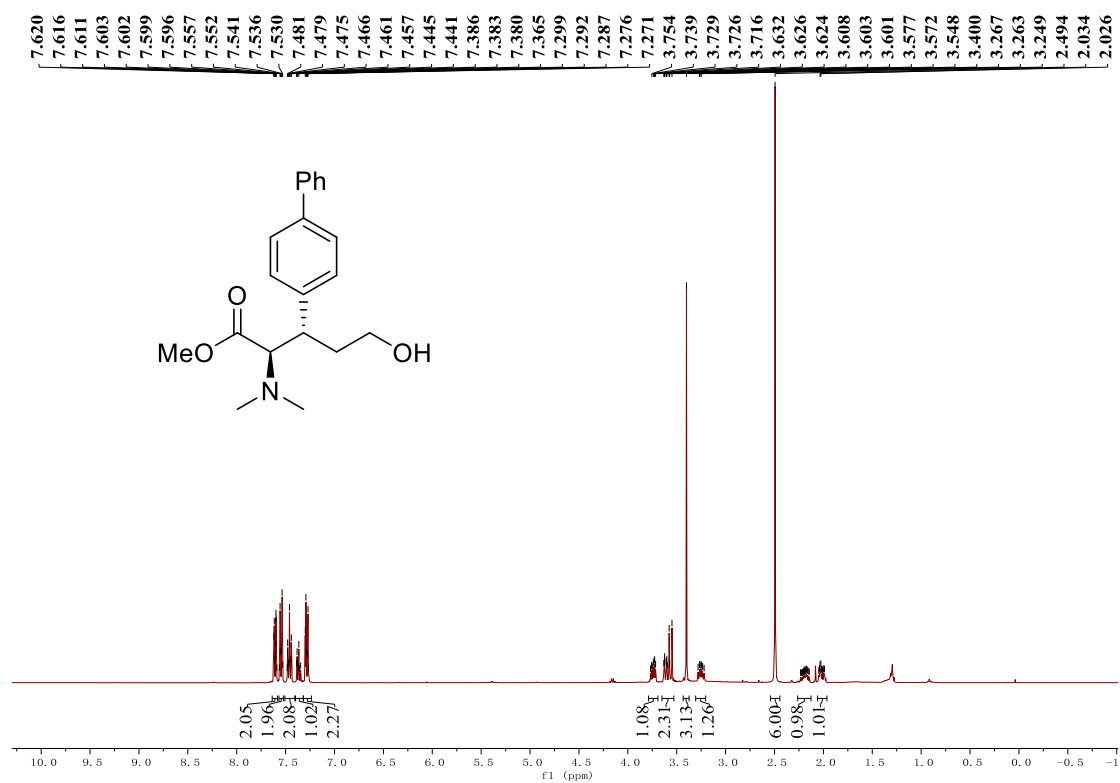

<sup>1</sup>H NMR of Compound 9 (400 MHz, CDCl<sub>3</sub>)

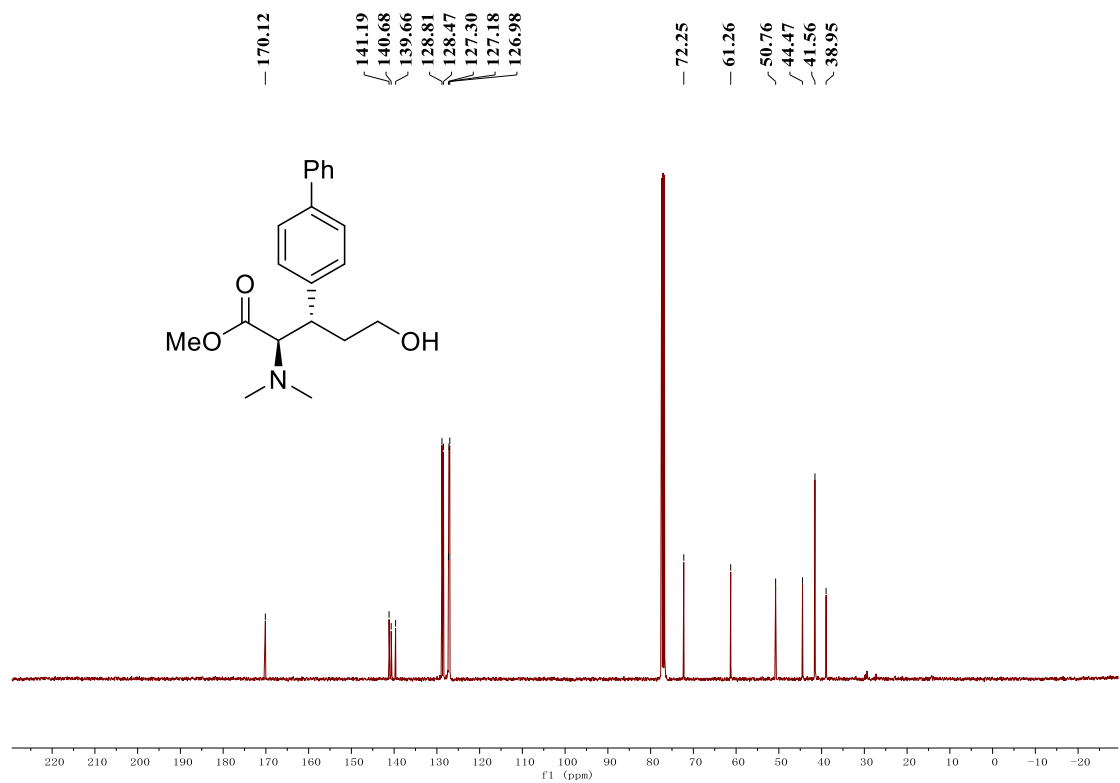

<sup>13</sup>C NMR of Compound 9 (101 MHz, CDCl<sub>3</sub>)

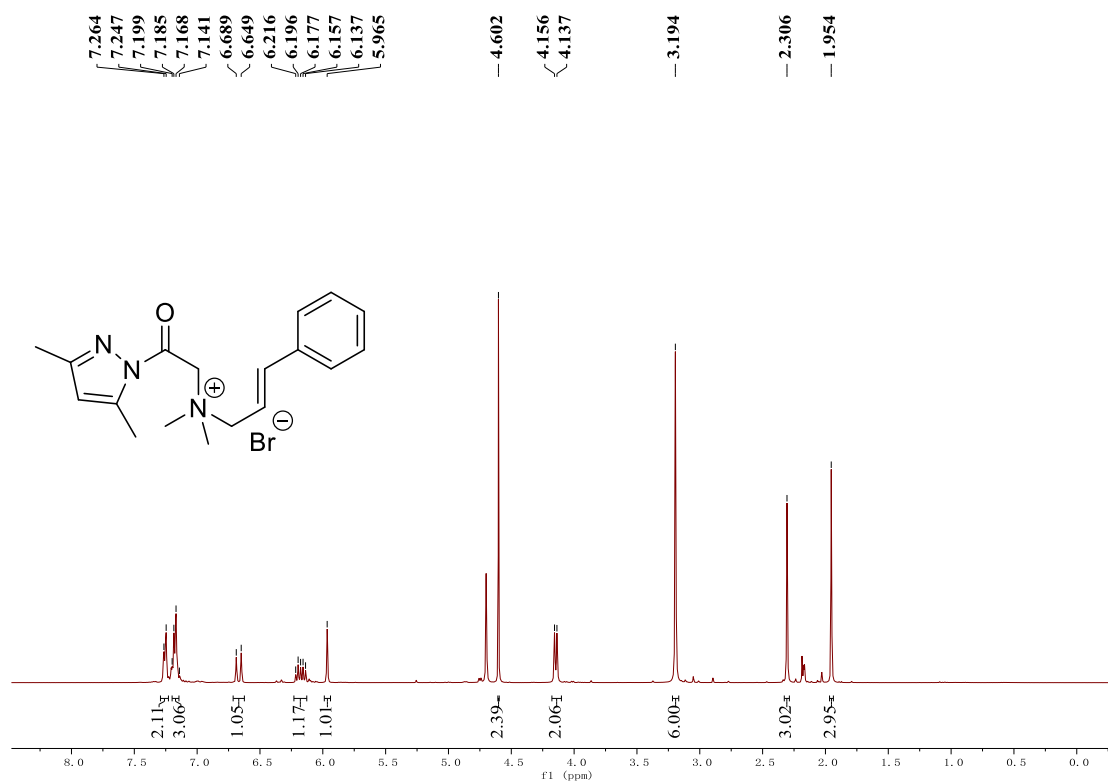

<sup>1</sup>H NMR of Compound **10** (400 MHz, D<sub>2</sub>O)

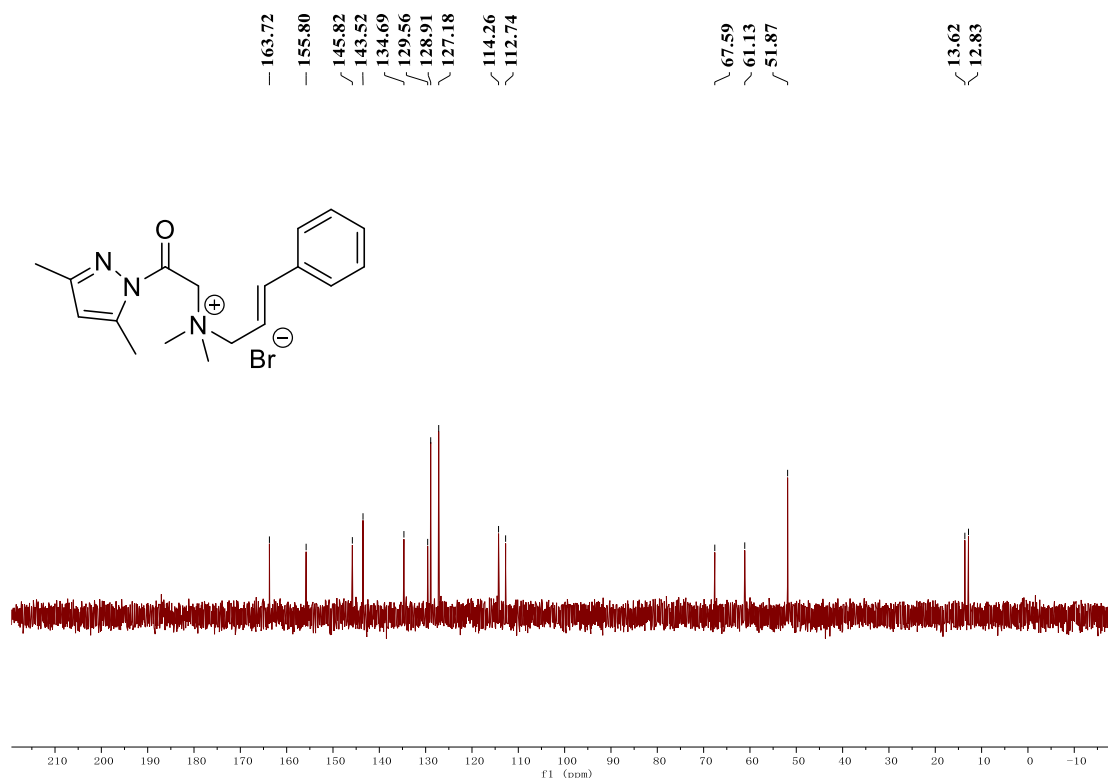

<sup>13</sup>C NMR of Compound **10** (101 MHz, D<sub>2</sub>O)
